# Supplementary material for: Comprehensive diagnostics of acute myeloid leukemia by whole transcriptome RNA sequencing
Source: PubMed Central journal article supplement (PMC7787979; doi:10.1038/s41375-020-0762-8), 2020-03-03
Supplement: 41375_2020_762_MOESM1_ESM.pdf [file 41375_2020_762_MOESM1_ESM.pdf]

## Supplemental Material Arindrarto *et al.*

### “Comprehensive diagnostics of acute myeloid leukemia by whole transcriptome RNA sequencing”

#### Table of contents

|                                      | Page |
|--------------------------------------|------|
| Figure S1                            | 2    |
| Figure S2                            | 3    |
| Figure S3                            | 4    |
| Figure S4                            | 5    |
| Figure S5                            | 6    |
| Figure S6                            | 7    |
| Figure S7                            | 8    |
| Table SI                             | 9    |
| Table SII                            | 12   |
| Table SIII                           | 14   |
| Table SIV                            | 15   |
| Table SV                             | 16   |
| Table SVI                            | 19   |
| Table SVII                           | 20   |
| Table SVIII                          | 29   |
| Table SIX                            | 31   |
| Table SX                             | 32   |
| Table SXI                            | 35   |
| Table SXII                           | 43   |
| Table SXIII                          | 46   |
| Table SXIV                           | 48   |
| Table SXV                            | 50   |
| Table SXVI                           | 51   |
| Table SXVII                          | 52   |
| Table SXVIII                         | 53   |
| Exemplary HAMLET report (case 1-003) | 54   |

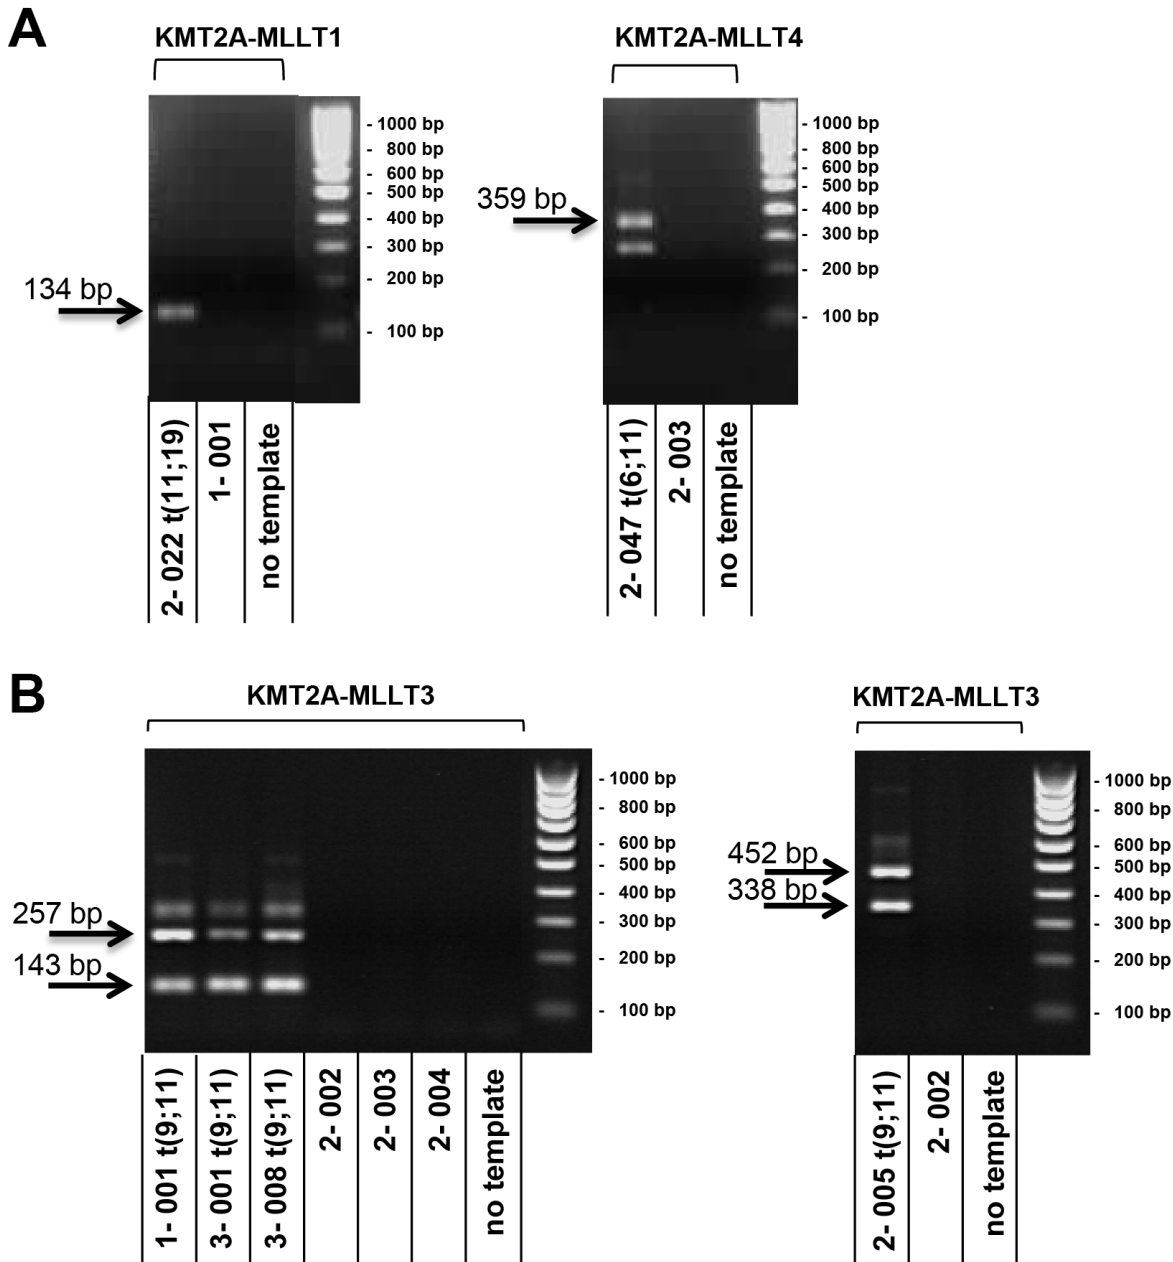

**Figure S1. Validation of *KMT2A* fusion transcripts by RT-PCR.**

Primers used for amplification are shown in Table SV. The breakpoints of all fusion transcripts were confirmed by sequencing (Table SIII).

A. Three fusion transcripts were detected by HAMLET in which *KMT2A* is fused to other partner genes than *MLLT3*, i.e. *KMT2A-MLLT1* in AML case 2-022, *KMT2A-MLLT4* in case 2-047 and *KMT2A-MLLT6* in case 3-010 (Fig 1B). All 3 fusion transcripts were validated by RT-PCR as a fragment of 134 bp (exon 9 of *KMT2A* fused to exon 2 of *MLLT1*) and a fragment of 359 bp (exon 8 of *KMT2A* fused to exon 2 of *MLLT4*). AML cases 1-001, 2-003, and a reaction without cDNA (no template) were included as negative controls.

B. *KMT2A-MLLT3* fusion transcripts containing exon 9 or 10 of *KMT2A* fused to exon 6 of *MLLT3* in AML cases 1-001, 3-001 and 3-008 were validated by RT-PCR as fragments of 257 and 143 bp (left). Two other *KMT2A-MLLT3* transcripts containing exon 9 or 10 of *KMT2A* fused to exon 5 of *MLLT3* were detected in case 2-005. These transcripts were validated by RT-PCR as fragments of 452 and 338 bp (right). AML cases 2-002, 2-003, 2-004, and a reaction without cDNA were included as negative controls.

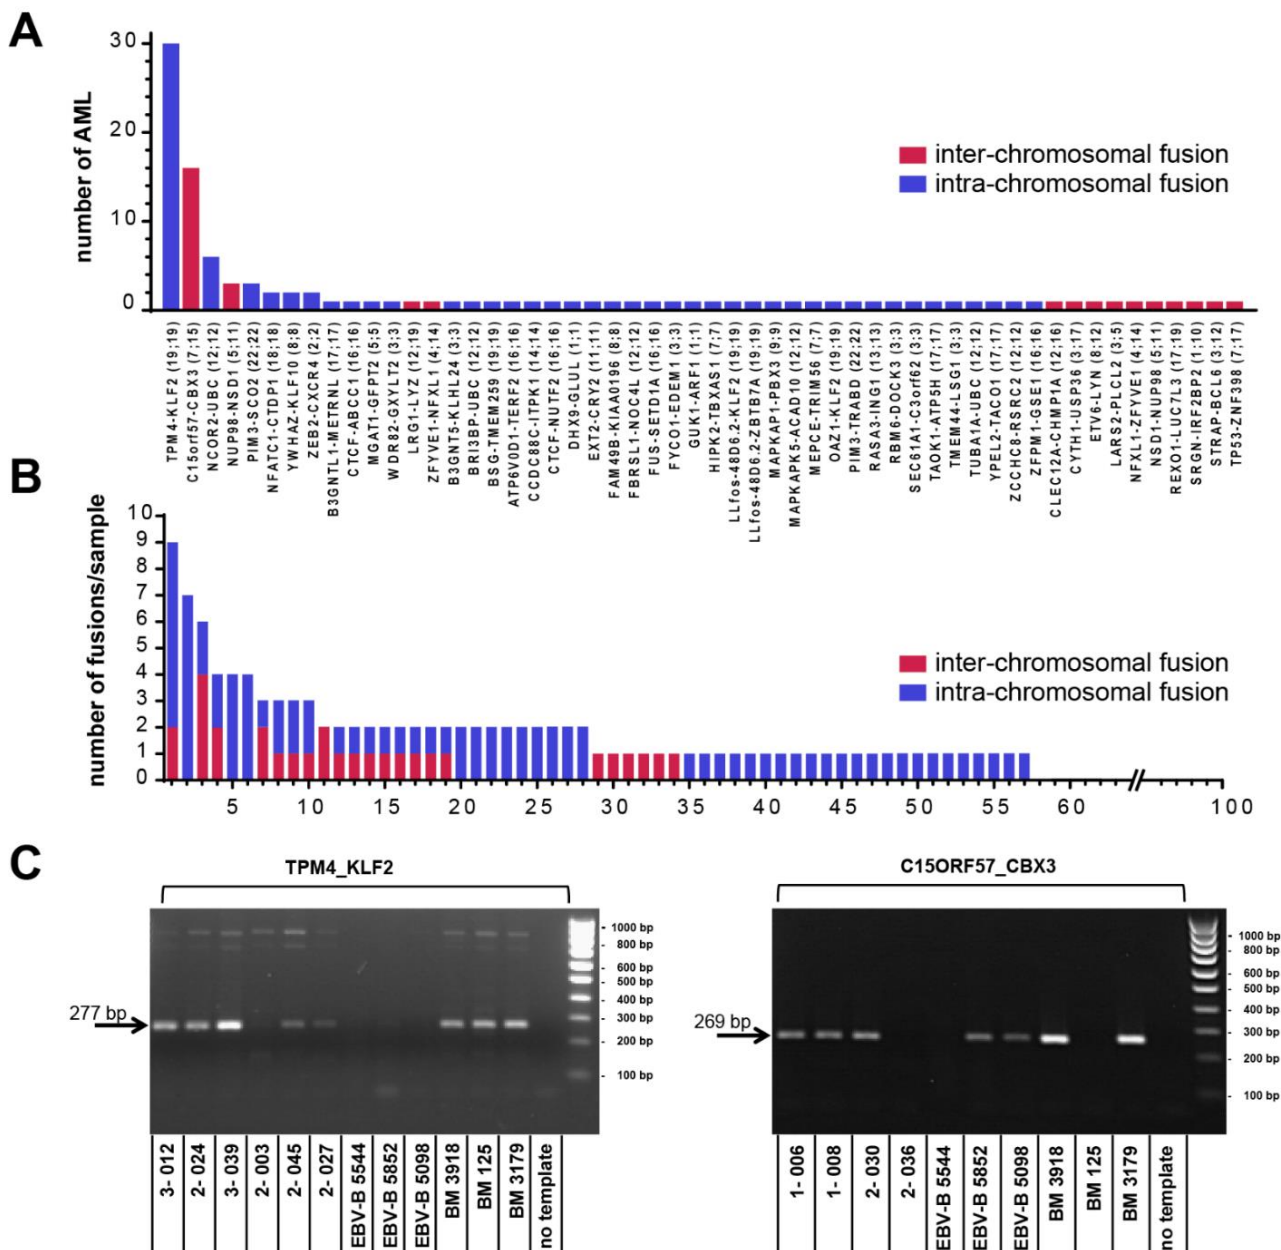

**Figure S2. Detection and validation of fusion transcripts without corresponding structural abnormalities by metaphase cytogenetics.**

A. Number of AML cases in which fusion transcripts were detected. Fusion transcripts between genes on the same chromosome (intra-chromosomal fusions) and fusion transcripts between genes on different chromosomes (inter-chromosomal fusions) are represented by blue and red bars, respectively. Fusion transcripts *TPM4-KLF2*, *C15ORF57-CBX3*, *NCOR2-UBC*, *NUP98-NSD1*, *NSD1-NUP98*, *PIM3-SCO2*, *ZEB2-CXCR4* and *ETV6-LYN* were validated by RT-PCR and the breakpoints of a number of these transcripts were confirmed by sequencing (Fig. 1B; Tables SIV & SV).

B. Number of different fusion transcripts without corresponding structural abnormalities by metaphase cytogenetics for each AML. AML are ranked by their number of different fusion transcripts.

C. Validation of the highly prevalent *TPM4-KLF2* and *C15ORF57-CBX3* fusion transcripts by RT-PCR with custom primers (Table SV). An amplicon of 277 bp demonstrated intrachromosomal fusion of *TPM4* exon 1 to *KLF2* exon 3 in all 3 positive AML (3-012, 2-024, 3-039) as well as in 2 control cases (2-045 and 2-027) and 3 healthy BM samples, but not in EBV-B cells and in a reaction without cDNA (no template). An amplicon of 269 bp demonstrates fusion of *C15ORF57* intron 2 to *CBX3* exon 1 in 2 positive AML (1-006, 1-008) as well as in one of the 2 control AML (2-030) and in 2 of the 3 EBV-B and healthy BM samples. *C15ORF57-CBX3* is a gene copy number polymorphism caused by retro-transposition with duplication of *CBX3* and insertion between the second and third exons of *C15orf57* (Schridder *et al.*, PLoS Genet 2013).

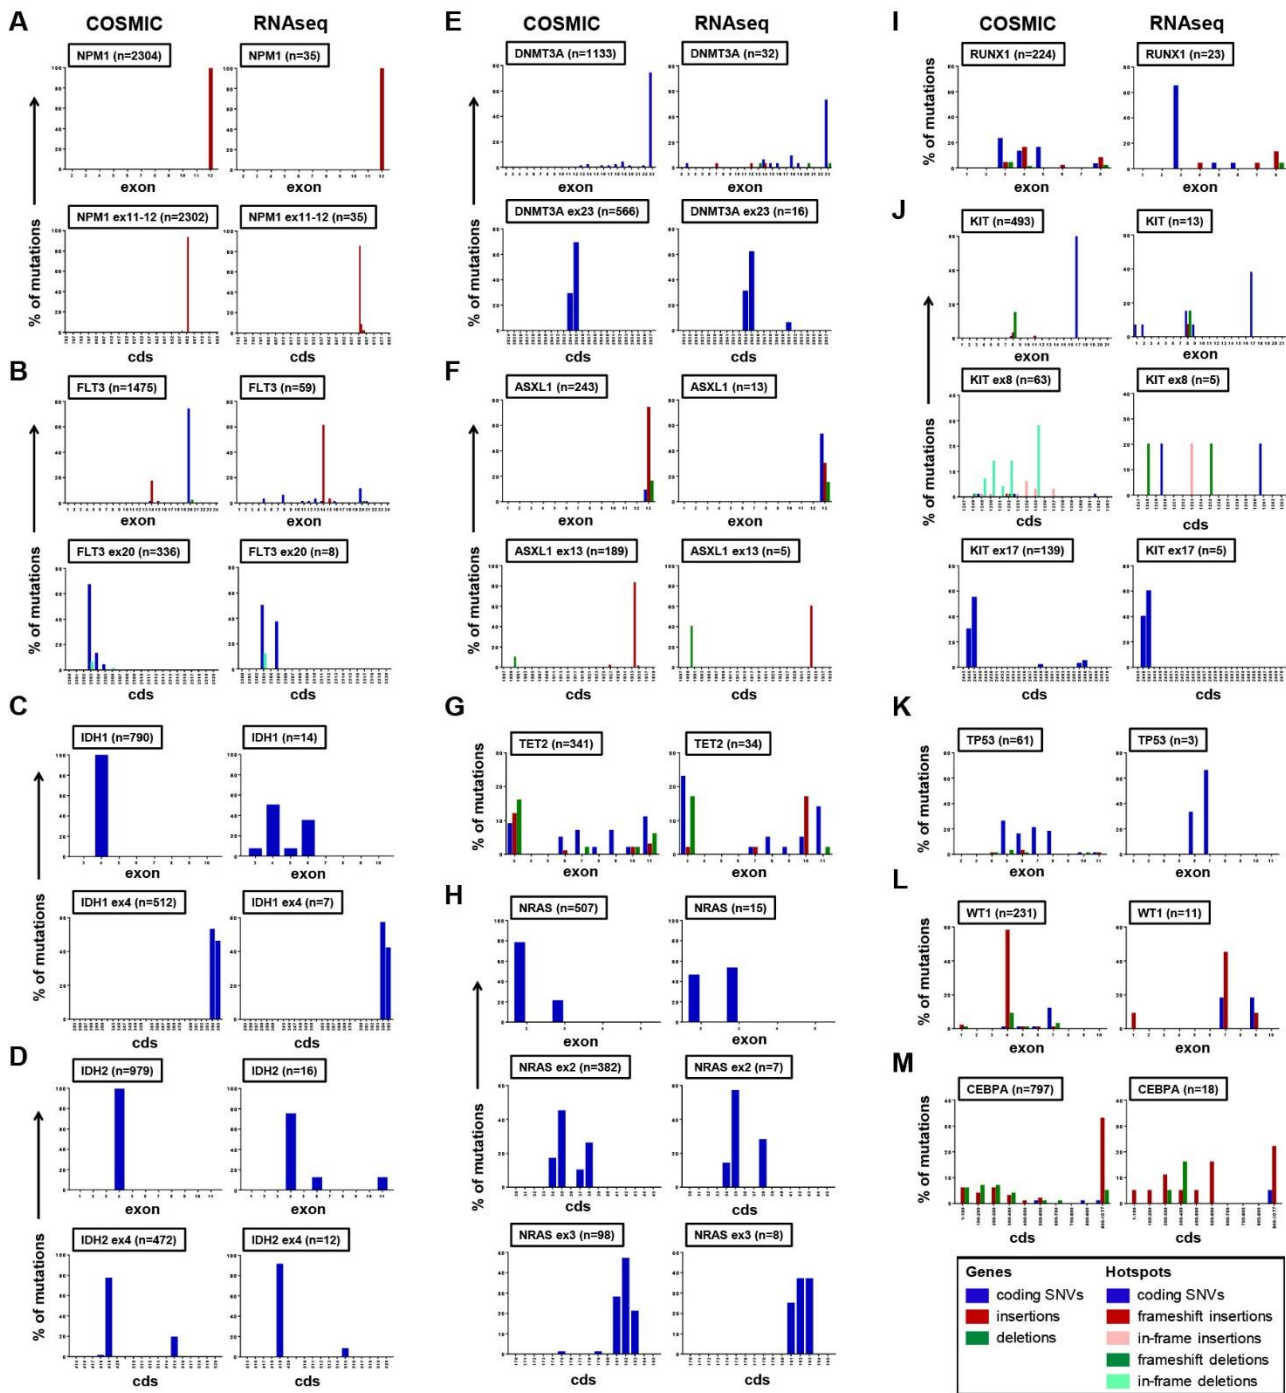

**Figure S3. Comparison of distribution of small variants in recurrently mutated AML genes between COSMIC and HAMLET.**

In the analysis of COSMIC data, all variants with protein consequences are included for which the exact location is known. For each gene (upper graphs), coding SNV, insertions and deletions in separate exons are represented by blue, red and green bars, respectively. For all hotspots (middle & lower graphs), the position of the variant in the coding sequence is indicated as well as whether indels are in-frame (light bar) or frameshift (dark bar) variants.

A. *NPM1*.

B. *FLT3*. In-frame variants in exon 14-15 are underrepresented in COSMIC due to lack of information on exon location for many *FLT3*-ITD.

C. *IDH1*, D. *IDH2*, E. *DNMT3A*.

F. *ASXL1*.

G. *TET2*, H. *NRAS*, I. *RUNX1*, J. *KIT*, K. *TP53*, L. *WT1*, M. *CEBPA*.

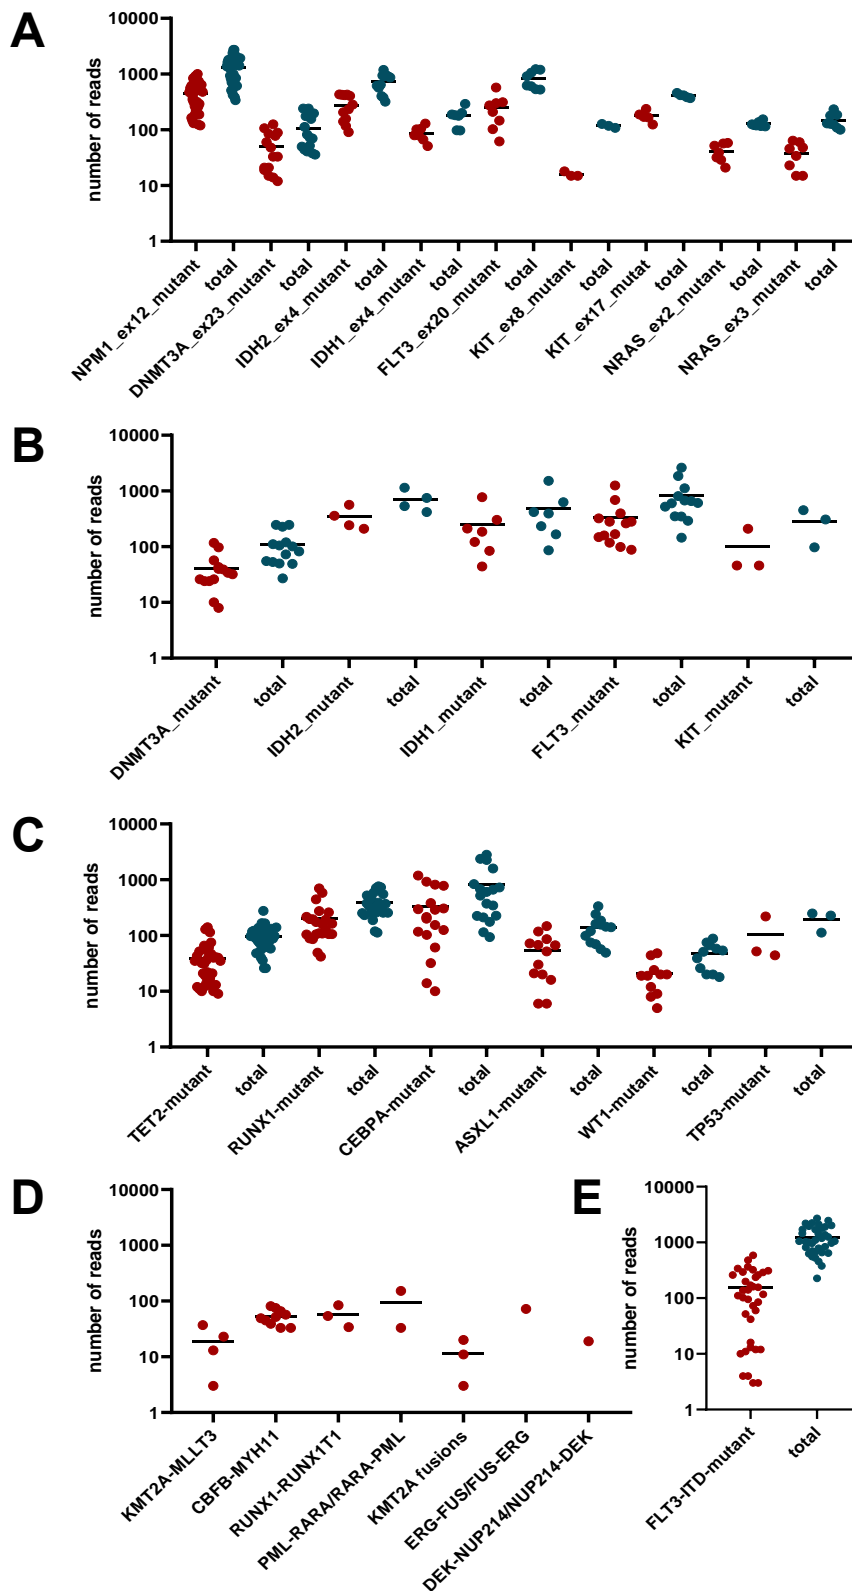

**Figure S4. Number of reads for genetic aberrations in AML.**

- A. Mutant and total reads at the same position in hotspot regions in *NPM1* (exon 12), *DNMT3A* (exon 23), *IDH2* (exon 4), *IDH1* (exon 4), *FLT3*-TKD (exon 20), *KIT* (exon 8 & 17), *NRAS* (exon 2 & 3).
- B. Mutant and total reads at the same position outside hotspots in *DNMT3A*, *IDH2*, *IDH1*, *FLT3*, *KIT*.
- C. Mutant and total reads at the same position in *TET2*, *RUNX1*, *CEBPA*, *ASXL1*, *WT1* and *TP53*.
- D. Number of junction reads and spanning fragments for fusion genes.

Soft clipped reads for *FLT3*-ITD and corresponding total reads in exon 14 & 15.



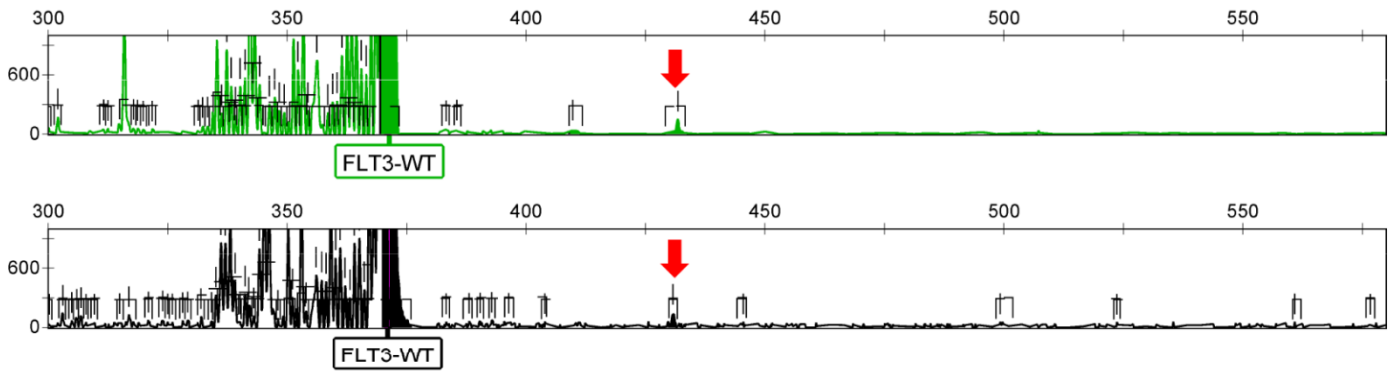

**Figure S6. Retrospective analysis of diagnostic *FLT3*-ITD results.**

Retrospective analysis of diagnostic results for case 2-028 (positive by RNAseq but negative by routine diagnostics) showed a weak signal of a mutant allele indicated by red arrows below the standard cut-off for *FLT3*-ITD > 200. PCR was performed on genomic DNA using NED-5'-GTAAAACGACGCCCGAGTCTGAAGCAATTTAGGTATGAAAGC-3' and VIC-5'-GGAAACAGCTATGACCATGTACCTTTCAGCATTTTGACG-3' as forward and reverse primers, respectively. PCR fragments were detected after capillary electrophoresis by measuring green (VIC; upper) and yellow (NED; lower) dyes.

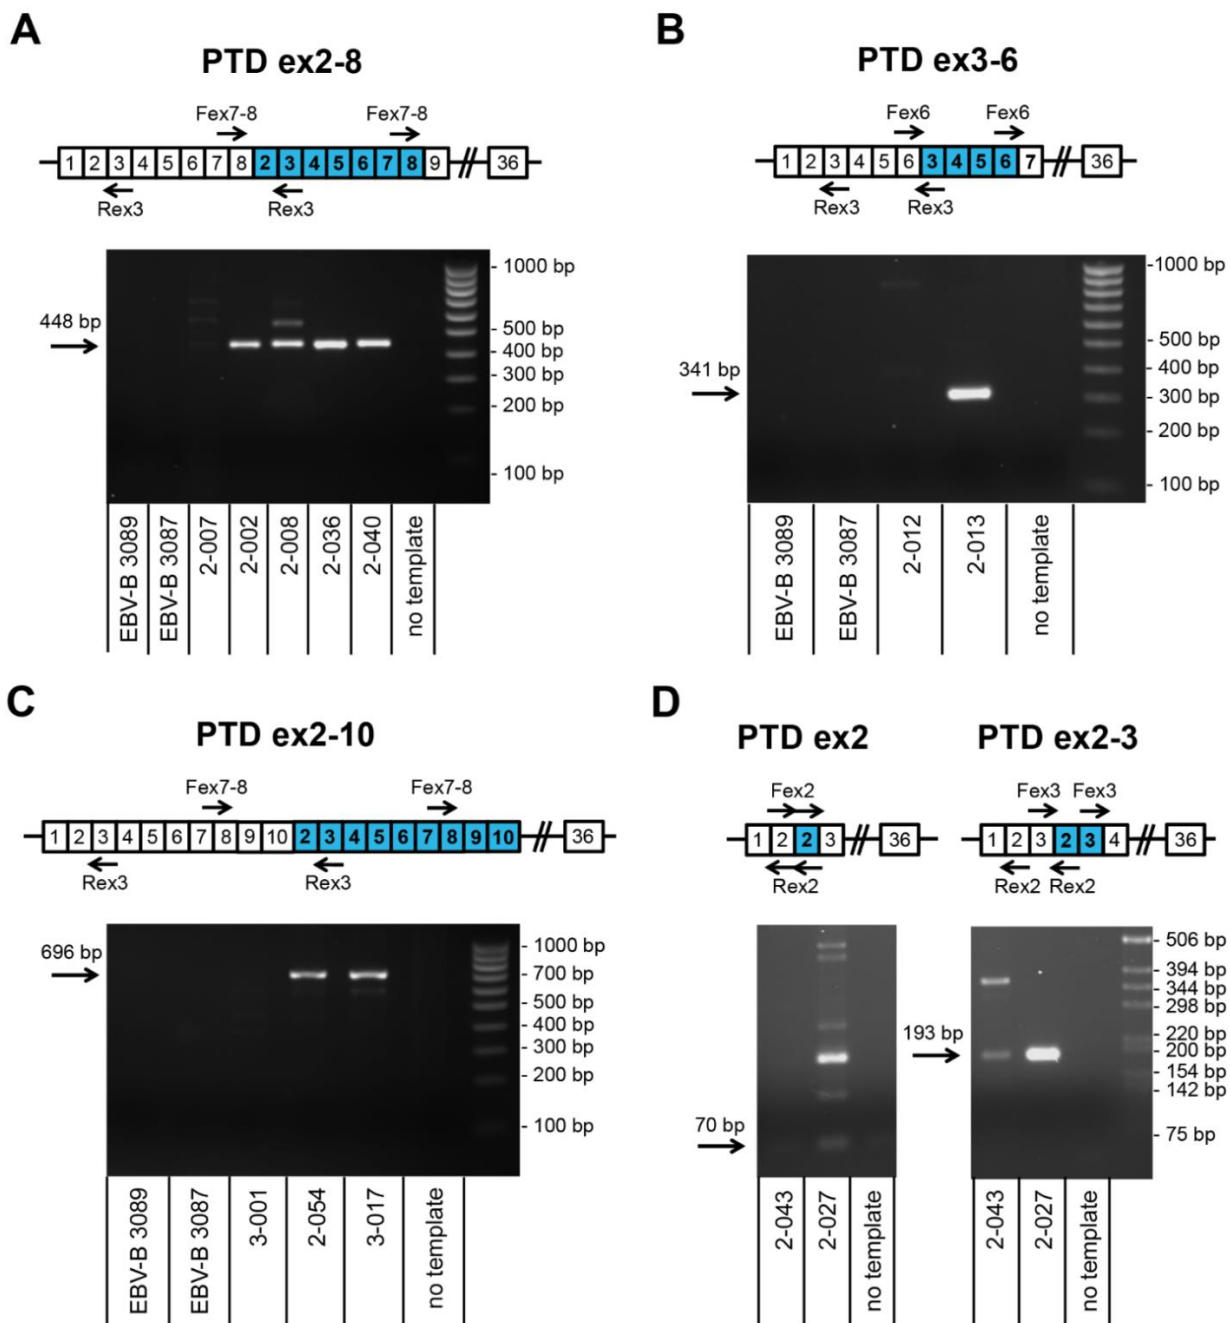

**Figure S7. Validation of *KMT2A*-PTD as detected by HAMLET by RT-PCR.**

Two EBV-B samples, negative AML cases (2-007, 2-012, 3-001, 2-043) and a reaction without cDNA (no template) were included as negative controls.

A. Exon 2-8 PTD in cases 2-002, 2-008, 2-036, and 2-040 detected as 448 bp amplicons using a forward primer in exon 7-8 and reverse primer in exon 3.

B. Exon 3-6 PTD in case 2-013 detected as 341 bp amplicon using a forward primer in exon 6 and a reverse primer in exon 3.

C. Exon 2-10 PTD in cases 2-054 and 3-017 detected as 696 bp amplicon using a forward primer in exon 7-8 and a reverse primer in exon 3.

D. Exon 2 PTD in case 2-027 detected as 70 bp amplicon using a forward and reverse primer in exon 2 with the reverse primer located upstream of the forward primer (left). The reverse primer in exon 2 also binds to exon 3 sequences, which in combination with the forward primer in exon 2 results in various PCR fragments larger than 70 bp. Exon 2-3 PTD in case 2-027 detected 193 bp amplicon using a forward primer in exon 3 and reverse primer in exon 2 (right). The reverse primer in exon 2 also binds to exon 3 sequences, which in combination with the forward primer in exon 3 results in various PCR fragments representing wildtype *KMT2A* in case 2-043.



**Table SI. AML samples analysed by RNAseq.**

| Sample <sup>1</sup> | Patient | Gender | Age | WHO diagnosis <sup>6</sup>                                  | Primary/Relapse | Source <sup>7</sup> | Blast (%) | Karyotype <sup>8</sup>                                                                                                                                                                                          | FLT3-ITD <sup>9</sup> | Mut. NPM1 <sup>9</sup> |
|---------------------|---------|--------|-----|-------------------------------------------------------------|-----------------|---------------------|-----------|-----------------------------------------------------------------------------------------------------------------------------------------------------------------------------------------------------------------|-----------------------|------------------------|
| 1-001               | 8412    | M      | 34  | AML with t(9;11); <i>KMT2A-MLLT3</i>                        | Primary         | BM                  | 96        | 46, XX, t(9;11)(p21;q23)                                                                                                                                                                                        | neg                   | neg                    |
| 1-002               | 9559    | F      | 41  | AML with mutated NPM1                                       | Primary         | BM                  | 87        | 46, XX                                                                                                                                                                                                          | pos                   | pos                    |
| 1-003               | 10197   | F      | 65  | AML with mutated NPM1                                       | Primary         | BM                  | 98        | 46, XX                                                                                                                                                                                                          | pos                   | pos                    |
| 1-004               | 9848    | M      | 77  | AML with inv(16); <i>CBFB-MYH11</i>                         | Primary         | BM                  | 70        | 46, XY, inv(16)(p13q22)                                                                                                                                                                                         | neg                   | neg                    |
| 1-005               | 4781    | M      | 49  | AML with inv(3); <i>GATA2, MECOM</i>                        | Primary         | PB                  | 22        | 46, XY, inv(3)(q21q26), del(7)(q21), -17, der(19)t(17;19)(q22;q13) / 46-48, XY, del(2)(p21)[8], -3[9], del(3)(q23)[8], +6[6], -7[8], del(11)(p13)[9], add(12)(p11)[9], inv(15)(q?13q?23)[6], +ring[8], +mar1[8] | neg                   | neg                    |
| 1-006               | 8522    | F      | 71  | Acute monoblastic/monocytic leukemia                        | Primary         | BM                  | 55        | 46, X, add(X)(q2?), add(1)(q4?), add(3)(p21), add(20)(q11.2)                                                                                                                                                    | neg                   | neg                    |
| 1-007               | 9009    | M      | 45  | AML with t(8;21); <i>RUNX1-RUNX1T1</i>                      | Primary         | BM                  | 67        | 46, XY, t(8;21)(q22;q22)                                                                                                                                                                                        | neg                   | neg                    |
| 1-008               | 10143   | M      | 61  | AML with myelodysplasia-related changes                     | Primary         | BM                  | 15        | 46, XY, t(3;8)(q26;q24)                                                                                                                                                                                         | neg                   | neg                    |
| 2-001               | 587     | F      | 46  | Acute monoblastic/monocytic leukemia                        | Primary         | PB                  | 90        | 46, XX                                                                                                                                                                                                          | pos                   | pos                    |
| 2-002               | 1143    | M      | 65  | Acute monoblastic/monocytic leukemia                        | Primary         | BM                  | 90        | 46, XY                                                                                                                                                                                                          | neg                   | neg                    |
| 2-003               | 1127    | M      | 46  | Acute monoblastic/monocytic leukemia                        | Primary         | PB                  | 95        | 46, XY                                                                                                                                                                                                          | neg                   | neg                    |
| 2-004               | 1310    | M      | 49  | AML with inv(16); <i>CBFB-MYH11</i>                         | Primary         | BM                  | 85        | 46, XY, inv(16)(p13q22)                                                                                                                                                                                         | neg                   | neg                    |
| 2-005               | 1466    | M      | 37  | AML with t(9;11); <i>KMT2A-MLLT3</i>                        | Primary         | BM                  | 28        | 46, XY, t(9;11)(p21;q23)                                                                                                                                                                                        | neg                   | neg                    |
| 2-006               | 1591    | M      | 22  | Acute promyelocytic leukemia with t(15;17); <i>PML-RARA</i> | Primary         | PB                  | 95        | 46, XY, t(15;17)(q24;q21)                                                                                                                                                                                       | pos                   | neg                    |
| 2-007               | 1775    | M      | 49  | AML with inv(16); <i>CBFB-MYH11</i>                         | Primary         | PB                  | 89        | 46, XY, inv(16)(p13q22)                                                                                                                                                                                         | neg                   | neg                    |
| 2-008               | 2055    | M      | 77  | Acute monoblastic/monocytic leukemia                        | Primary         | PB                  | 64        | 47, XY, +11                                                                                                                                                                                                     | neg                   | neg                    |
| 2-009               | 2250    | M      | 38  | AML NOS with maturation                                     | Primary         | BM                  | 95        | 46, XY                                                                                                                                                                                                          | neg                   | neg                    |
| 2-010               | 2467    | M      | 48  | AML with inv(16); <i>CBFB-MYH11</i>                         | Primary         | BM                  | 60        | 49, XY, +8, +14, inv(16)(p13q22), +21                                                                                                                                                                           | neg                   | neg                    |
| 2-011               | 2536    | F      | 44  | AML NOS without maturation                                  | Primary         | BM                  | 95        | 46, XX                                                                                                                                                                                                          | neg                   | pos                    |
| 2-012               | 2899    | F      | 44  | Acute monoblastic/monocytic leukemia                        | Primary         | PB                  | 80        | 46, XX                                                                                                                                                                                                          | pos                   | pos                    |
| 2-013               | 3009    | M      | 71  | Acute monoblastic/monocytic leukemia                        | Primary         | BM                  | 70        | 46, XY                                                                                                                                                                                                          | pos                   | neg                    |
| 2-014               | 3097    | M      | 50  | Acute promyelocytic leukemia with t(15;17); <i>PML-RARA</i> | Primary         | BM                  | 80        | 46, XX, del(6)(q?), t(15;17)(q24;q21)                                                                                                                                                                           | neg                   | neg                    |
| 2-015 <sup>2</sup>  | 3361    | F      | 35  | AML NOS with maturation                                     | Primary         | PB                  | 79        | 46, XX                                                                                                                                                                                                          | pos                   | pos                    |
| 2-016               | 3370    | F      | 57  | AML NOS with maturation                                     | Relapse         | PB                  | 82        | 46, XX, del(17)(p11)                                                                                                                                                                                            | pos                   | pos                    |
| 2-018 <sup>2</sup>  | 3361    | F      | 36  | AML NOS with maturation                                     | Relapse         | BM                  | 90        | no metaphases                                                                                                                                                                                                   | pos                   | pos                    |
| 2-019               | 3714    | F      | 66  | AML NOS with minimal differentiation                        | Primary         | BM                  | 80        | 45-46, XX, ?inv(3)(p?q?), 4, add(5)(q1?2), der(9)t(4;9)(q21;q34), ?dic(11;?)(p1?2;?), add(12)(p13), der(12)add(12)(p?)del(12)(q22), add(14)(q13), -17, del(17)(q21), +1-2mar[19]/46,XX[1]                       | neg                   | neg                    |
| 2-020               | 3778    | F      | 41  | AML with myelodysplasia-related changes                     | Primary         | PB                  | 25        | 47, XX, +8, add(8)(q24), del(12)(p13), i(17)(q10)                                                                                                                                                               | neg                   | neg                    |
| 2-021               | 3870    | M      | 50  | AML NOS with maturation                                     | Primary         | BM                  | 27        | 47, XY, +8                                                                                                                                                                                                      | neg                   | neg                    |
| 2-022               | 4072    | F      | 35  | Acute monoblastic/monocytic leukemia                        | Primary         | BM                  | 95        | 46, XX, der(11)t(11;11)(q13;q23) inv(11)(q13q23) t(11;19)(q23;p13), der(11)t(11;11)(q13;q23), del(12)(p13), der(19)t(11;19)(q23;p13)                                                                            | neg                   | neg                    |
| 2-023               | 4443    | F      | 57  | AML with mutated NPM1                                       | Primary         | BM                  | 82        | 46, XX                                                                                                                                                                                                          | pos                   | pos                    |
| 2-024               | 4690    | F      | 47  | Acute myelomonocytic leukemia                               | Primary         | BM                  | 45        | 46, XX                                                                                                                                                                                                          | neg                   | neg                    |
| 2-025               | 4716    | M      | 35  | AML NOS without maturation                                  | Primary         | BM                  | 98        | 45, XY, -7                                                                                                                                                                                                      | neg                   | neg                    |
| 2-027               | 5074    | M      | 63  | Acute monoblastic/monocytic leukemia                        | Primary         | PB                  | 55        | 47, XY, del(9)(q?11q?31), +20 / 46, XY, t(10;16)(q21;p13) / 48, XY, +3, +20                                                                                                                                     | neg                   | neg                    |
| 2-028               | 5205    | M      | 56  | AML NOS without maturation                                  | Primary         | PB                  | 39        | 46, XY                                                                                                                                                                                                          | neg                   | pos                    |
| 2-029               | 5444    | F      | 56  | AML with mutated NPM1                                       | Primary         | BM                  | 55        | 46, XX                                                                                                                                                                                                          | pos                   | pos                    |
| 2-030               | 5518    | F      | 59  | AML with mutated NPM1                                       | Primary         | BM                  | 95        | 46, XX                                                                                                                                                                                                          | pos                   | pos                    |
| 2-031 <sup>3</sup>  | 5672    | M      | 34  | AML with myelodysplasia-related changes                     | Primary         | BM                  | 40        | 46, XY                                                                                                                                                                                                          | pos                   | neg                    |
| 2-032 <sup>3</sup>  | 5672    | M      | 36  | AML with myelodysplasia-related changes                     | Relapse         | PB                  | 90        | 46, XY                                                                                                                                                                                                          | pos                   | neg                    |
| 2-033               | 6160    | M      | 63  | AML with mutated NPM1                                       | Primary         | BM                  | 99        | 46, XY                                                                                                                                                                                                          | pos                   | pos                    |
| 2-034               | 6395    | M      | 55  | AML with mutated NPM1                                       | Primary         | BM                  | 80        | 46, XY                                                                                                                                                                                                          | neg                   | pos                    |
| 2-035               | 6498    | F      | 42  | AML with mutated NPM1                                       | Primary         | PB                  | 94        | 46, XX                                                                                                                                                                                                          | pos                   | pos                    |
| 2-036 <sup>4</sup>  | 6588    | F      | 37  | AML with myelodysplasia-related changes                     | Primary         | BM                  | 36        | 46, XX                                                                                                                                                                                                          | pos                   | neg                    |
| 2-037               | 6619    | F      | 62  | AML with myelodysplasia-related changes                     | Primary         | BM                  | 20        | no metaphases                                                                                                                                                                                                   | neg                   | neg                    |
| 2-038               | 6711    | M      | 32  | AML NOS without maturation                                  | Primary         | BM                  | 94        | 47, XY, +10, der(16)t(16;21)del(16)(q12.1q24),                                                                                                                                                                  | neg                   | neg                    |

|                    |       |   |    |                                         |         |    |    |                                                                                                                                                        |     |     |
|--------------------|-------|---|----|-----------------------------------------|---------|----|----|--------------------------------------------------------------------------------------------------------------------------------------------------------|-----|-----|
|                    |       |   |    |                                         |         |    |    | der(21)t(16;21), (p11;q22).ish<br>der(16)t(16;21)<br>del(16)(q12.1q24)(3'CBFB-,<br>5'CBFB-,TUBB3+),<br>der(21)t(16;21)(p11;q22)(3'MYH11<br>+,5'MYH11+) |     |     |
| 2-039              | 6727  | F | 59 | AML NOS without maturation              | Primary | BM | 90 | 46, XX, del(9)(q1?3q3?4)                                                                                                                               | neg | neg |
| 2-040 <sup>4</sup> | 6588  | F | 38 | AML with myelodysplasia-related changes | Relapse | PB | 65 | 46, XX, t(1;16)(p22;q12)                                                                                                                               | pos | neg |
| 2-041              | 7015  | F | 73 | AML with mutated NPM1                   | Primary | BM | 90 | 46, XX                                                                                                                                                 | neg | pos |
| 2-043              | 8388  | F | 52 | AML with inv(16); <i>CBFB-MYH11</i>     | Primary | PB | 90 | 47, XX, del(7)(q31q36), +8,<br>inv(16)(p13q22)                                                                                                         | neg | neg |
| 2-044              | 9006  | M | 42 | AML with inv(16); <i>CBFB-MYH11</i>     | Primary | BM | 63 | 46, XY, inv(16)(p13q22)                                                                                                                                | neg | neg |
| 2-045              | 9217  | M | 49 | AML NOS without maturation              | Primary | BM | 92 | 46, XY                                                                                                                                                 | pos | neg |
| 2-046              | 9263  | F | 61 | AML with mutated NPM1                   | Primary | BM | 94 | 46, XX                                                                                                                                                 | pos | pos |
| 2-047              | 9388  | F | 22 | AML NOS without maturation              | Primary | BM | 92 | 46, XX, t(6;11)(q27;q23)                                                                                                                               | neg | neg |
| 2-048              | 9423  | M | 39 | AML with mutated NPM1                   | Primary | BM | 97 | 46, XY                                                                                                                                                 | neg | pos |
| 2-049              | 9448  | F | 37 | AML with mutated NPM1                   | Primary | PB | 77 | 46, XX                                                                                                                                                 | pos | pos |
| 2-050              | 9596  | M | 53 | Therapy-related AML                     | Primary | BM | 60 | 45, XY, -7                                                                                                                                             | neg | neg |
| 2-051              | 10024 | M | 68 | AML with mutated NPM1                   | Primary | BM | 98 | 46, XY                                                                                                                                                 | neg | pos |
| 2-052              | 10146 | M | 60 | AML with t(6;9); <i>DEK-NUP214</i>      | Primary | PB | 66 | 46, XY, t(6;9)(p22;q34)                                                                                                                                | pos | neg |
| 2-053              | 10170 | M | 27 | AML with inv(16); <i>CBFB-MYH11</i>     | Primary | PB | 75 | 46, XY, inv(16)(p13q22)                                                                                                                                | neg | neg |
| 2-054              | 10189 | F | 71 | AML NOS without maturation              | Primary | BM | 80 | 46, XX                                                                                                                                                 | neg | neg |
| 3-001              | 4768  | F | 55 | AML with t(9;11); <i>KMT2A-MLLT3</i>    | Primary | BM | 57 | 46, XX, t(9;11)(p22;q23)                                                                                                                               | neg | neg |
| 3-002              | 5233  | F | 38 | AML with t(8;21); <i>RUNX1-RUNX1T1</i>  | Primary | BM | 55 | 45, X, -X, t(8;21)(q22;q22)                                                                                                                            | neg | neg |
| 3-003              | 5818  | M | 41 | AML NOS without maturation              | Primary | BM | 52 | 45, XY, del(9)(q13q22)                                                                                                                                 | neg | neg |
| 3-004              | 5827  | M | 60 | AML with myelodysplasia-related changes | Primary | BM | 20 | 46, XY, idic(14)(p11)                                                                                                                                  | neg | neg |
| 3-005              | 5904  | M | 45 | AML with mutated NPM1                   | Primary | BM | 93 | 46, XY                                                                                                                                                 | pos | pos |
| 3-006              | 5905  | M | 57 | AML NOS without maturation              | Primary | BM | 55 | 47, XY, +X                                                                                                                                             | neg | neg |
| 3-007              | 5992  | M | 54 | AML with t(8;21); <i>RUNX1-RUNX1T1</i>  | Primary | BM | 24 | 47, XY, +4, t(8;21)(q22;q22)                                                                                                                           | neg | neg |
| 3-008              | 6033  | F | 50 | AML with t(9;11); <i>KMT2A-MLLT3</i>    | Primary | BM | 43 | 46, XX, t(9;11)(p21;q23)                                                                                                                               | neg | neg |
| 3-009              | 6089  | M | 60 | AML NOS without maturation              | Primary | BM | 85 | 46, XY                                                                                                                                                 | pos | pos |
| 3-010              | 6095  | F | 59 | Acute monoblastic/monocytic leukemia    | Primary | BM | 20 | 47, XX, +8, t(11;17)(q23;q21)                                                                                                                          | neg | neg |
| 3-011              | 6143  | M | 60 | AML with mutated NPM1                   | Primary | BM | 91 | 46, XY                                                                                                                                                 | pos | pos |
| 3-012              | 7012  | M | 54 | AML with mutated NPM1                   | Primary | BM | 90 | 46, XY                                                                                                                                                 | pos | pos |
| 3-013              | 7170  | F | 66 | AML with mutated NPM1                   | Primary | BM | 32 | 46, XX                                                                                                                                                 | neg | pos |
| 3-014              | 7255  | F | 44 | AML with inv(16); <i>CBFB-MYH11</i>     | Primary | BM | 35 | 47, XX, +X, inv(16)(p13q22)                                                                                                                            | neg | neg |
| 3-015              | 8156  | M | 58 | AML NOS with maturation                 | Primary | BM | 51 | 47, XY, dup(1)(q1?1q4?2),+8[7] /<br>46, XY,-17,<br>+mar1.ish (WCP17+)[3] /<br>46, XY, 17,<br>+mar2.ish(WCP17+)[4]                                      | neg | neg |
| 3-016              | 8228  | M | 59 | AML NOS without maturation              | Primary | BM | 77 | 49, XY, +8, +11, +21                                                                                                                                   | neg | neg |
| 3-017              | 8278  | F | 60 | Acute myelomonocytic leukemia           | Primary | BM | 50 | 46, XX                                                                                                                                                 | neg | neg |
| 3-018              | 8334  | M | 59 | AML NOS with maturation                 | Primary | BM | 23 | 46, XY                                                                                                                                                 | neg | neg |
| 3-019              | 8333  | F | 37 | AML with mutated NPM1                   | Primary | BM | 75 | 46, XX                                                                                                                                                 | neg | pos |
| 3-020              | 8391  | F | 72 | AML with mutated NPM1                   | Relapse | BM | 29 | 47, XX, +8                                                                                                                                             | pos | pos |
| 3-021 <sup>5</sup> | 8390  | F | 55 | AML with mutated NPM1                   | Primary | PB | 20 | 46, XX                                                                                                                                                 | neg | pos |
| 3-022              | 8524  | F | 30 | AML with myelodysplasia-related changes | Primary | BM | 43 | 45, XX, der(3)t(1;3)(q3?1;q2?5), -7                                                                                                                    | neg | neg |
| 3-023              | 8861  | M | 76 | AML with mutated NPM1                   | Primary | BM | 94 | 46, XY, t(1;10)(q31;q2?6)                                                                                                                              | neg | pos |
| 3-024              | 9516  | M | 65 | AML with myelodysplasia-related changes | Primary | BM | 25 | 45, X, -Y                                                                                                                                              | neg | neg |
| 3-025              | 9691  | M | 47 | AML with inv(16); <i>CBFB-MYH11</i>     | Primary | BM | 95 | 46, XY, t(9;11;17)(q22;q13;p13),<br>inv(16)(p13q22)                                                                                                    | neg | neg |
| 3-026              | 9750  | M | 64 | AML NOS with maturation                 | Primary | BM | 45 | 46, XY                                                                                                                                                 | pos | neg |
| 3-027              | 9770  | M | 65 | AML with mutated NPM1                   | Primary | BM | 70 | 46, XY                                                                                                                                                 | pos | pos |
| 3-028              | 9811  | F | 30 | Acute monoblastic/monocytic leukemia    | Primary | BM | 80 | 47, XX, +8                                                                                                                                             | pos | neg |
| 3-029              | 9978  | F | 47 | AML with inv(3); <i>GATA2, MECOM</i>    | Primary | BM | 60 | No metaphases. FISH: EVI1 break                                                                                                                        | neg | neg |
| 3-030              | 10232 | M | 69 | AML with myelodysplasia-related changes | Primary | BM | 25 | 48, XY, +8, +15                                                                                                                                        | neg | neg |
| 3-031              | 10297 | M | 71 | AML with myelodysplasia-related changes | Primary | BM | 70 | 46, XY, del(5)(q21q34)                                                                                                                                 | neg | neg |
| 3-032              | 10328 | F | 58 | AML with mutated NPM1                   | Primary | PB | 90 | 47, XX, add(5)(p15), +8                                                                                                                                | neg | pos |
| 3-033              | 10381 | F | 35 | Acute myelomonocytic leukemia           | Primary | PB | 23 | 45, X, -X                                                                                                                                              | neg | neg |
| 3-034              | 10418 | M | 53 | AML with mutated NPM1                   | Primary | BM | 98 | 46, XY                                                                                                                                                 | neg | pos |
| 3-035              | 10437 | M | 49 | AML with mutated NPM1                   | Primary | BM | 96 | 46, XY                                                                                                                                                 | pos | pos |
| 3-037              | 10594 | F | 64 | AML with mutated NPM1                   | Primary | BM | 80 | 46, XX                                                                                                                                                 | pos | pos |
| 3-038 <sup>5</sup> | 8390  | F | 60 | Therapy-related AML                     | Primary | BM | 13 | 48, XX, -7, +10, +19, +21                                                                                                                              | neg | neg |
| 3-039              | 10811 | M | 48 | AML with inv(16); <i>CBFB-MYH11</i>     | Primary | BM | 68 | 46, XY, add(7)(q?),<br>inv(16)(p13q22)                                                                                                                 | pos | neg |
| 3-040              | 10831 | M | 50 | AML NOS with maturation                 | Primary | BM | 48 | 46, XY                                                                                                                                                 | neg | neg |
| 3-041              | 10833 | F | 51 | AML with mutated NPM1                   | Primary | BM | 80 | 46, XX                                                                                                                                                 | pos | pos |
| 3-042              | 7055  | M | 56 | AML with myelodysplasia-related changes | Primary | BM | 25 | 46, XY                                                                                                                                                 | neg | neg |

<sup>1</sup> RNAseq analysis was performed in 3 batches as indicated by the first digit of each sample.

<sup>2, 3, 4</sup> Three pairs of primary and relapsed AML samples.

<sup>5</sup> A pair of primary AML and presumed subsequent therapy-related AML in the same patient.

<sup>6</sup> Recurrent fusion transcripts *CBFB-MYH11* inv(16)(p13q22), *KMT2A-MLLT3* t(9;11)(p21;q23), *RUNX1-RUNX1T1* t(8;21)(q22;q22) and *PML-RARA* t(15;17)(q24;q21) as well as chromosomal translocation *GATA2*, *MECOM* inv(3)(q21q26) were detected by fluorescence in situ hybridization (FISH) on 200 interphases per probe set.

<sup>7</sup> BM, bone marrow; PB, peripheral blood.

<sup>8</sup> AML karyotype was determined by metaphase cytogenetics of at least 20 metaphases per case.

<sup>9</sup> Genotyping for NPM1 hotspot mutations and FLT3-ITD was routinely performed by the accredited LUMC Laboratory of Special Hematology by PCR on genomic DNA followed by electrophoretic fragment size analysis.

**Table SII. Quality control of RNAseq data.**

| sample | num_raw fragments | num_qc fragments | num_total reads | Proportion reads aligned | proportion reads aligned pairs | avg_read length | Median insert size | num_total bases | Proportion mrna bases | Proportion intronic bases | Proportion intergenic bases |
|--------|-------------------|------------------|-----------------|--------------------------|--------------------------------|-----------------|--------------------|-----------------|-----------------------|---------------------------|-----------------------------|
| 1-001  | 54788265          | 53613331         | 107248211       | 0.94                     | 0.94                           | 123.85          | 167                | 13282804791     | 0.83                  | 0.14                      | 0.031                       |
| 1-002  | 53075245          | 51969312         | 103961552       | 0.95                     | 0.95                           | 123.81          | 169                | 12871338092     | 0.80                  | 0.17                      | 0.030                       |
| 1-003  | 53864742          | 52731725         | 105485637       | 0.95                     | 0.95                           | 123.86          | 169                | 13065206475     | 0.76                  | 0.20                      | 0.042                       |
| 1-004  | 59063396          | 57727265         | 115479999       | 0.94                     | 0.94                           | 123.90          | 167                | 14308267196     | 0.82                  | 0.15                      | 0.030                       |
| 1-005  | 61187215          | 59763235         | 119551529       | 0.95                     | 0.94                           | 123.87          | 170                | 14809066970     | 0.83                  | 0.14                      | 0.030                       |
| 1-006  | 70668030          | 68870967         | 137780396       | 0.95                     | 0.95                           | 123.85          | 168                | 17064602606     | 0.80                  | 0.17                      | 0.031                       |
| 1-007  | 55346361          | 54193453         | 108411531       | 0.93                     | 0.93                           | 123.93          | 165                | 13435214910     | 0.81                  | 0.16                      | 0.037                       |
| 1-008  | 66197432          | 64909956         | 129850843       | 0.96                     | 0.96                           | 124.02          | 168                | 16104746802     | 0.80                  | 0.17                      | 0.029                       |
| 2-001  | 56506334          | 55591220         | 111202194       | 0.95                     | 0.95                           | 123.33          | 173                | 13714190090     | 0.83                  | 0.14                      | 0.027                       |
| 2-002  | 57280209          | 56242701         | 112511142       | 0.94                     | 0.93                           | 123.64          | 177                | 13910591773     | 0.76                  | 0.21                      | 0.031                       |
| 2-003  | 57821980          | 56893162         | 113805150       | 0.93                     | 0.93                           | 123.32          | 176                | 14034305270     | 0.73                  | 0.24                      | 0.033                       |
| 2-004  | 53495171          | 52681112         | 105387311       | 0.94                     | 0.94                           | 123.58          | 174                | 13023576646     | 0.86                  | 0.11                      | 0.027                       |
| 2-005  | 62540695          | 61479035         | 122989969       | 0.95                     | 0.95                           | 123.70          | 169                | 15214437493     | 0.87                  | 0.11                      | 0.022                       |
| 2-006  | 64236869          | 63200016         | 126425295       | 0.94                     | 0.94                           | 123.49          | 175                | 15612222336     | 0.79                  | 0.17                      | 0.037                       |
| 2-007  | 53098093          | 52236602         | 104500304       | 0.94                     | 0.93                           | 123.64          | 172                | 12920631494     | 0.87                  | 0.10                      | 0.027                       |
| 2-008  | 59042306          | 57969023         | 115964551       | 0.95                     | 0.94                           | 123.52          | 173                | 14323391338     | 0.80                  | 0.17                      | 0.030                       |
| 2-009  | 50992079          | 50170952         | 100365594       | 0.93                     | 0.93                           | 123.71          | 165                | 12416636439     | 0.84                  | 0.12                      | 0.032                       |
| 2-010  | 65099763          | 64021562         | 128075199       | 0.95                     | 0.95                           | 123.40          | 163                | 15805031281     | 0.83                  | 0.14                      | 0.024                       |
| 2-011  | 73743726          | 72409403         | 144854215       | 0.94                     | 0.94                           | 123.70          | 170                | 17918060885     | 0.80                  | 0.17                      | 0.029                       |
| 2-012  | 67096731          | 66070319         | 132168330       | 0.94                     | 0.94                           | 123.60          | 168                | 16336605515     | 0.83                  | 0.15                      | 0.026                       |
| 2-013  | 62658949          | 61576479         | 123175793       | 0.94                     | 0.93                           | 123.59          | 177                | 15223008708     | 0.82                  | 0.15                      | 0.032                       |
| 2-014  | 52593372          | 51581084         | 103180228       | 0.78                     | 0.78                           | 123.56          | 167                | 12748875404     | 0.83                  | 0.14                      | 0.028                       |
| 2-015  | 61512621          | 60502601         | 121032998       | 0.93                     | 0.93                           | 123.38          | 172                | 14932730855     | 0.83                  | 0.14                      | 0.032                       |
| 2-016  | 51446976          | 50588327         | 101198501       | 0.94                     | 0.94                           | 123.35          | 173                | 12482697291     | 0.87                  | 0.11                      | 0.026                       |
| 2-018  | 60224629          | 59274153         | 118571640       | 0.94                     | 0.94                           | 123.35          | 165                | 14625570924     | 0.72                  | 0.23                      | 0.053                       |
| 2-019  | 85577511          | 84334072         | 168706819       | 0.96                     | 0.95                           | 124.10          | 163                | 20936045029     | 0.85                  | 0.12                      | 0.029                       |
| 2-020  | 65608004          | 64526871         | 129084997       | 0.94                     | 0.94                           | 123.44          | 162                | 15933769735     | 0.82                  | 0.15                      | 0.029                       |
| 2-021  | 69052152          | 67971793         | 135978779       | 0.93                     | 0.93                           | 123.30          | 165                | 16766123665     | 0.84                  | 0.14                      | 0.027                       |
| 2-022  | 53165468          | 52333635         | 104692895       | 0.96                     | 0.96                           | 123.97          | 160                | 12979187074     | 0.84                  | 0.13                      | 0.027                       |
| 2-023  | 70094054          | 68770687         | 137572258       | 0.94                     | 0.94                           | 123.16          | 170                | 16943761374     | 0.79                  | 0.17                      | 0.038                       |
| 2-024  | 65824057          | 64716945         | 129465744       | 0.95                     | 0.95                           | 123.92          | 163                | 16043645622     | 0.84                  | 0.13                      | 0.026                       |
| 2-025  | 67282583          | 66137463         | 132305455       | 0.93                     | 0.93                           | 123.28          | 163                | 16310074314     | 0.86                  | 0.11                      | 0.030                       |
| 2-027  | 68055617          | 66866063         | 133760110       | 0.96                     | 0.96                           | 123.39          | 163                | 16504966201     | 0.73                  | 0.23                      | 0.035                       |
| 2-028  | 51405680          | 50599116         | 101219282       | 0.95                     | 0.95                           | 123.91          | 165                | 12541820293     | 0.84                  | 0.14                      | 0.026                       |
| 2-029  | 72743917          | 71613897         | 143258798       | 0.96                     | 0.96                           | 124.07          | 163                | 17774685182     | 0.83                  | 0.15                      | 0.023                       |
| 2-030  | 52278151          | 51354414         | 102730947       | 0.95                     | 0.95                           | 123.67          | 163                | 12704664569     | 0.82                  | 0.15                      | 0.036                       |
| 2-031  | 56091225          | 55139771         | 110303186       | 0.94                     | 0.93                           | 123.66          | 166                | 13639694704     | 0.82                  | 0.15                      | 0.031                       |
| 2-032  | 51047572          | 50203249         | 100426680       | 0.93                     | 0.93                           | 123.82          | 172                | 12434347703     | 0.77                  | 0.19                      | 0.038                       |
| 2-033  | 58622449          | 57735149         | 115494969       | 0.95                     | 0.95                           | 123.89          | 166                | 14309217897     | 0.81                  | 0.15                      | 0.037                       |
| 2-034  | 81508674          | 80169841         | 160372609       | 0.96                     | 0.96                           | 123.17          | 167                | 19753385968     | 0.83                  | 0.14                      | 0.028                       |
| 2-035  | 67361084          | 66270584         | 132569286       | 0.95                     | 0.95                           | 123.92          | 163                | 16428547132     | 0.69                  | 0.26                      | 0.051                       |
| 2-036  | 73002305          | 71822945         | 143681853       | 0.93                     | 0.93                           | 123.98          | 161                | 17814008303     | 0.77                  | 0.19                      | 0.035                       |
| 2-037  | 55154252          | 54370907         | 108767647       | 0.94                     | 0.95                           | 123.68          | 163                | 13452436847     | 0.79                  | 0.18                      | 0.030                       |
| 2-038  | 49643625          | 48891031         | 97801049        | 0.93                     | 0.93                           | 123.96          | 160                | 12123701712     | 0.77                  | 0.19                      | 0.033                       |
| 2-039  | 55701447          | 54891057         | 109804914       | 0.94                     | 0.94                           | 124.07          | 160                | 13623522546     | 0.83                  | 0.13                      | 0.032                       |
| 2-040  | 68419629          | 67379627         | 134790642       | 0.94                     | 0.94                           | 123.12          | 167                | 16595306380     | 0.83                  | 0.14                      | 0.036                       |
| 2-041  | 52605994          | 51777425         | 103574129       | 0.95                     | 0.95                           | 124.02          | 162                | 12845612847     | 0.82                  | 0.15                      | 0.024                       |
| 2-043  | 49868994          | 49185326         | 98391810        | 0.94                     | 0.94                           | 123.95          | 162                | 12196096087     | 0.78                  | 0.19                      | 0.032                       |
| 2-044  | 53991414          | 53213714         | 106452709       | 0.94                     | 0.94                           | 123.71          | 161                | 13168990553     | 0.86                  | 0.12                      | 0.025                       |
| 2-045  | 51265509          | 50462809         | 100952097       | 0.93                     | 0.93                           | 124.00          | 164                | 12518515531     | 0.81                  | 0.17                      | 0.026                       |
| 2-046  | 56944242          | 56060382         | 112145666       | 0.95                     | 0.95                           | 123.76          | 162                | 13879365217     | 0.83                  | 0.14                      | 0.026                       |
| 2-047  | 49025083          | 48313248         | 96650064        | 0.93                     | 0.93                           | 123.88          | 161                | 11972882123     | 0.83                  | 0.14                      | 0.034                       |
| 2-048  | 51073901          | 50351791         | 100724042       | 0.92                     | 0.91                           | 123.89          | 158                | 12479013426     | 0.84                  | 0.13                      | 0.028                       |
| 2-049  | 49872940          | 49145220         | 98307022        | 0.94                     | 0.94                           | 123.92          | 162                | 12182371921     | 0.86                  | 0.11                      | 0.024                       |
| 2-050  | 49697953          | 48943181         | 97908977        | 0.93                     | 0.93                           | 123.99          | 160                | 12139486114     | 0.84                  | 0.13                      | 0.029                       |
| 2-051  | 55208849          | 54361755         | 108745947       | 0.94                     | 0.94                           | 123.94          | 164                | 13477848064     | 0.79                  | 0.17                      | 0.036                       |

|       |          |          |           |      |      |        |     |             |      |      |       |
|-------|----------|----------|-----------|------|------|--------|-----|-------------|------|------|-------|
| 2-052 | 57596568 | 56525637 | 113075546 | 0.93 | 0.93 | 123.57 | 163 | 13973158591 | 0.84 | 0.14 | 0.029 |
| 2-053 | 75023217 | 73884797 | 147805514 | 0.94 | 0.94 | 124.01 | 163 | 18328798752 | 0.85 | 0.13 | 0.024 |
| 2-054 | 57384643 | 56619199 | 113262879 | 0.92 | 0.92 | 124.17 | 161 | 14063974445 | 0.81 | 0.16 | 0.033 |
| 3-001 | 52693870 | 51820595 | 103659832 | 0.94 | 0.94 | 123.24 | 153 | 12774598770 | 0.86 | 0.12 | 0.026 |
| 3-002 | 51276208 | 50337961 | 100699745 | 0.93 | 0.93 | 123.58 | 152 | 12444322586 | 0.85 | 0.12 | 0.027 |
| 3-003 | 50071690 | 49389172 | 98797507  | 0.95 | 0.95 | 123.68 | 151 | 12219077782 | 0.87 | 0.10 | 0.028 |
| 3-004 | 50781816 | 50119289 | 100258711 | 0.95 | 0.95 | 123.67 | 153 | 12398825316 | 0.83 | 0.14 | 0.026 |
| 3-005 | 53280275 | 52233351 | 104486687 | 0.95 | 0.95 | 123.45 | 152 | 12899004771 | 0.81 | 0.16 | 0.032 |
| 3-006 | 54427152 | 53585671 | 107197691 | 0.95 | 0.94 | 123.53 | 154 | 13241887450 | 0.83 | 0.14 | 0.029 |
| 3-007 | 53348958 | 52517130 | 105053120 | 0.95 | 0.94 | 123.66 | 151 | 12990586544 | 0.89 | 0.09 | 0.023 |
| 3-008 | 73716517 | 72568509 | 145164059 | 0.95 | 0.95 | 123.54 | 154 | 17933342116 | 0.80 | 0.17 | 0.030 |
| 3-009 | 68943807 | 67744669 | 135511083 | 0.95 | 0.95 | 123.52 | 149 | 16738035423 | 0.78 | 0.18 | 0.039 |
| 3-010 | 51212748 | 50452254 | 100923621 | 0.94 | 0.94 | 123.67 | 150 | 12481096240 | 0.85 | 0.12 | 0.027 |
| 3-011 | 51651751 | 50869417 | 101757986 | 0.95 | 0.95 | 123.50 | 152 | 12567173340 | 0.86 | 0.11 | 0.030 |
| 3-012 | 61175770 | 60140402 | 120304899 | 0.95 | 0.94 | 123.67 | 152 | 14877660939 | 0.85 | 0.12 | 0.030 |
| 3-013 | 56726988 | 55853626 | 111732282 | 0.95 | 0.95 | 123.56 | 152 | 13806042804 | 0.85 | 0.12 | 0.026 |
| 3-014 | 52517794 | 51676464 | 103376769 | 0.96 | 0.96 | 123.61 | 153 | 12778228965 | 0.86 | 0.11 | 0.024 |
| 3-015 | 52345490 | 51448743 | 102920197 | 0.95 | 0.95 | 123.55 | 152 | 12715610283 | 0.80 | 0.16 | 0.034 |
| 3-016 | 60983733 | 60059701 | 120154802 | 0.94 | 0.94 | 123.29 | 154 | 14813668446 | 0.78 | 0.19 | 0.027 |
| 3-017 | 59617322 | 58641675 | 117306726 | 0.95 | 0.95 | 123.44 | 150 | 14480399479 | 0.85 | 0.12 | 0.024 |
| 3-018 | 50433250 | 49688464 | 99397881  | 0.95 | 0.95 | 123.45 | 151 | 12271158369 | 0.83 | 0.14 | 0.029 |
| 3-019 | 55644436 | 54693377 | 109409004 | 0.95 | 0.95 | 123.44 | 153 | 13505775375 | 0.79 | 0.18 | 0.028 |
| 3-020 | 53109065 | 52186743 | 104400446 | 0.94 | 0.94 | 123.51 | 154 | 12894964817 | 0.79 | 0.19 | 0.029 |
| 3-021 | 55601520 | 54535952 | 109094019 | 0.95 | 0.95 | 123.40 | 154 | 13462279338 | 0.81 | 0.16 | 0.028 |
| 3-022 | 51610206 | 50530261 | 101078815 | 0.96 | 0.95 | 123.52 | 151 | 12485515754 | 0.80 | 0.17 | 0.035 |
| 3-023 | 51680125 | 50918651 | 101868266 | 0.94 | 0.94 | 123.64 | 152 | 12595202498 | 0.79 | 0.18 | 0.030 |
| 3-024 | 55043453 | 54262574 | 108551342 | 0.96 | 0.96 | 123.48 | 153 | 13404458026 | 0.73 | 0.24 | 0.029 |
| 3-025 | 56669383 | 55913456 | 111850763 | 0.95 | 0.94 | 123.70 | 152 | 13836183097 | 0.87 | 0.11 | 0.021 |
| 3-026 | 68421663 | 67377624 | 134781737 | 0.95 | 0.94 | 123.89 | 153 | 16698486905 | 0.82 | 0.15 | 0.030 |
| 3-027 | 64506711 | 63685395 | 127398266 | 0.94 | 0.94 | 123.99 | 153 | 15796396507 | 0.85 | 0.12 | 0.029 |
| 3-028 | 67922615 | 67079769 | 134189759 | 0.93 | 0.93 | 123.99 | 154 | 16638085793 | 0.85 | 0.12 | 0.029 |
| 3-029 | 64180589 | 63284193 | 126594559 | 0.95 | 0.95 | 123.96 | 153 | 15692048156 | 0.84 | 0.13 | 0.031 |
| 3-030 | 60882308 | 60078433 | 120181141 | 0.96 | 0.95 | 123.91 | 155 | 14891563505 | 0.83 | 0.14 | 0.031 |
| 3-031 | 64946578 | 64012042 | 128051805 | 0.95 | 0.95 | 123.84 | 154 | 15858172077 | 0.81 | 0.15 | 0.034 |
| 3-032 | 84482231 | 83460133 | 166960125 | 0.95 | 0.95 | 124.12 | 154 | 20722663993 | 0.83 | 0.14 | 0.028 |
| 3-033 | 57977219 | 57097996 | 114219954 | 0.96 | 0.96 | 123.83 | 156 | 14143885179 | 0.82 | 0.15 | 0.025 |
| 3-034 | 70809403 | 69843449 | 139712362 | 0.94 | 0.94 | 123.95 | 153 | 17317144601 | 0.87 | 0.10 | 0.029 |
| 3-035 | 69381515 | 68321472 | 136671779 | 0.95 | 0.95 | 123.62 | 156 | 16895415499 | 0.74 | 0.22 | 0.038 |
| 3-037 | 75282940 | 74299148 | 148624447 | 0.96 | 0.96 | 123.89 | 156 | 18412998865 | 0.81 | 0.16 | 0.037 |
| 3-038 | 77419245 | 76225741 | 152487359 | 0.95 | 0.95 | 123.87 | 163 | 18888817283 | 0.86 | 0.11 | 0.023 |
| 3-039 | 62188369 | 61221821 | 122470593 | 0.95 | 0.95 | 123.86 | 152 | 15168607460 | 0.86 | 0.12 | 0.025 |
| 3-040 | 58196485 | 57288503 | 114599655 | 0.94 | 0.94 | 123.62 | 160 | 14166312677 | 0.84 | 0.13 | 0.026 |
| 3-041 | 65105632 | 64207973 | 128443731 | 0.94 | 0.94 | 123.93 | 153 | 15918553488 | 0.91 | 0.07 | 0.020 |
| 3-042 | 68458272 | 67413990 | 134855727 | 0.95 | 0.94 | 123.92 | 154 | 16711626552 | 0.83 | 0.13 | 0.033 |

**Table SIII. Detection of fusion transcripts with corresponding structural abnormalities by metaphase cytogenetics.**

| Sample | Fusion Genes  | JR <sup>1</sup> | SF <sup>2</sup> | Left GRCh38 <sup>3</sup> | Right GRCh38 <sup>4</sup> | Validation <sup>5</sup> | Fusion Protein <sup>6</sup> | Cytogenetics      |
|--------|---------------|-----------------|-----------------|--------------------------|---------------------------|-------------------------|-----------------------------|-------------------|
| 1-001  | KMT2A-MLL3    | 9               | 8               | chr11:118484314          | chr9:20365744             | Sanger                  | NRF-NRF                     | t(9;11)(p21;q23)  |
|        | KMT2A-MLL3    | 12              | 8               | chr11:118484975          | chr9:20365744             | Sanger                  | NRF-NRF                     |                   |
| 1-004  | CBFB-MYH11    | 69              | 12              | chr16:67082308           | chr16:15721051            | Sanger                  | NRF-NRF                     | inv(16)(p13q22)   |
| 1-007  | RUNX1-RUNX1T1 | 32              | 9               | chr21:34859474           | chr8:92017363             | Sanger                  | NRF-NRF                     | t(8;21)(q22;q22)  |
|        | RUNX1-RUNX1T1 | 4               | 9               | chr21:34859474           | chr8:92062709             | Sanger                  | NRF- <b>ARF</b>             |                   |
| 2-004  | CBFB-MYH11    | 67              | 8               | chr16:67082308           | chr16:15721051            | Sanger                  | NRF-NRF                     | inv(16)(p13q22)   |
| 2-005  | KMT2A-MLL3    | 8               | 1               | chr11:118484314          | chr9:20414425             | NGS                     | NRF-NRF                     | t(9;11)(p21;q23)  |
|        | KMT2A-MLL3    | 3               | 1               | chr11:118484975          | chr9:20414425             | gel electrophoresis     | NRF-NRF                     |                   |
| 2-006  | PML-RARA      | 40              | 9               | chr15:74023408           | chr17:40348316            | Sanger                  | NRF-NRF                     | t(15;17)(q24;q21) |
|        | RARA-PML      | 87              | 16              | chr17:40331396           | chr15:74024857            | Sanger                  | NRF-NRF                     |                   |
| 2-007  | CBFB-MYH11    | 42              | 10              | chr16:67082308           | chr16:15721051            | gel electrophoresis     | NRF-NRF                     | inv(16)(p13q22)   |
| 2-010  | CBFB-MYH11    | 41              | 4               | chr16:67082308           | chr16:15724992            | gel electrophoresis     | NRF-NRF                     | inv(16)(p13q22)   |
| 2-014  | PML-RARA      | 1               | 3               | chr15:74023408           | chr17:40348316            | not detected            | NRF-NRF                     | t(15;17)(q24;q21) |
|        | PML-RARA      | 4               | 3               | chr15:74024927           | chr17:40348316            | gel electrophoresis     | NRF- <b>ARF</b>             |                   |
|        | PML-RARA      | 7               | 3               | chr15:74033231           | chr17:40334191            | Sanger                  | NRF- <b>ARF</b>             |                   |
|        | RARA-PML      | 10              | 2               | chr17:40331396           | chr15:74034478            | Sanger                  | NRF-NRF                     |                   |
| 2-022  | KMT2A-MLL3    | 8               | 3               | chr11:118484314          | chr19:6270759             | Sanger                  | NRF-NRF                     | t(11;19)(q23;p13) |
| 2-038  | ERG-FUS       | 12              | 5               | chr21:38390995           | chr16:31188325            | Sanger                  | NRF-NRF                     | t(16;21)(p11;q22) |
|        | FUS-ERG       | 46              | 9               | chr16:31186836           | chr21:38383923            | Sanger                  | NRF-NRF                     |                   |
| 2-043  | CBFB-MYH11    | 30              | 3               | chr16:67082308           | chr16:15721051            | n.d.                    | NRF-NRF                     | inv(16)(p13q22)   |
| 2-044  | CBFB-MYH11    | 28              | 5               | chr16:67082308           | chr16:15721051            | n.d.                    | NRF-NRF                     | inv(16)(p13q22)   |
| 2-047  | KMT2A-MLL3    | 17              | 3               | chr11:118482495          | chr6:167864551            | gel electrophoresis     | NRF-NRF                     | t(6;11)(q27;q23)  |
| 2-052  | DEK-NUP214    | 12              | 0               | chr6:18236452            | chr9:131159383            | Sanger                  | NRF-NRF                     | t(6;9)(p22;q34)   |
|        | NUP214-DEK    | 6               | 1               | chr9:131151894           | chr6:18226242             | Sanger                  | NRF-NRF                     |                   |
| 2-053  | CBFB-MYH11    | 59              | 7               | chr16:67082308           | chr16:15721051            | n.d.                    | NRF-NRF                     | inv(16)(p13q22)   |
| 3-001  | KMT2A-MLL3    | 3               | 0               | chr11:118484314          | chr9:20365744             | Sanger                  | NRF-NRF                     | t(9;11)(p21;q23)  |
| 3-002  | RUNX1-RUNX1T1 | 51              | 12              | chr21:34859474           | chr8:92017363             | Sanger                  | NRF-NRF                     | t(8;21)(q22;q22)  |
|        | RUNX1-RUNX1T1 | 9               | 12              | chr21:34859474           | chr8:92062709             | Sanger                  | NRF- <b>ARF</b>             |                   |
| 3-007  | RUNX1-RUNX1T1 | 19              | 5               | chr21:34859474           | chr8:92017363             | Sanger                  | NRF-NRF                     | t(8;21)(q22;q22)  |
|        | RUNX1-RUNX1T1 | 5               | 5               | chr21:34859474           | chr8:92062709             | Sanger                  | NRF- <b>ARF</b>             |                   |
| 3-008  | KMT2A-MLL3    | 15              | 2               | chr11:118484314          | chr9:20365744             | Sanger                  | NRF-NRF                     | t(9;11)(p21;q23)  |
|        | KMT2A-MLL3    | 4               | 2               | chr11:118484975          | chr9:20365744             | Sanger                  | NRF-NRF                     |                   |
| 3-010  | KMT2A-MLL3    | 3               | 0               | chr11:118481953          | chr17:38717270            | NGS                     | NRF- <b>ARF</b>             | t(11;17)(q23;q21) |
|        | KMT2A-MLL3    | 2               | 0               | chr11:118480238          | chr17:38717432            | n.d.                    | NRF-NRF                     |                   |
| 3-014  | CBFB-MYH11    | 41              | 8               | chr16:67082308           | chr16:15721051            | n.d.                    | NRF-NRF                     | inv(16)(p13q22)   |
| 3-025  | CBFB-MYH11    | 35              | 4               | chr16:67082308           | chr16:15721051            | n.d.                    | NRF-NRF                     | inv(16)(p13q22)   |
| 3-039  | CBFB-MYH11    | 46              | 3               | chr16:67082308           | chr16:15727054            | gel electrophoresis     | NRF-NRF                     | inv(16)(p13q22)   |
|        | CBFB-MYH11    | 5               | 3               | chr16:67082339           | chr16:15727054            | gel electrophoresis     | NRF- <b>ARF</b>             |                   |

<sup>1</sup> JR; junction reads; single reads containing sequences of two different genes.

<sup>2</sup> SF; spanning fragments; read pairs containing sequences of two different genes.

<sup>3</sup> Left GRCh38; position of the 3' end of the upstream gene in the fusion transcript after alignment to the GRCh38 genome.

<sup>4</sup> Right GRCh38; position of the 5' end of the downstream gene in the fusion transcript after alignment to the GRCh38 genome.

<sup>5</sup> Fusion transcripts were validated by RT-PCR and fragment size analysis by gel electrophoresis and in some instances by Sanger or NGS. Primers used for validation are shown in Table SV. n.d.; not determined.

<sup>6</sup> Indicated whether the downstream fusion partner in the transcript is translated in the normal reading frame (NRF) or alternative reading frame (ARF).

**Table SIV. Sensitivity of HAMLET to detect fusion genes at different sequencing depths<sup>1</sup>.**

| Sample | Fusion Genes  | Left GRCh38 <sup>2</sup> | Right GRCh38 <sup>3</sup> | 20M | 30M  | 40M  | 47.5M |
|--------|---------------|--------------------------|---------------------------|-----|------|------|-------|
| 1-001  | KMT2A-MLLT3   | chr11:118484314          | chr9:20365744             | +   | n.d. | n.d. | n.d.  |
|        | KMT2A-MLLT3   | chr11:118484975          | chr9:20365744             | +   | n.d. | n.d. | n.d.  |
| 1-004  | CBFB-MYH11    | chr16:67082308           | chr16:15721051            | +   | n.d. | n.d. | n.d.  |
| 1-007  | RUNX1-RUNX1T1 | chr21:34859474           | chr8:92017363             | +   | n.d. | n.d. | n.d.  |
|        | RUNX1-RUNX1T1 | chr21:34859474           | chr8:92062709             | +   | n.d. | n.d. | n.d.  |
| 2-004  | CBFB-MYH11    | chr16:67082308           | chr16:15721051            | +   | n.d. | n.d. | n.d.  |
| 2-005  | KMT2A-MLLT3   | chr11:118484314          | chr9:20414425             | -   | +    | n.d. | n.d.  |
|        | KMT2A-MLLT3   | chr11:118484975          | chr9:20414425             | -   | -    | -    | +     |
| 2-006  | PML-RARA      | chr15:74023408           | chr17:40348316            | +   | n.d. | n.d. | n.d.  |
|        | RARA-PML      | chr17:40331396           | chr15:74024857            | +   | n.d. | n.d. | n.d.  |
| 2-007  | CBFB-MYH11    | chr16:67082308           | chr16:15721051            | +   | n.d. | n.d. | n.d.  |
| 2-010  | CBFB-MYH11    | chr16:67082308           | chr16:15724992            | +   | n.d. | n.d. | n.d.  |
| 2-014  | PML-RARA      | chr15:74023408           | chr17:40348316            | -   | -    | +    | n.d.  |
|        | PML-RARA      | chr15:74024927           | chr17:40348316            | +   | n.d. | n.d. | n.d.  |
|        | PML-RARA      | chr15:74033231           | chr17:40334191            | -   | -    | +    | n.d.  |
|        | RARA-PML      | chr17:40331396           | chr15:74034478            | +   | n.d. | n.d. | n.d.  |
| 2-022  | KMT2A-MLLT1   | chr11:118484314          | chr19:6270759             | +   | n.d. | n.d. | n.d.  |
| 2-038  | ERG-FUS       | chr21:38390995           | chr16:31188325            | +   | n.d. | n.d. | n.d.  |
|        | FUS-ERG       | chr16:31186836           | chr21:38383923            | +   | n.d. | n.d. | n.d.  |
| 2-043  | CBFB-MYH11    | chr16:67082308           | chr16:15721051            | +   | n.d. | n.d. | n.d.  |
| 2-044  | CBFB-MYH11    | chr16:67082308           | chr16:15721051            | +   | n.d. | n.d. | n.d.  |
| 2-047  | KMT2A-MLLT4   | chr11:118482495          | chr6:167864551            | +   | n.d. | n.d. | n.d.  |
| 2-052  | DEK-NUP214    | chr6:18236452            | chr9:131159383            | +   | n.d. | n.d. | n.d.  |
|        | NUP214-DEK    | chr9:131151894           | chr6:18226242             | +   | n.d. | n.d. | n.d.  |
| 2-053  | CBFB-MYH11    | chr16:67082308           | chr16:15721051            | +   | n.d. | n.d. | n.d.  |
| 3-001  | KMT2A-MLLT3   | chr11:118484314          | chr9:20365744             | -   | -    | +    | n.d.  |
| 3-002  | RUNX1-RUNX1T1 | chr21:34859474           | chr8:92017363             | +   | n.d. | n.d. | n.d.  |
|        | RUNX1-RUNX1T1 | chr21:34859474           | chr8:92062709             | +   | n.d. | n.d. | n.d.  |
| 3-007  | RUNX1-RUNX1T1 | chr21:34859474           | chr8:92017363             | +   | n.d. | n.d. | n.d.  |
|        | RUNX1-RUNX1T1 | chr21:34859474           | chr8:92062709             | +   | n.d. | n.d. | n.d.  |
| 3-008  | KMT2A-MLLT3   | chr11:118484314          | chr9:20365744             | +   | n.d. | n.d. | n.d.  |
|        | KMT2A-MLLT3   | chr11:118484975          | chr9:20365744             | +   | n.d. | n.d. | n.d.  |
| 3-010  | KMT2A-MLLT6   | chr11:118481953          | chr17:38717270            | -   | +    | n.d. | n.d.  |
|        | KMT2A-MLLT6   | chr11:118480238          | chr17:38717432            | +   | n.d. | n.d. | n.d.  |
| 3-014  | CBFB-MYH11    | chr16:67082308           | chr16:15721051            | +   | n.d. | n.d. | n.d.  |
| 3-025  | CBFB-MYH11    | chr16:67082308           | chr16:15721051            | +   | n.d. | n.d. | n.d.  |
| 3-039  | CBFB-MYH11    | chr16:67082308           | chr16:15727054            | +   | n.d. | n.d. | n.d.  |
|        | CBFB-MYH11    | chr16:67082339           | chr16:15727054            | +   | n.d. | n.d. | n.d.  |

<sup>1</sup> Number of read pairs were downscaled for each sample to 47.5, 40, 30 and 20 million. HAMLET was first run on all samples with 20 million read pairs followed by analysis with 30, 40 and 47.5 million read pairs for those fusions that were not detected with 20 million read pairs. The sequential analysis was stopped upon detection of the fusion. Fusions that were detected (+) are indicated in blue, and fusions that were not detected (-) are shown in orange. n.d.; not determined.

<sup>2</sup> Left GRCh38; 3' end of the upstream gene in the fusion transcript after alignment to the GRCh38 genome.

<sup>3</sup> Right GRCh38; 5' end of the downstream gene in the fusion transcript after alignment.

**Table SV. Detection of fusion transcripts without corresponding structural abnormalities by metaphase cytogenetics.**

| Sample        | Fusion Genes     | JR <sup>1</sup> | SF <sup>2</sup> | Left GRCh38 <sup>3</sup> | Right GRCh38 <sup>4</sup> | Validation <sup>5</sup> | Fusion Protein <sup>6</sup> | Cytogenetics                                                                                                                                                                                              |
|---------------|------------------|-----------------|-----------------|--------------------------|---------------------------|-------------------------|-----------------------------|-----------------------------------------------------------------------------------------------------------------------------------------------------------------------------------------------------------|
| 1-001         | YWHAZ--KLF10     | 2               | 0               | chr8:100951929           | chr8:102652397            | not detected            | No <sup>7</sup>             | 46,XX,t(9;11)(p21;q23)                                                                                                                                                                                    |
| 1-002         | TPM4--KLF2       | 5               | 1               | chr19:16076697           | chr19:16326856            | n.d.                    | NRF-ARF                     | 46,XX                                                                                                                                                                                                     |
| 1-003         | TPM4--KLF2       | 6               | 0               | chr19:16076697           | chr19:16326856            | n.d.                    | NRF-ARF                     | 46,XX                                                                                                                                                                                                     |
| 1-004         | TPM4--KLF2       | 7               | 1               | chr19:16076697           | chr19:16326856            | n.d.                    | NRF-ARF                     | 46,XY,inv(16)(p13q22)                                                                                                                                                                                     |
|               | C15orf57--CBX3   | 3               | 1               | chr15:40561981           | chr7:26201745             | n.d.                    | No                          |                                                                                                                                                                                                           |
| 1-005         | REXO1--LUC7L3    | 21              | 6               | chr19:1848202            | chr17:50736960            | n.d.                    | NRF-ARF                     | 46,XY,inv(3)(q21q26), del(7)(q21), -17,der(19) t(17;19)(q22;q13)/46-48,XY,del(2)(p21)[8], -3[9],del(3)(q23)[8], +6[6], -7[8], del(11)(p1?3[9]), add(12)(p11)[9], inv(15)(q?13q?23)[6], +ring[8], +mar1[8] |
|               | STRAP--BCL6      | 16              | 4               | chr12:15882819           | chr3:187734907            | n.d.                    | NRF-ARF                     |                                                                                                                                                                                                           |
|               | RBM6--DOCK3      | 4               | 2               | chr3:49975392            | chr3:51356407             | n.d.                    | NRF-ARF                     |                                                                                                                                                                                                           |
|               | C15orf57--CBX3   | 4               | 2               | chr15:40561981           | chr7:26201745             | n.d.                    | No                          |                                                                                                                                                                                                           |
|               | TP53--ZNF398     | 4               | 1               | chr17:7687377            | chr7:149166158            | n.d.                    | No                          |                                                                                                                                                                                                           |
|               | EXT2--CRY2       | 3               | 0               | chr11:44171742           | chr11:45855982            | n.d.                    | NRF-ARF                     |                                                                                                                                                                                                           |
| 1-006         | TPM4--KLF2       | 11              | 0               | chr19:16076697           | chr19:16326856            | gel electrophoresis     | NRF-ARF                     | 46,X,add(X)(q2?1), add(1)(q4?3), add(3)(p21),add(20)(q11.2)                                                                                                                                               |
|               | C15orf57--CBX3   | 7               | 1               | chr15:40561981           | chr7:26201745             | gel electrophoresis     | No                          |                                                                                                                                                                                                           |
|               | B3GNTL1--METRNL  | 3               | 1               | chr17:83014454           | chr17:83084938            | n.d.                    | NRF-ARF                     |                                                                                                                                                                                                           |
|               | B3GNTL1--METRNL  | 1               | 1               | chr17:83035035           | chr17:83084938            | n.d.                    | NRF-ARF                     |                                                                                                                                                                                                           |
|               | B3GNTL1--METRNL  | 1               | 1               | chr17:83005115           | chr17:83093167            | n.d.                    | NRF-ARF                     |                                                                                                                                                                                                           |
| 1-007         | TPM4--KLF2       | 2               | 1               | chr19:16076697           | chr19:16326856            | n.d.                    | NRF-ARF                     | 46,XY,t(8;21)(q22;q22)                                                                                                                                                                                    |
| 1-008         | C15orf57--CBX3   | 11              | 4               | chr15:40561981           | chr7:26201745             | gel electrophoresis     | No                          | 46,XY,t(3;8)(q26;q24)                                                                                                                                                                                     |
|               | C15orf57--CBX3   | 4               | 4               | chr15:40562772           | chr7:26201769             | gel electrophoresis     | NRF-ARF                     |                                                                                                                                                                                                           |
| 2-002         | ZEB2--CXCR4      | 6               | 0               | chr2:144519939           | chr2:136115912            | gel electrophoresis     | No                          | 46,XY                                                                                                                                                                                                     |
|               | TPM4--KLF2       | 2               | 0               | chr19:16076697           | chr19:16326856            | Sanger                  | NRF-ARF                     |                                                                                                                                                                                                           |
| 2-003         | NSD1--NUP98      | 12              | 4               | chr5:177212195           | chr11:3735324             | gel electrophoresis     | NRF-NRF                     | 46,XY                                                                                                                                                                                                     |
|               | NUP98--NSD1      | 9               | 3               | chr11:3744509            | chr5:177235821            | gel electrophoresis     | NRF-NRF                     |                                                                                                                                                                                                           |
|               | NUP98--NSD1      | 2               | 3               | chr11:3753316            | chr5:177235821            | NGS                     | NRF-NRF                     |                                                                                                                                                                                                           |
|               | HIPK2--TBXAS1    | 2               | 0               | chr7:139777605           | chr7:139872235            | n.d.                    | NRF-ARF                     |                                                                                                                                                                                                           |
| 2-005         | BRI3BP--UBC      | 6               | 0               | chr12:124994003          | chr12:124913774           | n.d.                    | NRF-NRF                     | 46,XY,t(9;11)(p21;q23)                                                                                                                                                                                    |
| 2-007         | C15orf57--CBX3   | 3               | 2               | chr15:40561981           | chr7:26201745             | n.d.                    | No                          | 46,XY,inv(16)(p13q22)                                                                                                                                                                                     |
| 2-008         | NCOR2--UBC       | 3               | 2               | chr12:124419957          | chr12:124913774           | gel electrophoresis     | NRF-NRF                     | 47,XY,+11                                                                                                                                                                                                 |
|               | NCOR2--UBC       | 2               | 2               | chr12:124398119          | chr12:124913774           | n.d.                    | NRF-ARF                     |                                                                                                                                                                                                           |
|               | NCOR2--UBC       | 1               | 2               | chr12:124449815          | chr12:124913774           | n.d.                    | NRF-ARF                     |                                                                                                                                                                                                           |
|               | NCOR2--UBC       | 1               | 2               | chr12:124372022          | chr12:124913774           | n.d.                    | NRF-ARF                     |                                                                                                                                                                                                           |
|               | NCOR2--UBC       | 1               | 2               | chr12:124437930          | chr12:124913774           | n.d.                    | NRF-ARF                     |                                                                                                                                                                                                           |
|               | NCOR2--UBC       | 1               | 2               | chr12:124362126          | chr12:124913774           | n.d.                    | NRF-ARF                     |                                                                                                                                                                                                           |
|               | NCOR2--UBC       | 1               | 2               | chr12:124400501          | chr12:124913774           | gel electrophoresis     | NRF-ARF                     |                                                                                                                                                                                                           |
|               | NCOR2--UBC       | 1               | 2               | chr12:124535565          | chr12:124913774           | not detected            | No                          |                                                                                                                                                                                                           |
| 2-011         | MGAT1--GFPT2     | 31              | 11              | chr5:180808502           | chr5:180338600            | n.d.                    | No                          | 46,XX                                                                                                                                                                                                     |
|               | MGAT1--GFPT2     | 20              | 11              | chr5:180808648           | chr5:180338600            | n.d.                    | No                          |                                                                                                                                                                                                           |
|               | TPM4--KLF2       | 6               | 1               | chr19:16076697           | chr19:16326856            | n.d.                    | NRF-ARF                     |                                                                                                                                                                                                           |
| 2-012         | C15orf57--CBX3   | 6               | 1               | chr15:40561981           | chr7:26201745             | n.d.                    | No                          | 46,XX                                                                                                                                                                                                     |
|               | TPM4--KLF2       | 5               | 1               | chr19:16076697           | chr19:16326856            | n.d.                    | NRF-ARF                     |                                                                                                                                                                                                           |
| 2-013         | ZCCHC8--RSRC2    | 148             | 24              | chr12:122498827          | chr12:122505706           | n.d.                    | NRF-ARF                     | 46,XY                                                                                                                                                                                                     |
|               | C15orf57--CBX3   | 3               | 0               | chr15:40561981           | chr7:26201745             | n.d.                    | No                          |                                                                                                                                                                                                           |
| 2-019         | TAOK1--ATP5H     | 219             | 19              | chr17:29522519           | chr17:75042659            | n.d.                    | NRF-NRF                     | 45-46,XX,?inv(3)(p?q?),-4, add(5)(q1?2),der(9), t(4;9)(q21;q34),?dic(11;?)(p1?2;?), add(12)(p13), der(12)add(12)(p?)del(12)(q22), add(14)(q13),-17, del(17)(q21) +1-2mar[19]/46,XX[1]                     |
|               | SEC61A1--C3orf62 | 51              | 4               | chr3:128052902           | chr3:49274140             | n.d.                    | NRF-ARF                     |                                                                                                                                                                                                           |
|               | WDR82--GXylT2    | 34              | 8               | chr3:52278201            | chr3:72908367             | n.d.                    | NRF-NRF                     |                                                                                                                                                                                                           |
|               | FYCO1--EDEM1     | 33              | 3               | chr3:45984856            | chr3:5215829              | n.d.                    | NRF-ARF                     |                                                                                                                                                                                                           |
|               | WDR82--GXylT2    | 29              | 8               | chr3:52270712            | chr3:72908367             | n.d.                    | NRF-ARF                     |                                                                                                                                                                                                           |
|               | LARS2--PLCL2     | 11              | 3               | chr3:45400373            | chr3:17089733             | n.d.                    | NRF-NRF                     |                                                                                                                                                                                                           |
|               | YPEL2--TACO1     | 8               | 2               | chr17:59397488           | chr17:63604534            | n.d.                    | No                          |                                                                                                                                                                                                           |
| ZFYVE1--NFxL1 | 3                | 1               | chr14:73024026  | chr4:47879117            | n.d.                      | NRF-ARF                 |                             |                                                                                                                                                                                                           |



|               |                 |     |                |                 |                 |                     |         |                                                                                                                                                                              |
|---------------|-----------------|-----|----------------|-----------------|-----------------|---------------------|---------|------------------------------------------------------------------------------------------------------------------------------------------------------------------------------|
|               | MEPCE--TRIM56   | 3   | 2              | chr7:100433665  | chr7:101088891  | n.d.                | No      |                                                                                                                                                                              |
|               | NFXL1--ZFYVE1   | 3   | 0              | chr4:47884346   | chr14:72998315  | n.d.                | No      |                                                                                                                                                                              |
|               | ZFYVE1--NFXL1   | 1   | 1              | chr14:73024026  | chr4:47878665   | n.d.                | NRF-NRF |                                                                                                                                                                              |
| 2-020         | ETV6--LYN       | 582 | 72             | chr12:11869969  | chr8:55953832   | gel electrophoresis | NRF-NRF | 47,XX,+8,add(8)(q24),del(12)(p13),i(17)(q10)[cp14]                                                                                                                           |
| 2-021         | TPM4--KLF2      | 1   | 1              | chr19:16076697  | chr19:16326856  | n.d.                | NRF-ARF | 47,XY,+8                                                                                                                                                                     |
| 2-022         | LRG1--LYZ       | 3   | 2              | chr19:4537861   | chr12:69353759  | n.d.                | No      | 46,XX,der(11)t(11;11)(q13;q23)                                                                                                                                               |
|               | LRG1--LYZ       | 6   | 2              | chr19:4537864   | chr12:69353767  | n.d.                | No      | inv(11)(q13q23)t(11;19)(q23;p13),der(11)t(11;11)(q13;q23),del(12)(p13),der(19)t(11;19)(q23;p13)                                                                              |
|               | TPM4--KLF2      | 2   | 0              | chr19:16076697  | chr19:16326856  | gel electrophoresis | NRF-ARF |                                                                                                                                                                              |
| 2-024         | TPM4--KLF2      | 2   | 0              | chr19:16076697  | chr19:16326856  | gel electrophoresis | NRF-ARF | 46,XX                                                                                                                                                                        |
| 2-028         | TUBA1A--UBC     | 3   | 0              | chr12:49188977  | chr12:124913774 | n.d.                | NRF-NRF | 46,XY                                                                                                                                                                        |
| 2-031         | NUP98--NSD1     | 2   | 1              | chr11:3753316   | chr5:177235821  | NGS                 | NRF-NRF | 46,XY                                                                                                                                                                        |
|               | NUP98--NSD1     | 2   | 1              | chr11:3744509   | chr5:177235821  | gel electrophoresis | NRF-NRF |                                                                                                                                                                              |
| 2-032         | NUP98--NSD1     | 3   | 0              | chr11:3744509   | chr5:177235821  | NGS                 | NRF-NRF | 46,XY                                                                                                                                                                        |
|               | CLEC12A--CHMP1A | 2   | 1              | chr12:9982129   | chr16:89647331  | n.d.                | No      |                                                                                                                                                                              |
| 2-036         | NCOR2--UBC      | 2   | 0              | chr12:124535565 | chr12:124913774 | n.d.                | No      | 46,XX                                                                                                                                                                        |
|               | TPM4--KLF2      | 2   | 0              | chr19:16076697  | chr19:16326856  | n.d.                | NRF-ARF |                                                                                                                                                                              |
| 2-037         | TPM4--KLF2      | 3   | 0              | chr19:16076697  | chr19:16326856  | n.d.                | NRF-ARF | no metaphases                                                                                                                                                                |
| 2-038         | TPM4--KLF2      | 18  | 2              | chr19:16076697  | chr19:16326856  | gel electrophoresis | NRF-ARF | 47,XY,+10,der(16)t(16;21)del(16)(q12.1q24),der(21)t(16;21)(p11;q22).ish der(16)t(16;21)del(16)(q12.1q24)(3'CBFB-,5'CBFB-,TUBB3+),der(21)t(16;21)(p11;q22)(3'MYH11+,5'MYH11+) |
| 2-043         | ATP6V0D1--TERF2 | 70  | 6              | chr16:67480957  | chr16:69361489  | n.d.                | NRF-ARF | 47,XX,del(7)(q31q36),+8,inv(16)(p13q22)                                                                                                                                      |
|               | CTCF--ABCC1     | 11  | 3              | chr16:67571264  | chr16:16009776  | n.d.                | No      |                                                                                                                                                                              |
|               | CTCF--ABCC1     | 2   | 3              | chr16:67571264  | chr16:16014491  | n.d.                | No      |                                                                                                                                                                              |
| 2-047         | TPM4--KLF2      | 15  | 2              | chr19:16076697  | chr19:16326856  | n.d.                | NRF-ARF | 46,XX,t(6;11)(q27;q23)                                                                                                                                                       |
| 2-048         | TPM4--KLF2      | 7   | 0              | chr19:16076697  | chr19:16326856  | n.d.                | NRF-ARF | 46,XY                                                                                                                                                                        |
| 2-052         | C15orf57--CBX3  | 6   | 0              | chr15:40561981  | chr7:26201745   | n.d.                | No      | 46,XY,t(6;9)(p22;q34)                                                                                                                                                        |
| 2-053         | TPM4--KLF2      | 13  | 2              | chr19:16076697  | chr19:16326856  | n.d.                | NRF-ARF | 46,XY,inv(16)(p13q22)                                                                                                                                                        |
|               | C15orf57--CBX3  | 10  | 1              | chr15:40561981  | chr7:26201745   | n.d.                | No      |                                                                                                                                                                              |
|               | PIM3--SCO2      | 2   | 0              | chr22:49961811  | chr22:50524424  | gel electrophoresis | NRF-ARF |                                                                                                                                                                              |
| 3-002         | TPM4--KLF2      | 5   | 0              | chr19:16076697  | chr19:16326856  | n.d.                | NRF-ARF | 45,X,t(8;21)(q22;q22)                                                                                                                                                        |
| 3-006         | TPM4--KLF2      | 3   | 1              | chr19:16076697  | chr19:16326856  | n.d.                | NRF-ARF | 47,XY,+Xc                                                                                                                                                                    |
| 3-008         | TPM4--KLF2      | 2   | 0              | chr19:16076697  | chr19:16326856  | n.d.                | NRF-ARF | 46,XX,t(9;11)(p21;q23)                                                                                                                                                       |
| 3-011         | C15orf57--CBX3  | 3   | 0              | chr15:40561981  | chr7:26201745   | n.d.                | No      | 46,XY                                                                                                                                                                        |
|               | MAPKAP1--PBX3   | 2   | 0              | chr9:125543059  | chr9:125797395  | n.d.                | NRF-ARF |                                                                                                                                                                              |
| 3-012         | TPM4--KLF2      | 4   | 0              | chr19:16076697  | chr19:16326856  | gel electrophoresis | NRF-ARF | 46,XY                                                                                                                                                                        |
|               | C15orf57--CBX3  | 3   | 1              | chr15:40561981  | chr7:26201745   | gel electrophoresis | No      |                                                                                                                                                                              |
| 3-013         | TMEM44--LSG1    | 6   | 1              | chr3:194623224  | chr3:194644746  | n.d.                | NRF-NRF | 46,XX                                                                                                                                                                        |
| 3-016         | RASA3--ING1     | 3   | 1              | chr13:114132435 | chr13:110719229 | n.d.                | NRF-NRF | 48,XY,+8,+11[6]/49,idem,+21[4]                                                                                                                                               |
|               | CYTH1--USP36    | 3   | 0              | chr17:78782202  | chr17:78838750  | n.d.                | NRF-ARF |                                                                                                                                                                              |
|               | FUS--SETD1A     | 2   | 0              | chr16:31180227  | chr16:30958717  | n.d.                | NRF-ARF |                                                                                                                                                                              |
|               | PIM3--TRABD     | 5   | 0              | chr22:49961811  | chr22:50197241  | n.d.                | NRF-ARF |                                                                                                                                                                              |
|               | NFATC1--CTDP1   | 1   | 2              | chr18:79451816  | chr18:79695225  | n.d.                | NRF-ARF |                                                                                                                                                                              |
|               | NFATC1--CTDP1   | 1   | 2              | chr18:79433738  | chr18:79753652  | n.d.                | NRF-ARF |                                                                                                                                                                              |
|               | FBRSL1--NOC4L   | 1   | 2              | chr12:132560230 | chr12:132150981 | n.d.                | No      |                                                                                                                                                                              |
|               | BSG--TMEM259    | 1   | 1              | chr19:571579    | chr19:1014473   | n.d.                | NRF-ARF |                                                                                                                                                                              |
|               | BSG--TMEM259    | 1   | 1              | chr19:572701    | chr19:1014473   | n.d.                | NRF-ARF |                                                                                                                                                                              |
|               | NFATC1--CTDP1   | 1   | 2              | chr18:79467582  | chr18:79695225  | n.d.                | NRF-ARF |                                                                                                                                                                              |
|               | NFATC1--CTDP1   | 1   | 2              | chr18:79486630  | chr18:79736355  | n.d.                | NRF-NRF |                                                                                                                                                                              |
|               | NFATC1--CTDP1   | 1   | 2              | chr18:79396351  | chr18:79695225  | n.d.                | NRF-ARF |                                                                                                                                                                              |
|               | NFATC1--CTDP1   | 1   | 2              | chr18:79400479  | chr18:79695225  | n.d.                | NRF-ARF |                                                                                                                                                                              |
| NFATC1--CTDP1 | 1               | 2   | chr18:79400479 | chr18:79753652  | n.d.            | NRF-ARF             |         |                                                                                                                                                                              |
| 3-017         | TPM4--KLF2      | 5   | 0              | chr19:16076697  | chr19:16326856  | n.d.                | NRF-ARF | 46,XX                                                                                                                                                                        |
| 3-018         | CTCF--NUTF2     | 26  | 1              | chr16:67571264  | chr16:67865102  | n.d.                | No      |                                                                                                                                                                              |

|       |                  |    |   |                 |                 |                     |         |                                               |
|-------|------------------|----|---|-----------------|-----------------|---------------------|---------|-----------------------------------------------|
|       | C15orf57--CBX3   | 1  | 2 | chr15:40562772  | chr7:26201757   | NGS                 | No      | 46,XY                                         |
|       | C15orf57--CBX3   | 10 | 0 | chr15:40561981  | chr7:26201745   | NGS                 | No      |                                               |
|       | ZFPM1--GSE1      | 1  | 1 | chr16:88489153  | chr16:85654278  | n.d.                | NRF-ARF |                                               |
| 3-019 | C15orf57--CBX3   | 10 | 0 | chr15:40561981  | chr7:26201745   | n.d.                | No      | 46,XX                                         |
|       | TPM4--KLF2       | 3  | 1 | chr19:16076697  | chr19:16326856  | n.d.                | NRF-ARF |                                               |
| 3-020 | TPM4--KLF2       | 5  | 1 | chr19:16076697  | chr19:16326856  | n.d.                | NRF-ARF | 47,XX,+8                                      |
|       | C15orf57--CBX3   | 4  | 2 | chr15:40561981  | chr7:26201745   | n.d.                | No      |                                               |
|       | SRGN--IRF2BP2    | 4  | 0 | chr10:69088236  | chr1:234607852  | n.d.                | NRF-NRF |                                               |
| 3-021 | B3GNT5--KLHL24   | 2  | 0 | chr3:183253472  | chr3:183643480  | n.d.                | No      | 46,XX                                         |
|       | TPM4--KLF2       | 8  | 0 | chr19:16076697  | chr19:16326856  | n.d.                | NRF-ARF |                                               |
|       | PIM3--SCO2       | 3  | 1 | chr22:49961811  | chr22:50524424  | Sanger              | NRF-ARF |                                               |
|       | OAZ1--KLF2       | 3  | 0 | chr19:2269744   | chr19:16326856  | n.d.                | No      |                                               |
| 3-022 | GUK1--ARF1       | 2  | 0 | chr1:228140363  | chr1:228097078  | n.d.                | NRF-ARF | 45,XX,der(3)t(1;3)(q3?1;q2?5),-7              |
|       | TPM4--KLF2       | 9  | 0 | chr19:16076697  | chr19:16326856  | n.d.                | NRF-ARF |                                               |
| 3-023 | NCOR2--UBC       | 2  | 0 | chr12:124419957 | chr12:124913774 | n.d.                | NRF-NRF | 46,XY,t(1;10)                                 |
|       | OAZ1--ZBTB7A     | 3  | 0 | chr19:2269744   | chr19:4055247   | n.d.                | NRF-ARF |                                               |
| 3-024 | NFATC1--CTDP1    | 1  | 1 | chr18:79467582  | chr18:79753652  | n.d.                | NRF-ARF | 45,X-Y                                        |
|       | PIM3--SCO2       | 17 | 3 | chr22:49961811  | chr22:50524424  | Sanger              | NRF-ARF |                                               |
|       | YWHAZ--KLF10     | 4  | 1 | chr8:100951929  | chr8:102652397  | not detected        | No      |                                               |
|       | DHX9--GLUL       | 2  | 1 | chr1:182839456  | chr1:182388750  | n.d.                | No      |                                               |
| 3-025 | FUS--SETD1A      | 2  | 0 | chr16:31180227  | chr16:30958717  | n.d.                | No      | 46,XY,t(9;11;17)(q22;q13;p13),inv(16)(p13q22) |
|       | TPM4--KLF2       | 10 | 1 | chr19:16076697  | chr19:16326856  | n.d.                | NRF-ARF |                                               |
| 3-029 | OAZ1--KLF2       | 2  | 1 | chr19:2269744   | chr19:16326856  | n.d.                | No      | 46,XX,inv(3)(q21q26)                          |
|       | C15orf57--CBX3   | 3  | 1 | chr15:40561981  | chr7:26201745   | NGS                 | No      |                                               |
| 3-030 | C15orf57--CBX3   | 3  | 1 | chr15:40562772  | chr7:26201769   | NGS                 | NRF-ARF | 48 XY,+8,+15                                  |
| 3-032 | CCDC88C--ITPK1   | 2  | 0 | chr14:91408659  | chr14:93016801  | n.d.                | NRF-NRF | 47,XX,+8,add(5)(p15)                          |
|       | NCOR2--UBC       | 2  | 0 | chr12:124400501 | chr12:124913774 | n.d.                | NRF-ARF |                                               |
|       | NCOR2--UBC       | 2  | 0 | chr12:124362126 | chr12:124913774 | n.d.                | NRF-ARF |                                               |
| 3-033 | ZEB2--CXCR4      | 2  | 0 | chr2:144519939  | chr2:136115912  | gel electrophoresis | No      | 45,X,-X                                       |
| 3-034 | FAM49B--KIAA0196 | 9  | 0 | chr8:129903312  | chr8:125084022  | n.d.                | No      | 46,XY                                         |
| 3-035 | MAPKAPK5--ACAD10 | 24 | 3 | chr12:111871180 | chr12:111744643 | n.d.                | NRF-ARF | 46,XY                                         |
| 3-038 | TPM4--KLF2       | 5  | 0 | chr19:16076697  | chr19:16326856  | n.d.                | NRF-ARF | 48,XX,-7,+10,+19,+21                          |
|       | C15orf57--CBX3   | 3  | 1 | chr15:40561981  | chr7:26201745   | n.d.                | No      |                                               |
|       | NCOR2--UBC       | 2  | 1 | chr12:124437930 | chr12:124913774 | n.d.                | NRF-ARF |                                               |
| 3-039 | NCOR2--UBC       | 2  | 1 | chr12:124466173 | chr12:124913774 | n.d.                | NRF-NRF | 46,XY,add(7)(q?),inv(16)(p13q22)              |
|       | TPM4--KLF2       | 9  | 0 | chr19:16076697  | chr19:16326856  | Sanger              | NRF-ARF |                                               |
| 3-040 | TPM4--KLF2       | 2  | 1 | chr19:16076697  | chr19:16326856  | n.d.                | NRF-ARF | 46,XY                                         |
|       | NCOR2--UBC       | 2  | 0 | chr12:124400501 | chr12:124913774 | n.d.                | NRF-ARF |                                               |

<sup>1</sup> JR; junction reads; single reads containing sequences of two different genes.

<sup>2</sup> SF; spanning fragments; read pairs containing sequences of two different genes.

<sup>3</sup> Left GRCh38; position of the 3' end of the upstream partner gene in the fusion transcript after alignment to the GRCh38 genome.

<sup>4</sup> Right GRCh38; position of the 5' end of the downstream partner gene in the fusion transcript after alignment to the GRCh38 genome.

<sup>5</sup> Fusion transcripts were validated by RT-PCR and fragment size analysis by gel electrophoresis and in some instances by Sanger or NGS. Primers used for validation are shown in Table SV. n.d.; not determined.

<sup>6</sup> Indicated whether the downstream partner gene in the fusion transcript is translated in the normal reading frame (NRF) or alternative reading frame (ARF).

<sup>7</sup> No fusion protein due to absence of a coding sequence or presence of a stop codon in the upstream partner of the transcript.

**Table SVI. Primers used for validation of fusion transcripts.**

| Primer      | Sequence (5'- 3')      | ENST transcript | Position    |            | Size (bp)         |
|-------------|------------------------|-----------------|-------------|------------|-------------------|
|             |                        |                 | start (cds) | stop (cds) |                   |
| RUNX1-1F    | CTTCACAAACCCACCGCAAG   | ENST00000344691 | 456         | 475        | 162 & 326         |
| RUNX1T1-1R  | GGTGGCATTGTTGGAGGAGT   | ENST00000520724 | 206         | 187        |                   |
| KMT2A-1F    | CAGCACTCTCTCCAATGGCA   | ENST00000534358 | 4140        | 4159       | 143 & 257         |
| MLLT3-1R    | TCTGGGATGGTGTGAAGCTG   | ENST00000380338 | 1189        | 1170       |                   |
| KMT2A-1F    | CAGCACTCTCTCCAATGGCA   | ENST00000534358 | 4140        | 4159       | 338 & 452         |
| MLLT3-2R    | TGTTGTGATCCCTGGAAGGTT  | ENST00000380338 | 679         | 659        |                   |
| KMT2A-1F    | CAGCACTCTCTCCAATGGCA   | ENST00000534358 | 4140        | 4159       | 134               |
| MLLT1-1R    | GCTTCTTGCGCAGTTGGG     | ENST00000252674 | 67          | 50         |                   |
| KMT2A-2F    | AAGCCCGTCGAGGAAAAGAG   | ENST00000534358 | 3793        | 3812       | 359               |
| MLLT4-1R    | GTTGCAAAGTTTCCAGCAGCT  | XM_005266996    | 165         | 150        |                   |
| KMT2A-2F    | AAGCCCGTCGAGGAAAAGAG   | ENST00000534358 | 3793        | 3812       | 279               |
| MLLT6-1R    | TGTGGGAGATGGGGTCTTAT   | ENST00000621332 | 1687        | 1667       |                   |
| CBFB-1F     | TGAAGAGGCTCGGAGAAGGA   | ENST00000290858 | 429         | 449        | 139               |
| MYH11-1R    | CTCTCCAGCTGCGTCTTCA    | ENST00000396324 | 4671        | 4652       |                   |
| CBFB-1F     | TGAAGAGGCTCGGAGAAGGA   | ENST00000290858 | 429         | 449        | 127               |
| MYH11-2R    | CAGCTTAATGGCCTTCCCCT   | ENST00000396324 | 3939        | 3920       |                   |
| CBFB-1F     | TGAAGAGGCTCGGAGAAGGA   | ENST00000290858 | 429         | 449        | 228 & 259         |
| MYH11-3R    | CCATCGCTGCACTTGGACT    | ENST00000396324 | 3833        | 3815       |                   |
| ERG-1F      | CTGAAGACCAGCGTCCTCAG   | ENST00000398919 | 869         | 888        | 163               |
| FUS-1R      | ACATTCTCACCCAGGCCTTG   | ENST00000254108 | 887         | 868        |                   |
| FUS-1F      | AGCAGTGGTGGCTATGAACC   | ENST00000254108 | 703         | 722        | 199               |
| ERG-1R      | TCTTGAACTCCCCGTTGGTG   | ENST00000398919 | 1042        | 1023       |                   |
| PML-1F      | GGTGCAGAGGATGAAGTGCT   | ENST00000268058 | 996         | 1016       | 319 & 390         |
| RARA-1R     | GCTGACCCCATAGTGGTAGC   | ENST00000254066 | 309         | 290        |                   |
| PML-2F      | GGTGCAGAGGATGAAGTGCT   | ENST00000268058 | 1056        | 1075       | 676               |
| RARA-2R     | CTGGGCAGGGAGAGAAGTTG   | ENST00000254066 | 178+2991    | 178+2972   |                   |
| RARA-1F     | CCCTACGCCTTCTTCTTCCC   | ENST00000254066 | 67          | 86         | 175               |
| PML-1R      | CGTCAATAGGGTCCCTGGGA   | ENST00000268058 | 1246        | 1227       |                   |
| RARA-1F     | CCCTACGCCTTCTTCTTCCC   | ENST00000254066 | 67          | 86         | 201               |
| PML-2R      | GGACTCACTGCTGCTGTCAT   | ENST00000268058 | 1746        | 1727       |                   |
| DEK-1F      | AGTTGAAGAAACCCCTACAGA  | ENST00000397239 | 944         | 965        | 189               |
| NUP214-1R   | CCAGATGCTGATCCCACTCC   | ENST00000359428 | 2521        | 2502       |                   |
| NUP214-1F   | TTGAGGGCTTTGCTGGTGT    | ENST00000359428 | 2397        | 2416       | 231               |
| DEK-1R      | TGGGAACGAGTCATCTTCTCTG | ENST00000397239 | 1027 *31    | 1027 *10   |                   |
| NSD1-1F     | GCTTAGATTCAGCTGGGCCA   | ENST00000439151 | 3677        | 3696       | 227               |
| NUP98-1R    | CGGATTCCGGAAGAGAGGAG   | ENST00000355260 | 1515        | 1496       |                   |
| NUP98-1F    | TGGCACAAATACCACTGGGA   | ENST00000355260 | 1179        | 1198       | 209 & 350         |
| NSD1-1R     | GCACCTGCTCCTGTACCTTC   | ENST00000439151 | 3916        | 3897       |                   |
| TPM4-1F     | GTGAAACGCAAGATCCAGGC   | ENST00000300933 | 28          | 47         | 277               |
| KLF2-1R     | ATGTGCCGTTTCATGTGCAG   | ENST00000248071 | 1064        | 1045       |                   |
| C15ORF57-1F | CTGAAGGTGAAGGCCAGAGG   | NM_001080791    | 170         | 189        | 221, 269,<br>1024 |
| CBX3-1R     | TGTAGTTTTGTTGGAGGCCA   | ENST00000337620 | 21          | 2          |                   |
| NCOR2-1F    | CACCGCCACTTGCCTGAG     | ENST00000458234 | -240        | -223       | 220 & 267         |
| UBC-1R      | TCCAGCAAAGATCAGCCTCTG  | ENST00000536769 | 141         | 121        |                   |
| NCOR2-2F    | GGCTGAGTGCCTCCTATT     | ENST00000458234 | 1389        | 1408       | 238 & 569         |
| UBC-1R      | TCCAGCAAAGATCAGCCTCTG  | ENST00000536769 | 141         | 121        |                   |
| ZEB2-1F     | CGCGGCTTCTTCATGCTTTT   | ENST00000627532 | -133        | -114       | 142               |
| CXCR4-1R    | TTCACGGAAACAGGGTTCTT   | ENST00000241393 | 94          | 74         |                   |
| ETV6-1F     | GGGAAGCCCATCAACCTCTC   | ENST00000396373 | 901         | 920        | 181               |
| LYN-1R      | TATCCCATGGCTTCTGTGGC   | ENST00000519728 | 709         | 690        |                   |
| PIM3-1F     | ACCGCGACATTAAGGACGAA   | ENST00000360612 | 503         | 522        | 239               |
| SCO2-1R     | AAAGCCAGGACCTCAGATGC   | ENST00000252785 | 112         | 93         |                   |

<sup>1</sup> PCR was performed for 33 cycles using PWO SuperYield DNA polymerase or Phusion Flash High-Fidelity PCR Master Mix.

**Table SVII. Detection of small variants in 13 genes that are recurrently mutated in AML.**

| AML   | Gene   | Chrom | GRCh38 <sup>1</sup> | Exon <sup>2</sup> | HGVS <sup>3</sup>              | HGVSp <sup>4</sup>                    | HS <sup>5</sup> | Cos <sup>6</sup> | SNP <sup>7</sup> | Class <sup>8</sup> | Jaiswal <sup>9</sup> | Existing Variation <sup>10</sup>                                                                                                                     | DP <sup>11</sup> | RD <sup>12</sup> | AD <sup>13</sup> | VAF <sup>14</sup> | SIFT <sup>15</sup> | PolyPhen <sup>16</sup>   | Validation <sup>17</sup> |
|-------|--------|-------|---------------------|-------------------|--------------------------------|---------------------------------------|-----------------|------------------|------------------|--------------------|----------------------|------------------------------------------------------------------------------------------------------------------------------------------------------|------------------|------------------|------------------|-------------------|--------------------|--------------------------|--------------------------|
| 1-001 | NRAS   | chr1  | 114716123           | 2/7               | ENST00000369535.4:c.38G>A      | ENSP00000358548.4:p.Gly13Asp          | yes             | yes              | no               | A                  | yes                  | NRASbase_D0125:g.40791G>A,CM071907,COSM574,COSM575,COSM573                                                                                           | 122              | 96               | 21               | 0.18              | deleterious(0.05)  | benign(0.004)            | NGS                      |
| 1-002 | DNMT3A | chr2  | 25234373            | 23/23             | ENST00000321117.7:c.2645G>A    | ENSP00000324375.5:p.Arg882His         | yes             | yes              | yes              | A                  | yes                  | rs147001633,COSM442676,COSM3356083,COSM1583129,COSM99740,COSM52944                                                                                   | 82               | 33               | 48               | 0.59              | deleterious(0.03)  | Probably damaging(0.993) | Sanger                   |
|       | FLT3   | chr13 | 28018505            | 20/24             | ENST00000241453.9:c.2503G>C    | ENSP00000241453.7:p.Asp835His         | yes             | yes              | no               | A                  | yes                  | KinMutBase_FLT3_DNA:g.53109G>T,KinMutBase_FLT3_DNA:g.53109G>C,KinMutBase_FLT3_DNA:g.53109G>A,KinMutBase_FLT3_DNA:g.53109delG,COSM783,COSM789,COSM785 | 919              | 742              | 146              | 0.16              | deleterious(0)     | Probably damaging(1)     | Sanger                   |
|       | FLT3   | chr13 | 28052579            | 5/24              | ENST00000241453.9:c.580G>A     | ENSP00000241453.7:p.Val194Met         | no              | yes              | yes              | B                  | no                   | rs146030737,COSM28039                                                                                                                                | 675              | 336              | 323              | 0.49              | tolerated(0.05)    | benign(0.15)             | Sanger                   |
|       | IDH1   | chr2  | 208243577           | 6/10              | ENST00000345146.4:c.548A>G     | ENSP00000260985.2:p.Tyr183Cys         | no              | no               | yes              | D                  | no                   | rs34599179,CM073129                                                                                                                                  | 629              | 322              | 304              | 0.49              | deleterious(0)     | Probably damaging(0.994) | Sanger                   |
|       | TET2   | chr4  | 105236781           | 3/11              | ENST00000380013.6:c.2839C>T    | ENSP00000369351.4:p.Gln947Ter         | no              | yes              | no               | B                  | yes                  | COSM1318625,COSM1318626                                                                                                                              | 111              | 88               | 13               | 0.13              | NA                 | NA                       | NGS                      |
|       | TET2   | chr4  | 105276128           | 11/11             | ENST00000380013.6:c.5618T>C    | ENSP00000369351.4:p.Ile1873Thr        | no              | yes              | yes              | B                  | yes                  | rs116519313,COSM41741                                                                                                                                | 165              | 34               | 129              | 0.79              | deleterious(0)     | Probably damaging(1)     | NGS                      |
| 1-003 | NPM1   | chr5  | 171410539           | 12/12             | ENST00000517671.3:c.860_863dup | ENSP00000428755.1:p.Trp288CysfsTer12  | yes             | yes              | no               | A                  | yes                  | COSM1319222,COSM255167,COSM46518,COSM158604                                                                                                          | 849              | 554              | 292              | 0.34              | NA                 | NA                       | Sanger                   |
|       | DNMT3A | chr2  | 25234374            | 23/23             | ENST00000321117.7:c.2644C>T    | ENSP00000324375.5:p.Arg882Cys         | yes             | yes              | yes              | A                  | yes                  | rs377577594,COSM1166704,COSM1583136,COSM53042,COSM87001                                                                                              | 241              | 131              | 107              | 0.45              | deleterious(0)     | Probably damaging(0.997) | Sanger                   |
|       | TET2   | chr4  | 105261793           | 8/11              | ENST00000380013.6:c.3989C>A    | ENSP00000369351.4:p.Ser1330Tyr        | no              | no               | no               | C                  | yes                  | NA                                                                                                                                                   | 115              | 0                | 114              | 0.99              | deleterious(0)     | Probably damaging(0.987) | Sanger                   |
| 1-004 | KIT    | chr4  | 54733155            | 17/21             | ENST00000288135.5:c.2447A>T    | ENSP00000288135.5:p.Asp816Val         | yes             | yes              | yes              | A                  | yes                  | rs121913507,KinMutBase_KIT_DNA:g.76140A>T,CM952169,COSM1314,COSM24675,COSM12711                                                                      | 460              | 289              | 170              | 0.37              | deleterious(0)     | Probably damaging(0.977) | Sanger                   |
|       | IDH2   | chr15 | 90084321            | 11/11             | ENST00000330062.5:c.1304C>T    | ENSP00000331897.3:p.Thr435Met         | no              | no               | yes              | D                  | no                   | rs118053940                                                                                                                                          | 533              | 287              | 242              | 0.46              | tolerated(0.14)    | benign(0.153)            | Sanger                   |
| 1-006 | DNMT3A | chr2  | 25234373            | 23/23             | ENST00000321117.7:c.2645G>A    | ENSP00000324375.5:p.Arg882His         | yes             | yes              | yes              | A                  | yes                  | rs147001633,COSM442676,COSM3356083,COSM1583129,COSM99740,COSM52944                                                                                   | 198              | 115              | 78               | 0.40              | deleterious(0.03)  | Probably damaging(0.993) | Sanger                   |
|       | KIT    | chr4  | 54695617            | 2/21              | ENST00000288135.5:c.173G>T     | ENSP00000288135.5:p.Cys58Phe          | no              | no               | no               | C                  | no                   | NA                                                                                                                                                   | 307              | 261              | 46               | 0.15              | deleterious(0)     | Probably damaging(1)     | NGS                      |
|       | KIT    | chr4  | 54733155            | 17/21             | ENST00000288135.5:c.2447A>T    | ENSP00000288135.5:p.Asp816Val         | yes             | yes              | yes              | A                  | yes                  | rs121913507,KinMutBase_KIT_DNA:g.76140A>T,CM952169,COSM1314,COSM24675,COSM12711                                                                      | 384              | 194              | 189              | 0.49              | deleterious(0)     | Probably damaging(0.977) | Sanger                   |
|       | RUNX1  | chr21 | 34792416            | 8/8               | ENST00000300305.5:c.1161del    | ENSP00000300305.3:p.Ser388ArgfsTer206 | no              | no               | yes              | D                  | yes                  | rs1055306                                                                                                                                            | 369              | 203              | 163              | 0.45              | NA                 | NA                       | Sanger                   |
|       | RUNX1  | chr21 | 34887027            | 3/8               | ENST00000300305.5:c.167T>C     | ENSP00000300305.3:p.Leu56Ser          | no              | yes              | yes              | B                  | no                   | rs111527738,COSM24756                                                                                                                                | 334              | 167              | 160              | 0.49              | tolerated(0.66)    | Possibly damaging(0.812) | Sanger                   |
|       | ASXL1  | chr20 | 32434638            | 13/13             | ENST00000375687.6:c.1934dup    | ENSP00000364839.4:p.Gly646TrpfsTer12  | yes             | yes              | no               | A                  | yes                  | COSM1411076                                                                                                                                          | 70               | 52               | 20               | 0.28              | NA                 | NA                       | Sanger                   |
| 2-001 | DNMT3A | chr2  | 25234374            | 23/23             | ENST00000321117.7:c.2644C>T    | ENSP00000324375.5:p.Arg882Cys         | yes             | yes              | yes              | A                  | yes                  | rs377577594,COSM1166704,COSM1583136,COSM53042,COSM87001                                                                                              | 72               | 39               | 33               | 0.46              | deleterious(0)     | Probably damaging(0.997) | Sanger                   |
|       | NPM1   | chr5  | 171410539           | 12/12             | ENST00000517671.3:c.860_863dup | ENSP00000428755.1:p.Trp288CysfsTer12  | yes             | yes              | no               | A                  | yes                  | COSM1319222,COSM255167,COSM46518,COSM158604                                                                                                          | 512              | 347              | 164              | 0.32              | NA                 | NA                       | Sanger                   |
| 2-002 | DNMT3A | chr2  | 25244579            | 14/23             | ENST00000321117.7:c.1628G>T    | ENSP00000324375.5:p.Gly543Val         | no              | yes              | no               | B                  | no                   | COSM249135,COSM1583073,COSM256033                                                                                                                    | 73               | 39               | 34               | 0.47              | deleterious(0)     | Probably damaging(0.999) | Sanger                   |
|       | RUNX1  | chr21 | 34834566            | 6/8               | ENST00000300305.5:c.649G>A     | ENSP00000300305.3:p.Gly217Arg         | no              | no               | no               | C                  | no                   | NA                                                                                                                                                   | 521              | 224              | 197              | 0.47              | deleterious(0.01)  | Probably damaging(0.948) | Sanger                   |
|       | TET2   | chr4  | 105235712           | 3/11              | ENST00000380013.6:c.1771del    | ENSP00000369351.4:p.Gln591SerfsTer10  | no              | no               | no               | C                  | yes                  | NA                                                                                                                                                   | 132              | 66               | 56               | 0.46              | NA                 | NA                       | Sanger                   |
|       | TET2   | chr4  | 105272773           | 10/11             | ENST00000380013.6:c.4392C>A    | ENSP00000369351.4:p.Cys1464Ter        | no              | yes              | no               | B                  | yes                  | COSM211624                                                                                                                                           | 122              | 58               | 61               | 0.51              | NA                 | NA                       | Sanger                   |
| 2-003 | FLT3   | chr13 | 28018505            | 20/24             | ENST00000241453.9:c.2503G>C    | ENSP00000241453.7:p.Asp835His         | yes             | yes              | no               | A                  | yes                  | KinMutBase_FLT3_DNA:g.53109G>T,KinMutBase_FLT3_DNA:g.53109G>C,KinMutBase_FLT3_DNA:g.53109G>A,KinMutBase_FLT3_DNA:g.53109delG,COSM783,COSM789,COSM785 | 622              | 292              | 312              | 0.52              | deleterious(0)     | Probably damaging(1)     | Sanger                   |
|       | FLT3   | chr13 | 28049450            | 8/24              | ENST00000241453.9:c.970G>A     | ENSP00000241453.7:p.Asp324Asn         | no              | yes              | yes              | B                  | no                   | rs35602083,CM066823,COSM28040                                                                                                                        | 524              | 259              | 263              | 0.50              | tolerated(0.33)    | benign(0.035)            | Sanger                   |
| 2-004 | KIT    | chr4  | 54733154            | 17/21             | ENST00000288135.5:c.2446G>T    | ENSP00000288135.5:p.Asp816Tyr         | yes             | yes              | yes              | A                  | yes                  | rs121913506,KinMutBase_KIT_DNA:g.76139G>C,KinMutBase_KIT_DNA:g.76139G>T,COSM1313,COSM1311,COSM1310                                                   | 419              | 251              | 166              | 0.40              | deleterious(0)     | Probably damaging(0.963) | Sanger                   |
|       | RUNX1  | chr21 | 34887027            | 3/8               | ENST00000300305.5:c.167T>C     | ENSP00000300305.3:p.Leu56Ser          | no              | yes              | yes              | B                  | no                   | rs111527738,COSM24756                                                                                                                                | 552              | 286              | 260              | 0.48              | tolerated(0.66)    | Possibly damaging(0.812) | Sanger                   |
|       | ASXL1  | chr20 | 32436457            | 13/13             | ENST00000375687.6:c.3745A>G    | ENSP00000364839.4:p.Met1249Val        | yes             | no               | yes              | D                  | no                   | rs146141075                                                                                                                                          | 162              | 89               | 72               | 0.45              | tolerated(0.48)    | benign(0)                | Sanger                   |

|       |        |       |           |       |                                    |                                       |     |     |     |   |     |                                                                                                                                                      |      |      |     |      |                   |                          |        |
|-------|--------|-------|-----------|-------|------------------------------------|---------------------------------------|-----|-----|-----|---|-----|------------------------------------------------------------------------------------------------------------------------------------------------------|------|------|-----|------|-------------------|--------------------------|--------|
|       | WT1    | chr11 | 32396363  | 7/10  | ENST00000332351.5:c.1133_1142dup   | ENSP00000331327.3:p.Ala382CysfsTer6   | no  | yes | no  | B | yes | COSM27304,COSM41869,COSM29406,COSM28968,COSM28954,COSM27303,COSM28947,COSM41854,COSM28955                                                            | 39   | 33   | 5   | 0.13 | NA                | NA                       | NGS    |
| 2-005 | IDH2   | chr15 | 90087472  | 6/11  | ENST00000330062.5:c.782G>A         | ENSP00000331897.3:p.Arg261His         | no  | no  | yes | C | no  | rs118101777                                                                                                                                          | 1141 | 571  | 565 | 0.50 | deleterious(0)    | Probably damaging(0.98)  | Sanger |
| 2-006 | FLT3   | chr13 | 28034118  | 14/24 | ENST00000241453.9:c.1780_1800dup   | ENSP00000241453.7:p.Phe594_Asp600dup  | yes | yes | no  | A | no  | COSM1317919,COSM27907,COSM19953,COSM20768,COSM840,COSM19858                                                                                          | 888  | 672  | 138 | 0.16 | NA                | NA                       | Sanger |
|       | TET2   | chr4  | 105237193 | 3/11  | ENST00000380013.6:c.3251A>C        | ENSP00000369351.4:p.Gln1084Pro        | no  | no  | yes | D | no  | rs75056899                                                                                                                                           | 62   | 42   | 19  | 0.31 | tolerated(0.06)   | benign(0.01)             | Sanger |
| 2-007 | KIT    | chr4  | 54726036  | 9/21  | ENST00000288135.5:c.1526A>T        | ENSP00000288135.5:p.Lys509Ile         | no  | yes | no  | B | no  | CM061829,COSM96885,COSM1430134                                                                                                                       | 452  | 234  | 209 | 0.47 | deleterious(0.03) | Probably damaging(0.994) | Sanger |
|       | TET2   | chr4  | 105259708 | 7/11  | ENST00000380013.6:c.3893G>A        | ENSP00000369351.4:p.Cys1298Tyr        | no  | yes | no  | B | yes | COSM43474,COSM87138                                                                                                                                  | 36   | 19   | 17  | 0.47 | deleterious(0)    | Probably damaging(0.995) | Sanger |
|       | CEBPA  | chr19 | 33301447  | 1/1   | ENST00000498907.2:c.968G>T         | ENSP00000427514.1:p.Arg323Leu         | no  | yes | no  | B | no  | COSM3707035                                                                                                                                          | 603  | 303  | 297 | 0.50 | deleterious(0)    | Possibly damaging(0.794) | Sanger |
| 2-008 | FLT3   | chr13 | 28018503  | 20/24 | ENST00000241453.9:c.2505T>G        | ENSP00000241453.7:p.Asp835Glu         | yes | yes | yes | A | yes | rs121913487,KinMutBase_FLT3_DNA:g.53111T>A,KinMutBase_FLT3_DNA:g.53111T>G,COSM788,COSM787                                                            | 1058 | 467  | 573 | 0.55 | deleterious(0)    | Probably damaging(0.997) | Sanger |
|       | IDH1   | chr2  | 208243577 | 6/10  | ENST00000345146.4:c.548A>G         | ENSP00000260985.2:p.Tyr183Cys         | no  | no  | yes | D | no  | rs34599179,CM073129                                                                                                                                  | 420  | 204  | 212 | 0.51 | deleterious(0)    | Probably damaging(0.994) | Sanger |
|       | RUNX1  | chr21 | 34799384  | 7/8   | ENST00000300305.5:c.883dup         | ENSP00000300305.3:p.Ser295PhefsTer305 | no  | no  | no  | C | yes | NA                                                                                                                                                   | 764  | 478  | 274 | 0.36 | NA                | NA                       | Sanger |
| 2-009 | FLT3   | chr13 | 28052579  | 5/24  | ENST00000241453.9:c.580G>A         | ENSP00000241453.7:p.Val194Met         | no  | yes | yes | B | no  | rs146030737,COSM28039                                                                                                                                | 145  | 16   | 118 | 0.88 | tolerated(0.05)   | benign(0.15)             | Sanger |
|       | TET2   | chr4  | 105237193 | 3/11  | ENST00000380013.6:c.3251A>C        | ENSP00000369351.4:p.Gln1084Pro        | no  | no  | yes | D | no  | rs75056899                                                                                                                                           | 26   | 16   | 10  | 0.38 | tolerated(0.06)   | benign(0.01)             | Sanger |
|       | CEBPA  | chr19 | 33301478  | 1/1   | ENST00000498907.2:c.934_936dup     | ENSP00000427514.1:p.Gln312dup         | no  | yes | no  | B | no  | COSM18915,COSM18466,COSM249784,COSM97055                                                                                                             | 2367 | 1532 | 819 | 0.35 | NA                | NA                       | Sanger |
|       | CEBPA  | chr19 | 33302075  | 1/1   | ENST00000498907.2:c.332_339del     | ENSP00000427514.1:p.Ala111GlyfsTer56  | no  | yes | no  | B | yes | COSM20917,COSM29253                                                                                                                                  | 728  | 244  | 381 | 0.61 | NA                | NA                       | Sanger |
| 2-010 | TET2   | chr4  | 105275662 | 11/11 | ENST00000380013.6:c.5152G>T        | ENSP00000369351.4:p.Val1718Leu        | no  | yes | yes | B | no  | rs142312318,COSM41742                                                                                                                                | 103  | 67   | 35  | 0.34 | tolerated(0.34)   | benign(0.006)            | Sanger |
|       | NRAS   | chr1  | 114716127 | 2/7   | ENST00000369535.4:c.34G>T          | ENSP00000358548.4:p.Gly12Cys          | yes | yes | no  | A | yes | COSM562,COSM561,COSM563                                                                                                                              | 138  | 78   | 57  | 0.42 | deleterious(0.04) | Probably damaging(0.955) | Sanger |
| 2-011 | FLT3   | chr13 | 28018502  | 20/24 | ENST00000241453.9:c.2503_2505del   | ENSP00000241453.7:p.Asp835del         | yes | yes | yes | A | yes | rs121913486,COSM796,COSM854                                                                                                                          | 1228 | 890  | 210 | 0.19 | NA                | NA                       | Sanger |
|       | FLT3   | chr13 | 28018505  | 20/24 | ENST00000241453.9:c.2503G>T        | ENSP00000241453.7:p.Asp835Tyr         | yes | yes | no  | A | yes | KinMutBase_FLT3_DNA:g.53109G>T,KinMutBase_FLT3_DNA:g.53109G>C,KinMutBase_FLT3_DNA:g.53109G>A,KinMutBase_FLT3_DNA:g.53109delG,COSM783,COSM789,COSM785 | 1197 | 554  | 300 | 0.35 | deleterious(0)    | Probably damaging(1)     | Sanger |
|       | IDH1   | chr2  | 208248388 | 4/10  | ENST00000345146.4:c.395G>A         | ENSP00000260985.2:p.Arg132His         | yes | yes | yes | A | yes | COSM28746,COSM28750,rs121913500                                                                                                                      | 292  | 162  | 129 | 0.44 | deleterious(0)    | Possibly damaging(0.813) | Sanger |
|       | NPM1   | chr5  | 171410539 | 12/12 | ENST00000517671.3:c.860_863dup     | ENSP00000428755.1:p.Trp288CysfsTer12  | yes | yes | no  | A | yes | COSM1319222,COSM255167,COSM46518,COSM158604                                                                                                          | 1821 | 1167 | 645 | 0.36 | NA                | NA                       | Sanger |
| 2-012 | NPM1   | chr5  | 171410541 | 12/12 | ENST00000517671.3:c.863_864insCTTG | ENSP00000428755.1:p.Trp288CysfsTer12  | yes | yes | no  | A | yes | COSM158600,COSM27392,COSM1319221,COSM20861                                                                                                           | 421  | 274  | 146 | 0.35 | NA                | NA                       | Sanger |
| 2-013 | RUNX1  | chr21 | 34880640  | 4/8   | ENST00000300305.5:c.423_424dup     | ENSP00000300305.3:p.Ala142GlyfsTer4   | no  | yes | no  | B | yes | COSM1717863                                                                                                                                          | 323  | 234  | 86  | 0.27 | NA                | NA                       | Sanger |
| 2-014 | KIT    | chr4  | 54658066  | 1/21  | ENST00000288135.5:c.52C>T          | ENSP00000288135.5:p.Leu18Phe          | no  | no  | yes | D | no  | rs370787811                                                                                                                                          | 97   | 51   | 46  | 0.47 | tolerated(0.29)   | benign(0.008)            | Sanger |
|       | RUNX1  | chr21 | 34887027  | 3/8   | ENST00000300305.5:c.167T>C         | ENSP00000300305.3:p.Leu56Ser          | no  | yes | yes | B | no  | rs111527738,COSM24756                                                                                                                                | 257  | 125  | 130 | 0.51 | tolerated(0.66)   | Possibly damaging(0.812) | Sanger |
|       | CEBPA  | chr19 | 33301825  | 1/1   | ENST00000498907.2:c.584_589dup     | ENSP00000427514.1:p.His195_Pro196dup  | no  | no  | no  | C | no  | NA                                                                                                                                                   | 94   | 81   | 10  | 0.11 | NA                | NA                       | Sanger |
| 2-015 | DNMT3A | chr2  | 25244603  | 14/23 | ENST00000321117.7:c.1583_1603dup   | ENSP00000324375.5:p.Tyr528_Gln534dup  | no  | no  | no  | C | no  | NA                                                                                                                                                   | 229  | 202  | 26  | 0.11 | NA                | NA                       | Sanger |
|       | TET2   | chr4  | 105272692 | 10/11 | ENST00000380013.6:c.4317dup        | ENSP00000369351.4:p.Arg1440ThrfsTer38 | no  | no  | no  | C | yes | NA                                                                                                                                                   | 99   | 85   | 12  | 0.12 | NA                | NA                       | NGS    |
|       | NPM1   | chr5  | 171410539 | 12/12 | ENST00000517671.3:c.860_863dup     | ENSP00000428755.1:p.Trp288CysfsTer12  | yes | yes | no  | A | yes | COSM1319222,COSM255167,COSM46518,COSM158604                                                                                                          | 2382 | 1533 | 840 | 0.35 | NA                | NA                       | Sanger |
| 2-016 | DNMT3A | chr2  | 25244580  | 14/23 | ENST00000321117.7:c.1627G>T        | ENSP00000324375.5:p.Gly543Cys         | no  | yes | no  | B | no  | COSM87002                                                                                                                                            | 105  | 48   | 57  | 0.54 | deleterious(0)    | Probably damaging(1)     | Sanger |
|       | TET2   | chr4  | 105234042 | 3/11  | ENST00000380013.6:c.100C>T         | ENSP00000369351.4:p.Leu34Phe          | no  | no  | yes | D | no  | rs111948941                                                                                                                                          | 73   | 28   | 40  | 0.59 | deleterious(0.01) | benign(0.384)            | Sanger |
|       | NPM1   | chr5  | 171410539 | 12/12 | ENST00000517671.3:c.860_863dup     | ENSP00000428755.1:p.Trp288CysfsTer12  | yes | yes | no  | A | yes | COSM1319222,COSM255167,COSM46518,COSM158604                                                                                                          | 1477 | 911  | 560 | 0.38 | NA                | NA                       | Sanger |
|       | WT1    | chr11 | 32391978  | 9/10  | ENST00000332351.5:c.1426A>G        | ENSP00000331327.3:p.Lys476Glu         | no  | no  | no  | C | no  | NA                                                                                                                                                   | 75   | 47   | 9   | 0.16 | deleterious(0.02) | Probably damaging(0.996) | Sanger |

|       |        |           |           |                                |                                                    |                                                              |     |     |     |     |                                             |                                                                                                                                                                                                                  |      |      |      |                 |                          |                          |                      |
|-------|--------|-----------|-----------|--------------------------------|----------------------------------------------------|--------------------------------------------------------------|-----|-----|-----|-----|---------------------------------------------|------------------------------------------------------------------------------------------------------------------------------------------------------------------------------------------------------------------|------|------|------|-----------------|--------------------------|--------------------------|----------------------|
| 2-018 | FLT3   | chr13     | 28034114  | 14/24                          | ENST00000241453.9:c.1781_1804dup                   | ENSP00000241453.7:p.Leu601_Lys602insIleArgGluTyrGluTyrAspLeu | yes | yes | no  | A   | no                                          | COSM1317921,COSM19855                                                                                                                                                                                            | 736  | 617  | 112  | 0.15            | NA                       | NA                       | Sanger               |
|       | NPM1   | chr5      | 171410539 | 12/12                          | ENST00000517671.3:c.860_863dup                     | ENSP00000428755.1:p.Trp288CysfsTer12                         | yes | yes | no  | A   | yes                                         | COSM1319222,COSM255167,COSM46518,COSM158604                                                                                                                                                                      | 1625 | 861  | 751  | 0.46            | NA                       | NA                       | Sanger               |
| 2-019 | TP53   | chr17     | 7674885   | 6/11                           | ENST00000269305.6:c.646G>A                         | ENSP00000269305.4:p.Val216Met                                | no  | yes | no  | B   | yes                                         | TP53_g.12715G>A,TP53_g.12715G>T,TP53_g.12715G>C,TP53_g.12715del,CX952222,COSM1386670,COSM120097,COSM1644280,COSM3388195,COSM1386671,COSM120096,COSM120095,COSM1386669,COSM1386668,COSM120098,COSM10667,COSM11210 | 229  | 5    | 219  | 0.98            | deleterious(0)           | Probably damaging(1)     | Sanger               |
| 2-020 | ASXL1  | chr20     | 32434789  | 13/13                          | ENST00000375687.6:c.2077C>T                        | ENSP00000364839.4:p.Arg693Ter                                | yes | yes | yes | A   | yes                                         | rs373221034,COSM51388                                                                                                                                                                                            | 141  | 72   | 67   | 0.48            | NA                       | NA                       | Sanger               |
| 2-021 | RUNX1  | chr21     | 34886877  | 3/8                            | ENST00000300305.5:c.317G>C                         | ENSP00000300305.3:p.Trp106Ser                                | no  | no  | no  | C   | no                                          | NA                                                                                                                                                                                                               | 732  | 7    | 699  | 0.99            | deleterious(0)           | Probably damaging(1)     | Sanger               |
|       | ASXL1  | chr20     | 32434599  | 13/13                          | ENST00000375687.6:c.1900_1922del                   | ENSP00000364839.4:p.Glu635ArgfsTer15                         | yes | yes | no  | A   | yes                                         | COSM51200                                                                                                                                                                                                        | 99   | 77   | 21   | 0.21            | NA                       | NA                       | Sanger               |
| 2-022 | FLT3   | chr13     | 28036022  | 11/24                          | ENST00000241453.9:c.1331A>T                        | ENSP00000241453.7:p.Glu444Val                                | no  | no  | no  | C   | no                                          | NA                                                                                                                                                                                                               | 1852 | 1139 | 691  | 0.38            | tolerated(0.11)          | benign(0.024)            | Sanger               |
| 2-023 | DNMT3A | chr2      | 25240672  | 18/23                          | ENST00000321117.7:c.2141C>G                        | ENSP00000324375.5:p.Ser714Cys                                | no  | yes | yes | B   | yes                                         | rs367909007,COSM442677,COSM87011                                                                                                                                                                                 | 246  | 128  | 117  | 0.48            | deleterious(0.01)        | Probably damaging(0.999) | Sanger               |
|       | RUNX1  | chr21     | 34792223  | 8/8                            | ENST00000300305.5:c.1342_1354dup                   | ENSP00000300305.3:p.Val452GlufsTer152                        | no  | no  | no  | C   | yes                                         | NA                                                                                                                                                                                                               | 710  | 503  | 195  | 0.28            | NA                       | NA                       | Sanger               |
|       | NPM1   | chr5      | 171410539 | 12/12                          | ENST00000517671.3:c.860_863dup                     | ENSP00000428755.1:p.Trp288CysfsTer12                         | yes | yes | no  | A   | yes                                         | COSM1319222,COSM255167,COSM46518,COSM158604                                                                                                                                                                      | 1792 | 1171 | 613  | 0.34            | NA                       | NA                       | Sanger               |
| 2-024 | DNMT3A | chr2      | 25240666  | 18/23                          | ENST00000321117.7:c.2147T>A                        | ENSP00000324375.5:p.Val716Asp                                | no  | yes | no  | B   | yes                                         | COSM1583097                                                                                                                                                                                                      | 50   | 26   | 24   | 0.48            | deleterious(0)           | Probably damaging(0.999) | Sanger               |
|       | RUNX1  | chr21     | 34886871  | 3/8                            | ENST00000300305.5:c.323G>C                         | ENSP00000300305.3:p.Cys108Ser                                | no  | no  | no  | C   | no                                          | NA                                                                                                                                                                                                               | 258  | 142  | 106  | 0.43            | tolerated(0.27)          | Probably damaging(0.998) | NGS <sup>18</sup>    |
|       |        | chr21     | 34886872  | 3/8                            | ENST00000300305.5:c.322T>A                         | ENSP00000300305.3:p.Cys108Ser                                | no  | no  | no  | C   | no                                          | NA                                                                                                                                                                                                               | 254  | 140  | 104  | 0.43            | tolerated(0.27)          | Probably damaging(0.998) | NGS <sup>18</sup>    |
|       | chr21  | 34886874  | 3/8       | ENST00000300305.5:c.320G>A     | ENSP00000300305.3:p.Arg107His                      | no                                                           | yes | no  | B   | no  | COSM36056                                   | 257                                                                                                                                                                                                              | 141  | 106  | 0.43 | deleterious(0)  | Probably damaging(0.999) | NGS <sup>18</sup>        |                      |
| TET2  | chr4   | 105275613 | 11/11     | ENST00000380013.6:c.5103G>A    | ENSP00000369351.4:p.Met1701Ile                     | no                                                           | no  | yes | D   | no  | rs62623390                                  | 167                                                                                                                                                                                                              | 100  | 66   | 0.40 | tolerated(0.15) | benign(0.009)            | Sanger                   |                      |
| 2-025 | NRAS   | chr1      | 114713908 | 3/7                            | ENST00000369535.4:c.182A>G                         | ENSP00000358548.4:p.Gln61Arg                                 | yes | yes | no  | A   | yes                                         | COSM583,COSM584,COSM582                                                                                                                                                                                          | 186  | 136  | 48   | 0.26            | tolerated(0.06)          | benign(0.006)            | NGS                  |
|       | CEBPA  | chr19     | 33302154  | 1/1                            | ENST00000498907.2:c.260del                         | ENSP00000427514.1:p.Gln87ArgfsTer73                          | no  | no  | no  | C   | yes                                         | NA                                                                                                                                                                                                               | 1597 | 645  | 922  | 0.59            | NA                       | NA                       | Sanger               |
| 2-027 | IDH1   | chr2      | 208248389 | 4/10                           | ENST00000345146.4:c.394C>T                         | ENSP00000260985.2:p.Arg132Cys                                | yes | yes | yes | A   | yes                                         | COSM28749,COSM28747,COSM28748,rs121913499                                                                                                                                                                        | 178  | 95   | 80   | 0.46            | deleterious(0.03)        | Possibly damaging(0.907) | Sanger               |
|       | ASXL1  | chr20     | 32434638  | 13/13                          | ENST00000375687.6:c.1934dup                        | ENSP00000364839.4:p.Gly646TrpfsTer12                         | yes | yes | no  | A   | yes                                         | COSM1411076                                                                                                                                                                                                      | 75   | 57   | 16   | 0.22            | NA                       | NA                       | Sanger               |
|       | NRAS   | chr1      | 114713909 | 3/7                            | ENST00000369535.4:c.181C>A                         | ENSP00000358548.4:p.Gln61Lys                                 | yes | yes | yes | A   | yes                                         | rs121913254,COSM580,COSM581                                                                                                                                                                                      | 109  | 61   | 46   | 0.43            | deleterious(0.01)        | benign(0.045)            | Sanger               |
| 2-028 | DNMT3A | chr2      | 25248139  | 7/23                           | ENST00000321117.7:c.752dup                         | ENSP00000324375.5:p.Asp252Ter                                | no  | no  | no  | C   | yes                                         | NA                                                                                                                                                                                                               | 53   | 6    | 43   | 0.88            | NA                       | NA                       | Sanger               |
|       | TET2   | chr4      | 105234350 | 3/11                           | ENST00000380013.6:c.409del                         | ENSP00000369351.4:p.Ser137ValfsTer8                          | no  | no  | no  | C   | yes                                         | NA                                                                                                                                                                                                               | 140  | 66   | 75   | 0.53            | NA                       | NA                       | Sanger               |
|       | TET2   | chr4      | 105236721 | 3/11                           | ENST00000380013.6:c.2784del                        | ENSP00000369351.4:p.Pro929LeufsTer24                         | no  | no  | no  | C   | yes                                         | NA                                                                                                                                                                                                               | 98   | 61   | 36   | 0.37            | NA                       | NA                       | Sanger               |
|       | NPM1   | chr5      | 171410539 | 12/12                          | ENST00000517671.3:c.860_863dup                     | ENSP00000428755.1:p.Trp288CysfsTer12                         | yes | yes | no  | A   | yes                                         | COSM1319222,COSM255167,COSM46518,COSM158604                                                                                                                                                                      | 612  | 408  | 202  | 0.33            | NA                       | NA                       | Sanger               |
| 2-029 | DNMT3A | chr2      | 25234367  | 23/23                          | ENST00000321117.7:c.2651C>T                        | ENSP00000324375.5:p.Ala884Val                                | no  | yes | no  | B   | yes                                         | COSM231547                                                                                                                                                                                                       | 81   | 46   | 34   | 0.43            | deleterious(0.01)        | Probably damaging(0.998) | Sanger               |
|       | IDH1   | chr2      | 208245342 | 5/10                           | ENST00000345146.4:c.497C>T                         | ENSP00000260985.2:p.Thr166Ile                                | no  | no  | no  | C   | no                                          | NA                                                                                                                                                                                                               | 1520 | 732  | 775  | 0.51            | deleterious(0.05)        | benign(0.039)            | Sanger               |
| NPM1  | chr5   | 171410539 | 12/12     | ENST00000517671.3:c.860_863dup | ENSP00000428755.1:p.Trp288CysfsTer12               | yes                                                          | yes | no  | A   | yes | COSM1319222,COSM255167,COSM46518,COSM158604 | 713                                                                                                                                                                                                              | 450  | 260  | 0.37 | NA              | NA                       | Sanger                   |                      |
| 2-030 | DNMT3A | chr2      | 25243931  | 16/23                          | ENST00000321117.7:c.1903C>T                        | ENSP00000324375.5:p.Arg635Trp                                | no  | yes | yes | B   | yes                                         | rs144689354,COSM1407108,COSM87012                                                                                                                                                                                | 246  | 147  | 97   | 0.40            | deleterious(0)           | Possibly damaging(0.854) | Sanger               |
|       | NPM1   | chr5      | 171410539 | 12/12                          | ENST00000517671.3:c.860_863dup                     | ENSP00000428755.1:p.Trp288CysfsTer12                         | yes | yes | no  | A   | yes                                         | COSM1319222,COSM255167,COSM46518,COSM158604                                                                                                                                                                      | 1775 | 1154 | 619  | 0.35            | NA                       | NA                       | Sanger               |
|       | IDH2   | chr15     | 90088702  | 4/11                           | ENST00000330062.5:c.419G>A                         | ENSP00000331897.3:p.Arg140Gln                                | yes | yes | yes | A   | yes                                         | rs121913502,COSM41875,COSM41590                                                                                                                                                                                  | 617  | 332  | 284  | 0.46            | deleterious(0)           | Probably damaging(1)     | Sanger               |
|       | WT1    | chr11     | 32396358  | 7/10                           | ENST00000332351.5:c.1143_1147dup                   | ENSP00000331327.3:p.Ser383TrpfsTer68                         | no  | no  | no  | C   | yes                                         | NA                                                                                                                                                                                                               | 88   | 66   | 20   | 0.23            | NA                       | NA                       | NGS                  |
| 2-032 | FLT3   | chr13     | 28034125  | 14/24                          | ENST00000241453.9:c.1793_1794insGCCCTTCAGAGAATATGA | ENSP00000241453.7:p.Glu598_Tyr599insProPheArgGluTyrGlu       | yes | yes | no  | A   | no                                          | COSM19961,COSM1317913,COSM1317912                                                                                                                                                                                | 677  | 414  | 248  | 0.37            | NA                       | NA                       | Sanger               |
|       | WT1    | chr11     | 32396365  | 7/10                           | ENST00000332351.5:c.1140dup                        | ENSP00000331327.3:p.Ser381ValfsTer4                          | no  | yes | no  | B   | yes                                         | COSM1166635,COSM41864,COSM30772,COSM52939,COSM41855,COSM27301                                                                                                                                                    | 20   | 0    | 19   | 1.0             | NA                       | NA                       | Sanger <sup>18</sup> |

|       |        |       |           |       |                                       |                                                        |     |     |     |   |     |                                                                                                        |      |      |     |      |                   |                          |                      |
|-------|--------|-------|-----------|-------|---------------------------------------|--------------------------------------------------------|-----|-----|-----|---|-----|--------------------------------------------------------------------------------------------------------|------|------|-----|------|-------------------|--------------------------|----------------------|
|       |        | chr11 | 32396368  | 7/10  | ENST00000332351.5:c.1138C>G           | ENSP00000331327.3:p.Arg380Gly                          | no  | yes | no  | B | no  | COSM1585731,COSM28984,COSM926360,COSM30695,COSM28864,COSM35996,COSM49047,COSM49058,COSM27299,COSM30690 | 20   | 0    | 19  | 1.0  | deleterious(0)    | probably damaging(0.998) | Sanger <sup>18</sup> |
| 2-033 | FLT3   | chr13 | 28034116  | 14/24 | ENST00000241453.9:c.1779_1802dup      | ENSP00000241453.7:p.Phe594_Leu601dup                   | yes | no  | no  | A | no  | NA                                                                                                     | 974  | 708  | 251 | 0.26 | NA                | NA                       | Sanger               |
|       | TET2   | chr4  | 105234647 | 3/11  | ENST00000380013.6:c.706del            | ENSP00000369351.4:p.Asp236IlefsTer14                   | no  | no  | no  | C | yes | NA                                                                                                     | 48   | 31   | 13  | 0.30 | NA                | NA                       | Sanger               |
|       | TET2   | chr4  | 105275653 | 11/11 | ENST00000380013.6:c.5145_5151del      | ENSP00000369351.4:p.His1716Ter                         | no  | no  | no  | C | yes | NA                                                                                                     | 123  | 78   | 43  | 0.35 | NA                | NA                       | Sanger               |
|       | NPM1   | chr5  | 171410539 | 12/12 | ENST00000517671.3:c.860_863dup        | ENSP00000428755.1:p.Trp288CysfsTer12                   | yes | yes | no  | A | yes | COSM1319222,COSM255167,COSM46518,COSM158604                                                            | 1433 | 922  | 507 | 0.35 | NA                | NA                       | Sanger               |
| 2-034 | FLT3   | chr13 | 28034345  | 13/24 | ENST00000241453.9:c.1660T>A           | ENSP00000241453.7:p.Phe554Ile                          | no  | no  | no  | C | no  | NA                                                                                                     | 608  | 325  | 280 | 0.46 | tolerated(0.34)   | benign(0.41)             | Sanger               |
|       | FLT3   | chr13 | 28034347  | 13/24 | ENST00000241453.9:c.1658T>C           | ENSP00000241453.7:p.Leu553Pro                          | no  | no  | no  | C | no  | NA                                                                                                     | 601  | 318  | 280 | 0.46 | deleterious(0.04) | benign(0)                | Sanger               |
|       | TET2   | chr4  | 105275613 | 11/11 | ENST00000380013.6:c.5103G>A           | ENSP00000369351.4:p.Met1701Ile                         | no  | no  | yes | D | no  | rs62623390                                                                                             | 277  | 136  | 141 | 0.51 | tolerated(0.15)   | benign(0.009)            | Sanger               |
|       | NPM1   | chr5  | 171410539 | 12/12 | ENST00000517671.3:c.860_863dup        | ENSP00000428755.1:p.Trp288CysfsTer12                   | yes | yes | no  | A | yes | COSM1319222,COSM255167,COSM46518,COSM158604                                                            | 588  | 398  | 188 | 0.32 | NA                | NA                       | Sanger               |
| 2-035 | FLT3   | chr13 | 28034125  | 14/24 | ENST00000241453.9:c.1776_1793dup      | ENSP00000241453.7:p.Tyr597_Glu598insAspAspPheArgGluTyr | yes | yes | no  | A | no  | COSM19961,COSM1317913,COSM1317912                                                                      | 1123 | 658  | 434 | 0.39 | NA                | NA                       | Sanger               |
|       | ASXL1  | chr20 | 32436018  | 13/13 | ENST00000375687.6:c.3306G>T           | ENSP00000364839.4:p.Glu1102Asp                         | yes | yes | yes | A | no  | rs139115934,COSM36205,COSM1155723                                                                      | 334  | 185  | 147 | 0.44 | deleterious(0.03) | probably damaging(0.911) | Sanger               |
|       | NPM1   | chr5  | 171410539 | 12/12 | ENST00000517671.3:c.860_863dup        | ENSP00000428755.1:p.Trp288CysfsTer12                   | yes | yes | no  | A | yes | COSM1319222,COSM255167,COSM46518,COSM158604                                                            | 2112 | 1363 | 742 | 0.35 | NA                | NA                       | Sanger               |
| 2-036 | DNMT3A | chr2  | 25234373  | 23/23 | ENST00000321117.7:c.2645G>C           | ENSP00000324375.5:p.Arg882Pro                          | yes | yes | yes | A | yes | rs147001633,COSM442676,COSM3356083,COSM1583129,COSM99740,COSM52944                                     | 157  | 66   | 89  | 0.57 | deleterious(0)    | probably damaging(0.997) | Sanger               |
|       | RUNX1  | chr21 | 34887027  | 3/8   | ENST00000300305.5:c.167T>C            | ENSP00000300305.3:p.Leu56Ser                           | no  | yes | yes | B | no  | rs11527738,COSM24756                                                                                   | 387  | 204  | 174 | 0.46 | tolerated(0.66)   | possibly damaging(0.812) | Sanger               |
|       | CEBPA  | chr19 | 33302075  | 1/1   | ENST00000498907.2:c.332_339del        | ENSP00000427514.1:p.Ala111GlyfsTer56                   | no  | yes | no  | B | yes | COSM20917,COSM29253                                                                                    | 176  | 95   | 61  | 0.39 | NA                | NA                       | Sanger               |
| 2-037 | RUNX1  | chr21 | 34859495  | 5/8   | ENST00000300305.5:c.592G>A            | ENSP00000300305.3:p.Asp198Asn                          | no  | yes | no  | B | no  | CM013280,COSM24721                                                                                     | 320  | 205  | 108 | 0.35 | deleterious(0.02) | possibly damaging(0.633) | Sanger               |
|       | ASXL1  | chr20 | 32434638  | 13/13 | ENST00000375687.6:c.1934dup           | ENSP00000364839.4:p.Gly646TrpfsTer12                   | yes | yes | no  | A | yes | COSM1411076                                                                                            | 57   | 52   | 6   | 0.10 | NA                | NA                       | Sanger               |
| 2-038 | NRAS   | chr1  | 114713908 | 3/7   | ENST00000369535.4:c.182A>G            | ENSP00000358548.4:p.Gln61Arg                           | yes | yes | no  | A | yes | COSM583,COSM584,COSM582                                                                                | 130  | 110  | 15  | 0.12 | tolerated(0.06)   | benign(0.006)            | NGS <sup>18</sup>    |
|       |        | chr1  | 114713909 | 3/7   | ENST00000369535.4:c.181C>A            | ENSP00000358548.4:p.Gln61Lys                           | yes | yes | yes | A | yes | rs121913254,COSM580,COSM581                                                                            | 128  | 108  | 15  | 0.12 | deleterious(0.01) | benign(0.045)            | NGS <sup>18</sup>    |
|       | NRAS   | chr1  | 114716126 | 2/7   | ENST00000369535.4:c.35G>C             | ENSP00000358548.4:p.Gly12Ala                           | yes | yes | no  | A | yes | COSM565,COSM566,COSM564                                                                                | 117  | 74   | 39  | 0.35 | deleterious(0.02) | benign(0.267)            | Sanger               |
| 2-039 | RUNX1  | chr21 | 34886865  | 3/8   | ENST00000300305.5:c.329A>G            | ENSP00000300305.3:p.Lys110Arg                          | no  | yes | no  | B | no  | COSM26024                                                                                              | 119  | 73   | 42  | 0.37 | deleterious(0)    | probably damaging(0.996) | Sanger               |
|       | CEBPA  | chr19 | 33301475  | 1/1   | ENST00000498907.2:c.937_939dup        | ENSP00000427514.1:p.Lys313dup                          | no  | yes | no  | B | no  | COSM18099,COSM18541,COSM18901,COSM29139,COSM18640,COSM18103                                            | 2262 | 1469 | 780 | 0.35 | NA                | NA                       | Sanger               |
|       | CEBPA  | chr19 | 33302060  | 1/1   | ENST00000498907.2:c.354del            | ENSP00000427514.1:p.Val119SerfsTer41                   | no  | no  | no  | C | yes | NA                                                                                                     | 517  | 204  | 215 | 0.51 | NA                | NA                       | Sanger               |
| 2-040 | DNMT3A | chr2  | 25234373  | 23/23 | ENST00000321117.7:c.2645G>C           | ENSP00000324375.5:p.Arg882Pro                          | yes | yes | yes | A | yes | rs147001633,COSM442676,COSM3356083,COSM1583129,COSM99740,COSM52944                                     | 241  | 114  | 125 | 0.52 | deleterious(0)    | probably damaging(0.997) | Sanger               |
|       | RUNX1  | chr21 | 34887027  | 3/8   | ENST00000300305.5:c.167T>C            | ENSP00000300305.3:p.Leu56Ser                           | no  | yes | yes | B | no  | rs11527738,COSM24756                                                                                   | 380  | 184  | 191 | 0.51 | tolerated(0.66)   | possibly damaging(0.812) | Sanger               |
|       | WT1    | chr11 | 32396399  | 7/10  | ENST00000332351.5:c.1106dup           | ENSP00000331327.3:p.Arg370ThrfsTer15                   | no  | yes | no  | B | yes | COSM1317323,COSM144849,COSM52938                                                                       | 58   | 12   | 44  | 0.79 | NA                | NA                       | Sanger <sup>18</sup> |
|       |        | chr11 | 32396401  | 7/10  | ENST00000332351.5:c.1105C>G           | ENSP00000331327.3:p.Arg369Gly                          | no  | yes | no  | B | no  | CM971594,COSM35989,COSM21441,COSM30689,COSM28960,COSM28970                                             | 51   | 1    | 48  | 0.96 | deleterious(0)    | probably damaging(0.998) | Sanger <sup>18</sup> |
| 2-041 | DNMT3A | chr2  | 25234374  | 23/23 | ENST00000321117.7:c.2644C>T           | ENSP00000324375.5:p.Arg882Cys                          | yes | yes | yes | A | yes | rs377577594,COSM1166704,COSM1583136,COSM53042,COSM87001                                                | 52   | 31   | 21  | 0.40 | deleterious(0)    | probably damaging(0.997) | Sanger               |
|       | TET2   | chr4  | 105234995 | 3/11  | ENST00000380013.6:c.1054del           | ENSP00000369351.4:p.Phe352SerfsTer20                   | no  | no  | no  | C | yes | NA                                                                                                     | 121  | 70   | 47  | 0.40 | NA                | NA                       | NGS                  |
|       | NPM1   | chr5  | 171410539 | 12/12 | ENST00000517671.3:c.860_863dup        | ENSP00000428755.1:p.Trp288CysfsTer12                   | yes | yes | no  | A | yes | COSM1319222,COSM255167,COSM46518,COSM158604                                                            | 339  | 216  | 120 | 0.36 | NA                | NA                       | Sanger               |
| 2-044 | FLT3   | chr13 | 28049450  | 8/24  | ENST00000241453.9:c.970G>A            | ENSP00000241453.7:p.Asp324Asn                          | no  | yes | yes | B | no  | rs35602083,CM066823,COSM28040                                                                          | 347  | 178  | 168 | 0.49 | tolerated(0.33)   | benign(0.035)            | Sanger               |
|       |        | chr4  | 54723599  | 8/21  | ENST00000288135.5:c.1248_1249del      | ENSP00000288135.5:p.Thr417LeufsTer30                   | yes | no  | no  | C | no  | NA                                                                                                     | 118  | 102  | 15  | 0.13 | NA                | NA                       | NGS                  |
|       |        | chr4  | 54723605  | 8/21  | ENST00000288135.5:c.1254_1255insCTCTT | ENSP00000288135.5:p.Tyr418_Asp419insPhePhe             | yes | yes | no  | A | no  | COSM1319324                                                                                            | 108  | 88   | 18  | 0.17 | NA                | NA                       | NGS <sup>18</sup>    |
|       |        | chr4  | 54723606  | 8/21  | ENST00000288135.5:c.1255_1258del      | ENSP00000288135.5:p.Asp419GlyfsTer3                    | yes | yes | no  | A | no  | COSM1153,COSM1600400                                                                                   | 127  | 110  | 15  | 0.12 | NA                | NA                       | NGS <sup>18</sup>    |

|       |        |       |           |       |                                          |                                           |     |     |     |   |     |                                                                                                           |      |      |     |      |                       |                             |        |
|-------|--------|-------|-----------|-------|------------------------------------------|-------------------------------------------|-----|-----|-----|---|-----|-----------------------------------------------------------------------------------------------------------|------|------|-----|------|-----------------------|-----------------------------|--------|
| 2-045 | WT1    | chr11 | 32392014  | 9/10  | ENST00000332351.5:c.1390G>C              | ENSP00000331327.3:p.Asp464His             | no  | yes | yes | B | no  | rs28941778,CM003970,CM910413,COSM1353484,CO<br>SM27292,COSM27370                                          | 26   | 0    | 24  | 1.00 | deleterious<br>(0)    | probably<br>damaging(1)     | Sanger |
|       | NRAS   | chr1  | 114713907 | 3/7   | ENST00000369535.4:c.183A>T               | ENSP00000358548.4:p.Gln61His              | yes | yes | yes | A | yes | rs121913255,COSM587,COSM585,COSM586                                                                       | 180  | 112  | 64  | 0.36 | deleterious<br>(0)    | possibly<br>damaging(0.531) | Sanger |
|       | CEBPA  | chr19 | 33301475  | 1/1   | ENST00000498907.2:c.937_939dup           | ENSP00000427514.1:p.Lys313dup             | no  | yes | no  | B | no  | COSM18099,COSM18541,COSM18901,COSM29139,C<br>OSM18640,COSM18103                                           | 836  | 634  | 200 | 0.24 | NA                    | NA                          | Sanger |
|       | CEBPA  | chr19 | 33302118  | 1/1   | ENST00000498907.2:c.296dup               | ENSP00000427514.1:p.Gly100ArgfsT<br>er8   | no  | no  | no  | C | yes | NA                                                                                                        | 224  | 64   | 117 | 0.64 | NA                    | NA                          | Sanger |
| 2-046 | DNMT3A | chr2  | 25234373  | 23/23 | ENST00000321117.7:c.2645G>A              | ENSP00000324375.5:p.Arg882His             | yes | yes | yes | A | yes | rs147001633,COSM442676,COSM3356083,COSM158<br>3129,COSM99740,COSM52944                                    | 70   | 37   | 33  | 0.47 | deleterious<br>(0.03) | probably<br>damaging(0.993) | Sanger |
|       | ASXL1  | chr20 | 32436018  | 13/13 | ENST00000375687.6:c.3306G>T              | ENSP00000364839.4:p.Glu1102Asp            | yes | yes | yes | A | no  | rs139115934,COSM36205,COSM1155723                                                                         | 186  | 98   | 86  | 0.47 | deleterious<br>(0.03) | probably<br>damaging(0.911) | Sanger |
|       | NPM1   | chr5  | 171410539 | 12/12 | ENST00000517671.3:c.860_863dup           | ENSP00000428755.1:p.Trp288Cysfs<br>Ter12  | yes | yes | no  | A | yes | COSM1319222,COSM255167,COSM46518,COSM158<br>604                                                           | 938  | 617  | 317 | 0.34 | NA                    | NA                          | Sanger |
| 2-048 | DNMT3A | chr2  | 25234373  | 23/23 | ENST00000321117.7:c.2645G>A              | ENSP00000324375.5:p.Arg882His             | yes | yes | yes | A | yes | rs147001633,COSM442676,COSM3356083,COSM158<br>3129,COSM99740,COSM52944                                    | 50   | 27   | 21  | 0.44 | deleterious<br>(0.03) | probably<br>damaging(0.993) | Sanger |
|       | FLT3   | chr13 | 28018503  | 20/24 | ENST00000241453.9:c.2505T>G              | ENSP00000241453.7:p.Asp835Glu             | yes | yes | yes | A | yes | rs121913487,KinMutBase_FLT3_DNA:g.53111T>A,Kin<br>MutBase_FLT3_DNA:g.53111T>G,COSM788,COSM78<br>7         | 535  | 242  | 275 | 0.53 | deleterious<br>(0)    | probably<br>damaging(0.997) | Sanger |
|       | NPM1   | chr5  | 171410539 | 12/12 | ENST00000517671.3:c.860_863dup           | ENSP00000428755.1:p.Trp288Cysfs<br>Ter12  | yes | yes | no  | A | yes | COSM1319222,COSM255167,COSM46518,COSM158<br>604                                                           | 617  | 413  | 202 | 0.33 | NA                    | NA                          | Sanger |
|       | CEBPA  | chr19 | 33301484  | 1/1   | ENST00000498907.2:c.930dup               | ENSP00000427514.1:p.Gln311AlafsT<br>er10  | no  | yes | no  | B | yes | COSM29601,COSM18472,COSM18648,COSM18902,C<br>OSM29259,COSM1318331,COSM29226                               | 346  | 213  | 125 | 0.37 | NA                    | NA                          | Sanger |
| 2-049 | DNMT3A | chr2  | 25234373  | 23/23 | ENST00000321117.7:c.2645G>C              | ENSP00000324375.5:p.Arg882Pro             | yes | yes | yes | A | yes | rs147001633,COSM442676,COSM3356083,COSM158<br>3129,COSM99740,COSM52944                                    | 41   | 26   | 14  | 0.35 | deleterious<br>(0)    | probably<br>damaging(0.997) | Sanger |
|       | RUNX1  | chr21 | 34887027  | 3/8   | ENST00000300305.5:c.167T>C               | ENSP00000300305.3:p.Leu56Ser              | no  | yes | yes | B | no  | rs111527738,COSM24756                                                                                     | 113  | 61   | 49  | 0.45 | tolerated(0.<br>66)   | possibly<br>damaging(0.812) | Sanger |
|       | NPM1   | chr5  | 171410539 | 12/12 | ENST00000517671.3:c.860_863dup           | ENSP00000428755.1:p.Trp288Cysfs<br>Ter12  | yes | yes | no  | A | yes | COSM1319222,COSM255167,COSM46518,COSM158<br>604                                                           | 489  | 304  | 185 | 0.38 | NA                    | NA                          | Sanger |
|       | IDH2   | chr15 | 90088702  | 4/11  | ENST00000330062.5:c.419G>A               | ENSP00000331897.3:p.Arg140Gln             | yes | yes | yes | A | yes | rs121913502,COSM41875,COSM41590                                                                           | 320  | 178  | 141 | 0.44 | deleterious<br>(0)    | probably<br>damaging(1)     | Sanger |
|       | NRAS   | chr1  | 114716126 | 2/7   | ENST00000369535.4:c.35G>A                | ENSP00000358548.4:p.Gly12Asp              | yes | yes | no  | A | yes | COSM565,COSM566,COSM564                                                                                   | 120  | 66   | 52  | 0.44 | deleterious<br>(0)    | possibly<br>damaging(0.726) | Sanger |
| 2-050 | FLT3   | chr13 | 28015643  | 21/24 | ENST00000241453.9:c.2600T>C              | ENSP00000241453.7:p.Ile867Thr             | no  | no  | no  | C | no  | NA                                                                                                        | 658  | 569  | 88  | 0.13 | deleterious<br>(0.01) | possibly<br>damaging(0.832) | NGS    |
|       | RUNX1  | chr21 | 34886866  | 3/8   | ENST00000300305.5:c.328A>C               | ENSP00000300305.3:p.Lys110Gln             | no  | no  | yes | D | no  | rs121912498                                                                                               | 453  | 6    | 446 | 0.99 | deleterious<br>(0)    | probably<br>damaging(0.995) | Sanger |
|       | TET2   | chr4  | 105272692 | 10/11 | ENST00000380013.6:c.4317dup              | ENSP00000369351.4:p.Arg1440Thrfs<br>Ter38 | no  | no  | no  | C | yes | NA                                                                                                        | 55   | 29   | 21  | 0.39 | NA                    | NA                          | Sanger |
|       | NRAS   | chr1  | 114713907 | 3/7   | ENST00000369535.4:c.183A>C               | ENSP00000358548.4:p.Gln61His              | yes | yes | yes | A | yes | rs121913255,COSM587,COSM585,COSM586                                                                       | 124  | 64   | 60  | 0.48 | deleterious<br>(0)    | possibly<br>damaging(0.531) | Sanger |
| 2-051 | NPM1   | chr5  | 171410539 | 12/12 | ENST00000517671.3:c.860_863dup           | ENSP00000428755.1:p.Trp288Cysfs<br>Ter12  | yes | yes | no  | A | yes | COSM1319222,COSM255167,COSM46518,COSM158<br>604                                                           | 2715 | 1782 | 924 | 0.34 | NA                    | NA                          | Sanger |
|       | IDH2   | chr15 | 90088702  | 4/11  | ENST00000330062.5:c.419G>A               | ENSP00000331897.3:p.Arg140Gln             | yes | yes | yes | A | yes | rs121913502,COSM41875,COSM41590                                                                           | 911  | 485  | 418 | 0.46 | deleterious<br>(0)    | probably<br>damaging(1)     | Sanger |
| 2-052 | IDH1   | chr2  | 208248388 | 4/10  | ENST00000345146.4:c.395G>A               | ENSP00000260985.2:p.Arg132His             | yes | yes | yes | A | yes | COSM28746,COSM28750,rs121913500                                                                           | 188  | 109  | 79  | 0.42 | deleterious<br>(0)    | possibly<br>damaging(0.813) | Sanger |
| 2-053 | KIT    | chr4  | 54733154  | 17/21 | ENST00000288135.5:c.2446G>T              | ENSP00000288135.5:p.Asp816Tyr             | yes | yes | yes | A | yes | rs121913506,KinMutBase_KIT_DNA:g.76139G>C,KinM<br>utBase_KIT_DNA:g.76139G>T,COSM1313,COSM1311<br>COSM1310 | 414  | 288  | 124 | 0.30 | deleterious<br>(0)    | probably<br>damaging(0.963) | Sanger |
|       | NRAS   | chr1  | 114713907 | 3/7   | ENST00000369535.4:c.183A>C               | ENSP00000358548.4:p.Gln61His              | yes | yes | yes | A | yes | rs121913255,COSM587,COSM585,COSM586                                                                       | 233  | 203  | 23  | 0.10 | deleterious<br>(0)    | possibly<br>damaging(0.531) | NGS    |
| 2-054 | DNMT3A | chr2  | 25240727  | 18/23 | ENST00000321117.7:c.2086C>T              | ENSP00000324375.5:p.Gln696Ter             | no  | yes | no  | B | yes | COSM1583101                                                                                               | 120  | 78   | 39  | 0.33 | NA                    | NA                          | Sanger |
| 3-001 | TET2   | chr4  | 105234042 | 3/11  | ENST00000380013.6:c.100C>T               | ENSP00000369351.4:p.Leu34Phe              | no  | no  | yes | D | no  | rs111948941                                                                                               | 40   | 26   | 12  | 0.32 | deleterious<br>(0.01) | benign(0.384)               | Sanger |
|       | TET2   | chr4  | 105272692 | 10/11 | ENST00000380013.6:c.4317dup              | ENSP00000369351.4:p.Arg1440Thrfs<br>Ter38 | no  | no  | no  | C | yes | NA                                                                                                        | 67   | 55   | 10  | 0.15 | NA                    | NA                          | NGS    |
| 3-003 | WT1    | chr11 | 32392029  | 9/10  | ENST00000332351.5:c.1374_1375<br>insCTCT | ENSP00000331327.3:p.Lys459Leufs<br>Ter2   | no  | no  | no  | C | yes | NA                                                                                                        | 18   | 7    | 8   | 0.53 | NA                    | NA                          | Sanger |
|       | CEBPA  | chr19 | 33302214  | 1/1   | ENST00000498907.2:c.196_200dup           | ENSP00000427514.1:p.Tyr67Ter              | no  | yes | no  | B | yes | COSM330607,COSM27453,COSM27463                                                                            | 678  | 368  | 305 | 0.45 | NA                    | NA                          | Sanger |
| 3-004 | DNMT3A | chr2  | 25234374  | 23/23 | ENST00000321117.7:c.2644C>T              | ENSP00000324375.5:p.Arg882Cys             | yes | yes | yes | A | yes | rs377577594,COSM1166704,COSM1583136,COSM53<br>042,COSM87001                                               | 113  | 53   | 60  | 0.53 | deleterious<br>(0)    | probably<br>damaging(0.997) | Sanger |
| 3-005 | DNMT3A | chr2  | 25234373  | 23/23 | ENST00000321117.7:c.2645G>A              | ENSP00000324375.5:p.Arg882His             | yes | yes | yes | A | yes | rs147001633,COSM442676,COSM3356083,COSM158<br>3129,COSM99740,COSM52944                                    | 36   | 20   | 15  | 0.43 | deleterious<br>(0.03) | probably<br>damaging(0.993) | Sanger |
|       | TET2   | chr4  | 105234042 | 3/11  | ENST00000380013.6:c.100C>T               | ENSP00000369351.4:p.Leu34Phe              | no  | no  | yes | D | no  | rs111948941                                                                                               | 97   | 54   | 41  | 0.43 | deleterious<br>(0.01) | benign(0.384)               | Sanger |



|       |        |       |           |       |                                  |                                                                       |     |     |     |   |     |                                                                                                                                                                                                                                                                                        |      |      |     |      |                   |                          |        |
|-------|--------|-------|-----------|-------|----------------------------------|-----------------------------------------------------------------------|-----|-----|-----|---|-----|----------------------------------------------------------------------------------------------------------------------------------------------------------------------------------------------------------------------------------------------------------------------------------------|------|------|-----|------|-------------------|--------------------------|--------|
|       | TET2   | chr4  | 105236491 | 3/11  | ENST00000380013.6:c.2549A>G      | ENSP00000369351.4:p.His850Arg                                         | no  | no  | yes | D | no  | rs369370690                                                                                                                                                                                                                                                                            | 90   | 46   | 42  | 0.48 | tolerated(0.18)   | benign(0.001)            | Sanger |
|       | NPM1   | chr5  | 171410539 | 12/12 | ENST00000517671.3:c.860_863dup   | ENSP00000428755.1:p.Trp288CysfsTer12                                  | yes | yes | no  | A | yes | COSM1319222,COSM255167,COSM46518,COSM158604                                                                                                                                                                                                                                            | 386  | 262  | 124 | 0.32 | NA                | NA                       | Sanger |
|       | DNMT3A | chr2  | 25245284  | 13/23 | ENST00000321117.7:c.1522del      | ENSP00000324375.5:p.Leu508SerfsTer143                                 | no  | no  | no  | C | yes | NA                                                                                                                                                                                                                                                                                     | 82   | 43   | 40  | 0.48 | NA                | NA                       | Sanger |
| 3-006 | IDH1   | chr2  | 208243577 | 6/10  | ENST00000345146.4:c.548A>G       | ENSP00000260985.2:p.Tyr183Cys                                         | no  | no  | yes | D | no  | rs34599179,CM073129                                                                                                                                                                                                                                                                    | 167  | 79   | 84  | 0.52 | deleterious(0)    | probably damaging(0.994) | Sanger |
|       | RUNX1  | chr21 | 34792566  | 8/8   | ENST00000300305.5:c.1011dup      | ENSP00000300305.3:p.Ala338ArgfsTer262                                 | no  | yes | no  | B | yes | COSM1717858                                                                                                                                                                                                                                                                            | 507  | 290  | 217 | 0.43 | NA                | NA                       | Sanger |
|       | IDH2   | chr15 | 90088702  | 4/11  | ENST00000330062.5:c.419G>A       | ENSP00000331897.3:p.Arg140Gln                                         | yes | yes | yes | A | yes | rs121913502,COSM41875,COSM41590                                                                                                                                                                                                                                                        | 952  | 515  | 433 | 0.46 | deleterious(0)    | probably damaging(1)     | Sanger |
| 3-007 | FLT3   | chr13 | 28049450  | 8/24  | ENST00000241453.9:c.970G>A       | ENSP00000241453.7:p.Asp324Asn                                         | no  | yes | yes | B | no  | rs35602083,CM066823,COSM28040                                                                                                                                                                                                                                                          | 351  | 200  | 148 | 0.43 | tolerated(0.33)   | benign(0.035)            | Sanger |
|       | KIT    | chr4  | 54733155  | 17/21 | ENST00000288135.5:c.2447A>T      | ENSP00000288135.5:p.Asp816Val                                         | yes | yes | yes | A | yes | rs121913507,KinMutBase_KIT_DNA:g.76140A>T,CM952169,COSM1314,COSM24675,COSM12711                                                                                                                                                                                                        | 369  | 131  | 237 | 0.64 | deleterious(0)    | probably damaging(0.977) | Sanger |
|       | TET2   | chr4  | 105272692 | 10/11 | ENST00000380013.6:c.4317dup      | ENSP00000369351.4:p.Arg1440ThrfsTer38                                 | no  | no  | no  | C | yes | NA                                                                                                                                                                                                                                                                                     | 78   | 66   | 9   | 0.12 | NA                | NA                       | NGS    |
|       | ASXL1  | chr20 | 32435346  | 13/13 | ENST00000375687.6:c.2634T>A      | ENSP00000364839.4:p.Ser878Arg                                         | yes | no  | no  | C | no  | NA                                                                                                                                                                                                                                                                                     | 157  | 89   | 68  | 0.43 | tolerated(0.09)   | benign(0.019)            | Sanger |
| 3-009 | DNMT3A | chr2  | 25240313  | 19/23 | ENST00000321117.7:c.2311C>T      | ENSP00000324375.5:p.Arg771Ter                                         | no  | yes | no  | B | yes | COSM1583105,COSM231563                                                                                                                                                                                                                                                                 | 101  | 61   | 32  | 0.34 | NA                | NA                       | Sanger |
|       | IDH1   | chr2  | 208248389 | 4/10  | ENST00000345146.4:c.394C>G       | ENSP00000260985.2:p.Arg132Gly                                         | yes | yes | yes | A | yes | COSM28749,COSM28747,COSM28748,rs121913499                                                                                                                                                                                                                                              | 183  | 79   | 102 | 0.56 | deleterious(0)    | probably damaging(0.998) | Sanger |
|       | NPM1   | chr5  | 171410539 | 12/12 | ENST00000517671.3:c.860_863dup   | ENSP00000428755.1:p.Trp288CysfsTer12                                  | yes | yes | no  | A | yes | COSM1319222,COSM255167,COSM46518,COSM158604                                                                                                                                                                                                                                            | 1933 | 1210 | 717 | 0.37 | NA                | NA                       | Sanger |
| 3-010 | FLT3   | chr13 | 28018503  | 20/24 | ENST00000241453.9:c.2505T>G      | ENSP00000241453.7:p.Asp835Glu                                         | yes | yes | yes | A | yes | rs121913487,KinMutBase_FLT3_DNA:g.53111T>A,KinMutBase_FLT3_DNA:g.53111T>G,COSM788,COSM787                                                                                                                                                                                              | 526  | 411  | 103 | 0.20 | deleterious(0)    | probably damaging(0.997) | Sanger |
|       | IDH1   | chr2  | 208243577 | 6/10  | ENST00000345146.4:c.548A>G       | ENSP00000260985.2:p.Tyr183Cys                                         | no  | no  | yes | D | no  | rs34599179,CM073129                                                                                                                                                                                                                                                                    | 86   | 42   | 44  | 0.51 | deleterious(0)    | probably damaging(0.994) | Sanger |
| 3-011 | FLT3   | chr13 | 28034113  | 14/24 | ENST00000241453.9:c.1773_1805dup | ENSP00000241453.7:p.Leu601_Lys602insAsnValAspPheArgGluTyrGluTyrAspLeu | yes | yes | no  | A | no  | COSM19882,COSM1317922                                                                                                                                                                                                                                                                  | 578  | 517  | 60  | 0.10 | NA                | NA                       | Sanger |
|       | NPM1   | chr5  | 171410539 | 12/12 | ENST00000517671.3:c.860_863dup   | ENSP00000428755.1:p.Trp288CysfsTer12                                  | yes | yes | no  | A | yes | COSM1319222,COSM255167,COSM46518,COSM158604                                                                                                                                                                                                                                            | 1308 | 825  | 479 | 0.37 | NA                | NA                       | Sanger |
|       | CEBPA  | chr19 | 33302046  | 1/1   | ENST00000498907.2:c.368dup       | ENSP00000427514.1:p.Ala124SerfsTer46                                  | no  | no  | no  | C | yes | NA                                                                                                                                                                                                                                                                                     | 373  | 168  | 154 | 0.48 | NA                | NA                       | Sanger |
| 3-012 | DNMT3A | chr2  | 25234374  | 23/23 | ENST00000321117.7:c.2644C>A      | ENSP00000324375.5:p.Arg882Ser                                         | yes | yes | yes | A | no  | rs377577594,COSM1166704,COSM1583136,COSM53042,COSM87001                                                                                                                                                                                                                                | 176  | 90   | 85  | 0.49 | deleterious(0)    | probably damaging(0.996) | Sanger |
|       | NPM1   | chr5  | 171410539 | 12/12 | ENST00000517671.3:c.860_863dup   | ENSP00000428755.1:p.Trp288CysfsTer12                                  | yes | yes | no  | A | yes | COSM1319222,COSM255167,COSM46518,COSM158604                                                                                                                                                                                                                                            | 1544 | 994  | 546 | 0.35 | NA                | NA                       | Sanger |
|       | WT1    | chr11 | 32434715  | 1/10  | ENST00000332351.5:c.630dup       | ENSP00000331327.3:p.Ala211ArgfsTer37                                  | no  | no  | no  | C | yes | NA                                                                                                                                                                                                                                                                                     | 54   | 34   | 20  | 0.37 | NA                | NA                       | Sanger |
| 3-013 | IDH1   | chr2  | 208243532 | 6/10  | ENST00000345146.4:c.593A>G       | ENSP00000260985.2:p.Gln198Arg                                         | no  | no  | yes | D | no  | rs374340555                                                                                                                                                                                                                                                                            | 395  | 208  | 186 | 0.47 | tolerated(0.19)   | benign(0.016)            | Sanger |
|       | TET2   | chr4  | 105235995 | 3/11  | ENST00000380013.6:c.2053C>T      | ENSP00000369351.4:p.Gln685Ter                                         | no  | no  | no  | C | yes | NA                                                                                                                                                                                                                                                                                     | 80   | 44   | 32  | 0.42 | NA                | NA                       | Sanger |
|       | NPM1   | chr5  | 171410539 | 12/12 | ENST00000517671.3:c.860_863dup   | ENSP00000428755.1:p.Trp288CysfsTer12                                  | yes | yes | no  | A | yes | COSM1319222,COSM255167,COSM46518,COSM158604                                                                                                                                                                                                                                            | 998  | 643  | 351 | 0.35 | NA                | NA                       | Sanger |
| 3-014 | TET2   | chr4  | 105272692 | 10/11 | ENST00000380013.6:c.4317dup      | ENSP00000369351.4:p.Arg1440ThrfsTer38                                 | no  | no  | no  | C | yes | NA                                                                                                                                                                                                                                                                                     | 137  | 121  | 14  | 0.10 | NA                | NA                       | NGS    |
| 3-015 | TP53   | chr17 | 7674220   | 7/11  | ENST00000269305.6:c.743G>A       | ENSP00000269305.4:p.Arg248Gln                                         | no  | yes | yes | B | yes | rs11540652,TP53_g.13380del,TP53_g.13380G>A,TP53_g.13380G>T,TP53_g.13380G>C,CM920675,COSM340107,COSM241996,COSM99021,COSM1646858,COSM1646857,COSM1640830,COSM3356964,COSM3378346,COSM340106,COSM241994,COSM99020,COSM340105,COSM241995,COSM99602,COSM11491,COSM46135,COSM10662,COSM6549 | 249  | 187  | 52  | 0.22 | deleterious(0)    | probably damaging(1)     | Sanger |
|       | TET2   | chr4  | 105272591 | 10/11 | ENST00000380013.6:c.4210C>T      | ENSP00000369351.4:p.Arg1404Ter                                        | no  | yes | no  | B | yes | COSM42037                                                                                                                                                                                                                                                                              | 88   | 76   | 11  | 0.13 | NA                | NA                       | NGS    |
|       | IDH2   | chr15 | 90088702  | 4/11  | ENST00000330062.5:c.419G>A       | ENSP00000331897.3:p.Arg140Gln                                         | yes | yes | yes | A | yes | rs121913502,COSM41875,COSM41590                                                                                                                                                                                                                                                        | 645  | 408  | 233 | 0.36 | deleterious(0)    | probably damaging(1)     | Sanger |
| 3-016 | IDH2   | chr15 | 90088702  | 4/11  | ENST00000330062.5:c.419G>A       | ENSP00000331897.3:p.Arg140Gln                                         | yes | yes | yes | A | yes | rs121913502,COSM41875,COSM41590                                                                                                                                                                                                                                                        | 945  | 519  | 425 | 0.45 | deleterious(0)    | probably damaging(1)     | Sanger |
| 3-017 | DNMT3A | chr2  | 25234373  | 23/23 | ENST00000321117.7:c.2645G>A      | ENSP00000324375.5:p.Arg882His                                         | yes | yes | yes | A | yes | rs147001633,COSM442676,COSM3356083,COSM1583129,COSM99740,COSM52944                                                                                                                                                                                                                     | 44   | 24   | 19  | 0.44 | deleterious(0.03) | probably damaging(0.993) | Sanger |
|       | FLT3   | chr13 | 28018505  | 20/24 | ENST00000241453.9:c.2503G>T      | ENSP00000241453.7:p.Asp835Tyr                                         | yes | yes | no  | A | yes | KinMutBase_FLT3_DNA:g.53109G>T,KinMutBase_FLT3_DNA:g.53109G>C,KinMutBase_FLT3_DNA:g.53109                                                                                                                                                                                              | 607  | 523  | 62  | 0.11 | deleterious(0)    | probably damaging(1)     | NGS    |



|       |        |       |           |       |                                    |                                       |     |     |     |   |     |                                                                    |      |      |      |      |                   |                          |        |
|-------|--------|-------|-----------|-------|------------------------------------|---------------------------------------|-----|-----|-----|---|-----|--------------------------------------------------------------------|------|------|------|------|-------------------|--------------------------|--------|
| 3-031 | FLT3   | chr13 | 28049450  | 8/24  | ENST00000241453.9:c.970G>A         | ENSP00000241453.7:p.Asp324Asn         | no  | yes | yes | B | no  | rs35602083,CM066823,COSM28040                                      | 2619 | 1353 | 1255 | 0.48 | tolerated(0.33)   | benign(0.035)            | Sanger |
|       | RUNX1  | chr21 | 34886881  | 3/8   | ENST00000300305.5:c.313C>A         | ENSP00000300305.3:p.His105Asn         | no  | no  | no  | C | no  | NA                                                                 | 593  | 6    | 584  | 0.99 | deleterious(0.01) | benign(0.363)            | Sanger |
| 3-032 | RUNX1  | chr21 | 34887027  | 3/8   | ENST00000300305.5:c.167T>C         | ENSP00000300305.3:p.Leu56Ser          | no  | yes | yes | B | no  | rs111527738,COSM24756                                              | 231  | 122  | 105  | 0.46 | tolerated(0.66)   | possibly damaging(0.812) | Sanger |
|       | NPM1   | chr5  | 171410542 | 12/12 | ENST00000517671.3:c.863_864insCCGG | ENSP00000428755.1:p.Trp288CysfsTer12  | yes | yes | no  | A | yes | COSM25117,COSM1319220,COSM20865,COSM1319219                        | 1433 | 1106 | 318  | 0.22 | NA                | NA                       | Sanger |
|       | CEBPA  | chr19 | 33301825  | 1/1   | ENST00000498907.2:c.584_589dup     | ENSP00000427514.1:p.His195_Pro196dup  | no  | no  | no  | C | no  | NA                                                                 | 227  | 188  | 32   | 0.14 | NA                | NA                       | NGS    |
| 3-034 | IDH1   | chr2  | 208248389 | 4/10  | ENST00000345146.4:c.394C>T         | ENSP00000260985.2:p.Arg132Cys         | yes | yes | yes | A | yes | COSM28749,COSM28747,COSM28748,rs121913499                          | 200  | 95   | 104  | 0.52 | deleterious(0.03) | possibly damaging(0.907) | Sanger |
|       | TET2   | chr4  | 105275662 | 11/11 | ENST00000380013.6:c.5152G>T        | ENSP00000369351.4:p.Val1718Leu        | no  | yes | yes | B | no  | rs142312318,COSM41742                                              | 65   | 30   | 35   | 0.54 | tolerated(0.34)   | benign(0.006)            | Sanger |
|       | NPM1   | chr5  | 171410539 | 12/12 | ENST00000517671.3:c.860_863dup     | ENSP00000428755.1:p.Trp288CysfsTer12  | yes | yes | no  | A | yes | COSM1319222,COSM255167,COSM46518,COSM158604                        | 2714 | 1699 | 1003 | 0.37 | NA                | NA                       | Sanger |
|       | CEBPA  | chr19 | 33302176  | 1/1   | ENST00000498907.2:c.238dup         | ENSP00000427514.1:p.Asp80GlyfsTer28   | no  | yes | no  | B | yes | COSM18618                                                          | 661  | 357  | 289  | 0.45 | NA                | NA                       | Sanger |
| 3-035 | IDH1   | chr2  | 208248389 | 4/10  | ENST00000345146.4:c.394C>A         | ENSP00000260985.2:p.Arg132Ser         | yes | yes | yes | A | yes | COSM28749,COSM28747,COSM28748,rs121913499                          | 98   | 30   | 67   | 0.69 | deleterious(0.03) | probably damaging(0.997) | Sanger |
|       | NPM1   | chr5  | 171410539 | 12/12 | ENST00000517671.3:c.860_863dup     | ENSP00000428755.1:p.Trp288CysfsTer12  | yes | yes | no  | A | yes | COSM1319222,COSM255167,COSM46518,COSM158604                        | 1571 | 996  | 561  | 0.36 | NA                | NA                       | Sanger |
|       | CEBPA  | chr19 | 33301984  | 1/1   | ENST00000498907.2:c.430dup         | ENSP00000427514.1:p.Glu144GlyfsTer26  | no  | no  | no  | C | yes | NA                                                                 | 211  | 79   | 103  | 0.57 | NA                | NA                       | Sanger |
| 3-037 | DNMT3A | chr2  | 25300227  | 3/23  | ENST00000321117.7:c.89A>C          | ENSP00000324375.5:p.Glu30Ala          | no  | yes | yes | B | no  | rs143730975,COSM307361                                             | 55   | 29   | 24   | 0.45 | deleterious(0)    | benign(0.292)            | Sanger |
|       | NPM1   | chr5  | 171410539 | 12/12 | ENST00000517671.3:c.860_863dup     | ENSP00000428755.1:p.Trp288CysfsTer12  | yes | yes | no  | A | yes | COSM1319222,COSM255167,COSM46518,COSM158604                        | 1422 | 943  | 472  | 0.33 | NA                | NA                       | Sanger |
|       | IDH2   | chr15 | 90088702  | 4/11  | ENST00000330062.5:c.419G>A         | ENSP00000331897.3:p.Arg140Gln         | yes | yes | yes | A | yes | rs121913502,COSM41875,COSM41590                                    | 923  | 506  | 407  | 0.45 | deleterious(0)    | probably damaging(1)     | Sanger |
| 3-038 | DNMT3A | chr2  | 25239194  | 20/23 | ENST00000321117.7:c.2340_2343del   | ENSP00000324375.5:p.Ile780MetfsTer21  | no  | no  | no  | C | yes | NA                                                                 | 111  | 83   | 26   | 0.24 | NA                | NA                       | Sanger |
|       | IDH2   | chr15 | 90088702  | 4/11  | ENST00000330062.5:c.419G>A         | ENSP00000331897.3:p.Arg140Gln         | yes | yes | yes | A | yes | rs121913502,COSM41875,COSM41590                                    | 1189 | 977  | 207  | 0.17 | deleterious(0)    | probably damaging(1)     | NGS    |
| 3-039 | FLT3   | chr13 | 28028243  | 16/24 | ENST00000241453.9:c.1988A>G        | ENSP00000241453.7:p.Lys663Arg         | no  | yes | no  | B | no  | COSM1366193                                                        | 1114 | 710  | 397  | 0.36 | deleterious(0)    | probably damaging(1)     | Sanger |
| 3-040 | DNMT3A | chr2  | 25246023  | 12/23 | ENST00000321117.7:c.1470dup        | ENSP00000324375.5:p.Glu491Ter         | no  | no  | no  | C | yes | NA                                                                 | 49   | 40   | 8    | 0.17 | NA                | NA                       | Sanger |
|       | IDH2   | chr15 | 90088606  | 4/11  | ENST00000330062.5:c.515G>A         | ENSP00000331897.3:p.Arg172Lys         | yes | yes | yes | A | yes | rs121913503,COSM1636997,COSM33733,COSM33732                        | 404  | 243  | 158  | 0.39 | deleterious(0)    | probably damaging(1)     | Sanger |
| 3-041 | DNMT3A | chr2  | 25234373  | 23/23 | ENST00000321117.7:c.2645G>A        | ENSP00000324375.5:p.Arg882His         | yes | yes | yes | A | yes | rs147001633,COSM442676,COSM3356083,COSM1583129,COSM99740,COSM52944 | 38   | 24   | 12   | 0.33 | deleterious(0.03) | probably damaging(0.993) | Sanger |
|       | NPM1   | chr5  | 171410539 | 12/12 | ENST00000517671.3:c.860_863dup     | ENSP00000428755.1:p.Trp288CysfsTer12  | yes | yes | no  | A | yes | COSM1319222,COSM255167,COSM46518,COSM158604                        | 830  | 562  | 267  | 0.32 | NA                | NA                       | Sanger |
| 3-042 | TET2   | chr4  | 105236554 | 3/11  | ENST00000380013.6:c.2613dup        | ENSP00000369351.4:p.Val872CysfsTer29  | no  | no  | no  | C | yes | NA                                                                 | 58   | 36   | 22   | 0.38 | NA                | NA                       | Sanger |
|       | TET2   | chr4  | 105269725 | 9/11  | ENST00000380013.6:c.4160A>G        | ENSP00000369351.4:p.Asn1387Ser        | no  | no  | no  | C | yes | NA                                                                 | 89   | 48   | 40   | 0.45 | deleterious(0)    | probably damaging(1)     | Sanger |
|       | TET2   | chr4  | 105272692 | 10/11 | ENST00000380013.6:c.4317dup        | ENSP00000369351.4:p.Arg1440ThrfsTer38 | no  | no  | no  | C | yes | NA                                                                 | 103  | 89   | 13   | 0.13 | NA                | NA                       | NGS    |
|       | ASXL1  | chr20 | 32434789  | 13/13 | ENST00000375687.6:c.2077C>T        | ENSP00000364839.4:p.Arg693Ter         | yes | yes | yes | A | yes | rs373221034,COSM51388                                              | 144  | 92   | 52   | 0.36 | NA                | NA                       | Sanger |
|       | CEBPA  | chr19 | 33302346  | 1/1   | ENST00000498907.2:c.68dup          | ENSP00000427514.1:p.His24AlafsTer84   | no  | yes | yes | B | yes | rs137852729,COSM18922,COSM29580                                    | 2818 | 1634 | 1187 | 0.42 | NA                | NA                       | Sanger |

<sup>1</sup> Position of the variant in the GRCh38 human genome.

<sup>2</sup> Exon location of the variant / total number of exons of the gene.

<sup>3</sup> HGVS<sub>c</sub>; coding sequence name as identified by the Human Genome Variation Society (<http://www.hgvs.org/>).

<sup>4</sup> HGVS<sub>p</sub>; protein sequence name as identified by the Human Genome Variation Society (<http://www.hgvs.org/>).

<sup>5</sup> HS; indicated whether the variant occurs in a hotspot (HS) region as identified in Table SVI.

<sup>6</sup> COS; indicated whether the variant is known as cancer mutation in COSMIC (catalogue of somatic mutations in cancer; <http://cancer.sanger.ac.uk/cosmic>).

- <sup>7</sup> SNP; indicated whether the variant is known as single nucleotide polymorphism in dbSNP (<https://www.ncbi.nlm.nih.gov/projects/SNP>).
- <sup>8</sup> Class; A, hotspot variant known in COSMIC (known or unknown as SNP); B, variant not in a hotspot but known in COSMIC (known or unknown as SNP); C, variant unknown in COSMIC and unknown as SNP; D, variant unknown in COSMIC and known as SNP.
- <sup>9</sup> Jaiswal; indicated whether the variant is a recurrent mutation in myeloid malignancies by Jaiswal *et al.* (NEJM 2017).
- <sup>10</sup> Existing variation; indicated is the identity of the variant as reported in COSMIC and dbSNP.
- <sup>11</sup> DP; Quality Read Depth of bases with Phred score  $\geq 15$ .
- <sup>12</sup> RD; depth of reference-supporting bases.
- <sup>13</sup> AD; depth of variant-supporting bases.
- <sup>14</sup> VAF; variant allele frequency.
- <sup>15</sup> SIFT; tool to predict the possible impact of an amino acid substitution on protein function (<http://sift.icvi.org/>).
- <sup>16</sup> PolyPhen; tool to predict the possible impact of an amino acid substitution on the structure and function of a human protein (<http://genetics.bwh.harvard.edu/pph2/>).
- <sup>17</sup> Validation; small variants were validated by RT-PCR followed by Sanger sequencing or MiSeq NGS. Primers used for validation are shown in Table SVIII.
- <sup>18</sup> Targeted re-sequencing showed that these variants are located on the same allele.

**Table SVIII. Primers used for validation of small variants<sup>1</sup>.**

| Primer                 | Sequence (5'- 3')                                      | ENST transcript | Position        |                 | Size (bp) |
|------------------------|--------------------------------------------------------|-----------------|-----------------|-----------------|-----------|
|                        |                                                        |                 | start (cds)     | stop (cds)      |           |
| ASXL1-1F<br>ASXL1-1R   | GGTGGTTAAAGGTCAGCCCA<br>AGCCCATCTGTGAGTCCAAC           | ENST00000375687 | 1749<br>2228    | 1768<br>2209    | 480       |
| ASXL1-2F<br>ASXL1-2R   | CCTGCAGACAATGGTCCCAT<br>TCAGAGGCTGTATCCGTGGA           | ENST00000375687 | 2422<br>3011    | 2441<br>2992    | 590       |
| ASXL1-3F<br>ASXL1-3R   | GTCCGCCAAAAGATCCCAGA<br>TGTCTGCTCTGGACCAAGG            | ENST00000375687 | 3214<br>3861    | 3233<br>3842    | 648       |
| CEBPA-1F<br>CEBPA-1R   | CCATGCCGGGAGAAGTCTAA<br>CCTTGGCCTTCTCCTGCTG            | ENST00000498907 | -26<br>277      | -7<br>259       | 304       |
| CEBPA-2F<br>CEBPA-2R   | CGACTTCTACGAGGCGGAG<br>GGCTCCTGCTTGATCACCAG            | ENST00000498907 | 12<br>491       | 30<br>472       | 480       |
| CEBPA-3F<br>CEBPA-3R   | CCGATGAGCAGCCACCTG<br>TCGTACAGGGGCTCCAGC               | ENST00000498907 | 40<br>443       | 47<br>426       | 404       |
| CEBPA-4F<br>CEBPA-4R   | CCGCTACCTGGACGGCAG<br>GCAGGTGCATGGTGGTCT               | ENST00000498907 | 408<br>661      | 425<br>644      | 254       |
| CEBPA-5F<br>CEBPA-5R   | AGGAGGATGAAGCCAAGCAG<br>CTTGACCAAGGAGCTCTCTGG          | ENST00000498907 | 497<br>1056     | 516<br>1036     | 560       |
| CEBPA-6F<br>CEBPA-6R   | AGAACAGCAACGAGTACCGG<br>CCAAACCACTCCCTGGGTC            | ENST00000498907 | 989<br>1288     | 1008<br>1270    | 300       |
| CEBPA-7F<br>CEBPA-7R   | AGCGCCGCCTTCGGCTTT<br>CCCGGGTAGTCAAAGTCGCCG            | ENST00000498907 | 82<br>329       | 99<br>309       | 248       |
| CEBPA-8F<br>CEBPA-8R   | CGGTGGACAAGAAGCAGCAACG<br>CAGGCCAGGCTTTCAGGAGG         | ENST00000498907 | 830<br>1077*140 | 850<br>1077*120 | 388       |
| DNMT3A-1F<br>DNMT3A-1R | ATTCTTCCCCAAAGCCCAG<br>GGGTCCTTTGGCGTGCA               | ENST00000321117 | -65<br>206      | -46<br>189      | 272       |
| DNMT3A-2F<br>DNMT3A-2R | AAGCCAAGGTCATTGCAGGA<br>GTACTCTGGCTCGTCATCGC           | ENST00000321117 | 650<br>852      | 669<br>833      | 203       |
| DNMT3A-3F<br>DNMT3A-3R | GGAGAAGCCCAAGGTCAAGG<br>CCGTGATGGAGTCTCACAC            | ENST00000321117 | 1386<br>2014    | 1405<br>1995    | 629       |
| DNMT3A-4F<br>DNMT3A-4R | GACTTGGGCATTTCAGGTGGA<br>CCATGCTCCAGACACTCCTG          | ENST00000321117 | 1954<br>2465    | 1973<br>2446    | 512       |
| DNMT3A-5F<br>DNMT3A-5R | CGCGATTTCTCGAGTCCAAC<br>CATGTCCCTTACACACACGCA          | ENST00000321117 | 2309<br>2747    | 2328<br>2727    | 439       |
| FLT3-1F<br>FLT3-1R     | ACAGTGAGTATAAGAAATACCCTGCT<br>TCTTCACTTGAATTGGTAGCATTT | ENST00000241453 | 469<br>1073     | 494<br>1050     | 604       |
| FLT3-2F<br>FLT3-2R     | TGCAGAAAATGATGATGCCCA<br>AAGCTGTTGCGTTCATCACTT         | ENST00000241453 | 1257<br>1888    | 1277<br>1868    | 632       |
| FLT3-3F<br>FLT3-3R     | ACTAGGATCAGGTGCTTTTGGGA<br>GAGAAGATCACCATAGCAACAGT     | ENST00000241453 | 1845<br>2100    | 1866<br>2078    | 256       |
| FLT3-4F<br>FLT3-4R     | TGTGTTACAGAGACCTGGC<br>AACCGGAATGCCAGGGTAAG            | ENST00000241453 | 2419<br>2682    | 2438<br>2663    | 264       |
| FLT3-5F<br>FLT3-2R     | TTGGTGTTTGTCTCCTCTTCA<br>AAGCTGTTGCGTTCATCACTT         | ENST00000241453 | 1643<br>1888    | 1663<br>1868    | 246       |
| IDH1-1F<br>IDH1-1R     | TGGGAGGAACTGGGGTGATA<br>GGCACATTTGACGCCAACAT           | ENST00000345146 | -56<br>222      | -37<br>203      | 279       |
| IDH1-2F<br>IDH1-2R     | GTGGCACGGTCTTCAGAGAA<br>GCCAACCCCTTAGACAGAGCC          | ENST00000345146 | 311<br>616      | 330<br>597      | 306       |
| IDH2-1F<br>IDH2-1R     | GGCCACCCAGAAGTACAGTG<br>GACTTGAGGACCTGAGCCAC           | ENST00000330062 | 306<br>899      | 325<br>880      | 594       |
| IDH2-2F<br>IDH2-2R     | AGATGCTGGAGAAGGTGTGC<br>ATCCCCTAGAAAGGCCTCCA           | ENST00000330062 | 1187<br>1473    | 1206<br>1454    | 287       |
| IDH2-1F<br>IDH2-3R     | GGCCACCCAGAAGTACAGTG<br>CCAATGGTGATGGGCTTGGT           | ENST00000330062 | 306<br>512      | 325<br>493      | 207       |
| KIT-1F<br>KIT-1R       | GCTGCACTTGGGCGAGAG<br>AAAGCCCAGATCAGTGCATA             | ENST00000288135 | -60<br>189      | -43<br>170      | 250       |
| KIT-2F<br>KIT-2R       | CCATCTGTGAGTCCAGGGGA<br>GCTTCTGCCTTTTCCGTGATC          | ENST00000288135 | 79<br>266       | 98<br>246       | 188       |
| KIT-3F                 | ACGAGATTAAGGACCCGA                                     | ENST00000288135 | 1138            | 1157            | 235       |

|          |                             |                 |      |      |     |
|----------|-----------------------------|-----------------|------|------|-----|
| KIT-3R   | CCACTGGCAGTACAGAAGCA        |                 | 1372 | 1353 |     |
| KIT-4F   | ACCGTTTGGAAAGCTAGTGGT       | ENST00000288135 | 1401 | 1421 | 287 |
| KIT-4R   | TCTCCTCAACAACCTTCCACTG      |                 | 1687 | 1666 |     |
| KIT-5F   | TCTTACCAGGTGGCAAAGGG        | ENST00000288135 | 2317 | 2336 | 253 |
| KIT-5R   | TCCCATAGGACCAGACGTCA        |                 | 2569 | 2550 |     |
| NRAS-1F  | ACATTTTTCCCGGCTGTGGT        | ENST00000369535 | -73  | -54  | 360 |
| NRAS-1R  | AGAGGTTAATATCCGCAAATGACT    |                 | 286  | 263  |     |
| NRAS-2F  | CCTCAGCCAAGACCAGACAG        | ENST00000369535 | 431  | 450  | 185 |
| NRAS-2R  | AGCTTGAAAGTGGCTCTTTTCTG     |                 | 615  | 593  |     |
| RUNX1-1F | CTAGAGACGTCCACGATGCC        | ENST00000300305 | 83   | 102  | 611 |
| RUNX1-1R | CAGCTGCTCCAGTTCACTGA        |                 | 693  | 674  |     |
| RUNX1-2F | CAGATCCAACCATCCCCACC        | ENST00000300305 | 814  | 833  | 630 |
| RUNX1-2R | TCAGTAGGGCCTCCACACG         |                 | 1443 | 1425 |     |
| TET2-1F  | ACCAACCATGTTGAGGGCAA        | ENST00000380013 | 16   | 35   | 507 |
| TET2-1R  | AGGCCCACTGCAGTTATGTG        |                 | 522  | 503  |     |
| TET2-2F  | ACAAGGCAGTGCTAATGCCT        | ENST00000380013 | 605  | 624  | 508 |
| TET2-2R  | AAATACCCTTCAGAGTGCCA        |                 | 1112 | 1092 |     |
| TET2-3F  | GCCAGTAAACTAGCTGCAATGC      | ENST00000380013 | 910  | 931  | 286 |
| TET2-3R  | GTGGTGTGGTAGTGGCAGAA        |                 | 1195 | 1176 |     |
| TET2-4F  | CCCCAACACAGCACTATCT         | ENST00000380013 | 1660 | 1679 | 476 |
| TET2-4R  | GGCTCAGTCTCTGAAGCCTG        |                 | 2135 | 2116 |     |
| TET2-5F  | GTCAGACCATGAAATCAAGTGCA     | ENST00000380013 | 2459 | 2481 | 442 |
| TET2-5R  | TGCTGTGTTTGCTGCTGTTC        |                 | 2900 | 2881 |     |
| TET2-6F  | AGTTGAAATGTCAGGGCCAGT       | ENST00000380013 | 3165 | 3185 | 180 |
| TET2-6R  | GGAGTATCTAGTAATTTGGAAGGTGAC |                 | 3344 | 3318 |     |
| TET2-7F  | CGCTGTCTCTGGCTGACAAA        | ENST00000380013 | 3710 | 3729 | 386 |
| TET2-7R  | GCCTTCCTTCAGACCCAGAC        |                 | 4095 | 4076 |     |
| TET2-8F  | GTCTGGGTCTGAAGGAAGGC        | ENST00000380013 | 4076 | 4095 | 423 |
| TET2-8R  | TTGTACGTGATGGGGCTGAC        |                 | 4498 | 4479 |     |
| TET2-9F  | GCTCAGTCTACCACCCATCC        | ENST00000380013 | 5007 | 5026 | 235 |
| TET2-9R  | TGGATTGCTCAGATTGGGTGG       |                 | 5241 | 5221 |     |
| TET2-10F | GGTGCAGAGGACAACGATGA        | ENST00000380013 | 5515 | 5534 | 412 |
| TET2-10R | TGGTCCTTTTCGGCAAGAGAC       |                 | 5926 | 5907 |     |
| TP53-1F  | GCCCCTCCTCAGCATCTTATC       | ENST00000269305 | 565  | 585  | 261 |
| TP53-1R  | ACAAACACGCACCTCAAAGC        |                 | 825  | 806  |     |
| WT1-1F   | TGTCGCTACGGGCCCTTC          | ENST00000332351 | 523  | 540  | 226 |
| WT1-1R   | TGGGATCCTCATGCTTGAATGA      |                 | 748  | 727  |     |
| WT1-2F   | CACAGCACAGGGTACGAGAG        | ENST00000332351 | 1003 | 1022 | 517 |
| WT1-2R   | GATGCATGTTGTGATGCGCG        |                 | 1519 | 1500 |     |

<sup>1</sup> PCR was performed for 33 cycles using PWO SuperYield DNA polymerase or Phusion Flash High-Fidelity PCR Master Mix.

**Table SIX. Definition of hotspot regions<sup>1</sup>.**

| <b>Gene</b>   | <b>ENST transcript</b> | <b>Hotspot</b> | <b>CDS position</b> | <b>Type of mutations</b>                         |
|---------------|------------------------|----------------|---------------------|--------------------------------------------------|
| <b>NPM1</b>   | ENST00000517671        | exon 11-12     | 772-885             | 4 bp frameshift insertions                       |
| <b>DNMT3A</b> | ENST00000321117        | exon 23        | 2644-2645           | missense SNVs                                    |
| <b>FLT3</b>   | ENST00000241453        | exon 14-15     | 1705-1942           | 3-300 bp in-frame insertions (ITD <sup>2</sup> ) |
|               |                        | exon 20        | 2503-2505           | missense SNVs (TKD <sup>3</sup> )                |
| <b>ASXL1</b>  | ENST00000375687        | exon 13        | 1720-4626           | coding SNV and small indels                      |
| <b>IDH1</b>   | ENST00000345146        | exon 4         | 394-395             | missense SNVs                                    |
| <b>IDH2</b>   | ENST00000330062        | exon 4         | 374-534             | missense SNVs                                    |
| <b>KIT</b>    | ENST00000288135        | exon 8         | 1248-1258           | in-frame indels                                  |
|               |                        | exon 17        | 2446-2447           | missense SNVs                                    |
| <b>NRAS</b>   | ENST00000369535        | exon 2         | 34-38               | missense SNVs                                    |
|               |                        | exon 3         | 181-183             | missense SNVs                                    |

<sup>1</sup> Hotspot regions are defined by positions in the coding sequence with a mutation frequency according to COSMIC.

<sup>2</sup> ITD; internal tandem duplications

<sup>3</sup> TKD; tyrosine kinase domain

**Table SX. Validation of RNAseq-HAMLET by targeted NGS on genomic DNA from 50 selected AML cases<sup>1</sup>.**

| AML   | Gene   | Chrom | GRCh38 <sup>2</sup> | Exon <sup>3</sup> | HGVSc <sup>4</sup>               | HGVSp <sup>5</sup>                    | HS <sup>6</sup> | Cos <sup>7</sup> | SNP <sup>8</sup> | Class <sup>9</sup> | Jaiswal <sup>10</sup> | RNAseq-HAMLET | GenDNA-NGS   |
|-------|--------|-------|---------------------|-------------------|----------------------------------|---------------------------------------|-----------------|------------------|------------------|--------------------|-----------------------|---------------|--------------|
| 1-003 | DNMT3A | chr2  | 25234374            | 23/23             | ENST00000321117.7:c.2644C>T      | ENSP00000324375.5.p.Arg882Cys         | yes             | yes              | yes              | A                  | yes                   | +             | +            |
|       | TET2   | chr4  | 105261793           | 8/11              | ENST00000380013.6:c.3989C>A      | ENSP00000369351.4.p.Ser1330Tyr        | no              | no               | no               | C                  | yes                   | +             | +            |
| 1-006 | DNMT3A | chr2  | 25234373            | 23/23             | ENST00000321117.7:c.2645G>A      | ENSP00000324375.5.p.Arg882His         | yes             | yes              | yes              | A                  | yes                   | +             | +            |
| 1-008 | KIT    | chr4  | 54695617            | 2/21              | ENST00000288135.5:c.173G>T       | ENSP00000288135.5.p.Cys58Phe          | no              | no               | no               | C                  | no                    | +             | +            |
|       | KIT    | chr4  | 54733155            | 17/21             | ENST00000288135.5:c.2447A>T      | ENSP00000288135.5.p.Asp816Val         | yes             | yes              | yes              | A                  | yes                   | +             | +            |
|       | RUNX1  | chr21 | 34792416            | 8/8               | ENST00000300305.5:c.1161del      | ENSP00000300305.3.p.Ser388ArgfsTer206 | no              | no               | yes              | D                  | yes                   | +             | +            |
| 2-002 | DNMT3A | chr2  | 25244579            | 14/23             | ENST00000321117.7:c.1628G>T      | ENSP00000324375.5.p.Gly543Val         | no              | yes              | no               | B                  | no                    | +             | +            |
|       | RUNX1  | chr21 | 34834566            | 6/8               | ENST00000300305.5:c.649G>A       | ENSP00000300305.3.p.Gly217Arg         | no              | no               | no               | C                  | no                    | +             | +            |
|       | TET2   | chr4  | 105235712           | 3/11              | ENST00000380013.6:c.1771del      | ENSP00000369351.4.p.Gln591SerfsTer10  | no              | no               | no               | C                  | yes                   | +             | +            |
|       | TET2   | chr4  | 105272773           | 10/11             | ENST00000380013.6:c.4392C>A      | ENSP00000369351.4.p.Cys1464Ter        | no              | yes              | no               | B                  | yes                   | +             | +            |
| 2-006 | TET2   | chr4  | 105237193           | 3/11              | ENST00000380013.6:c.3251A>C      | ENSP00000369351.4.p.Gln1084Pro        | no              | no               | yes              | D                  | no                    | +             | +            |
| 2-010 | TET2   | chr4  | 105275662           | 11/11             | ENST00000380013.6:c.5152G>T      | ENSP00000369351.4.p.Val1718Leu        | no              | yes              | yes              | B                  | no                    | +             | +            |
| 2-011 | IDH1   | chr2  | 208248388           | 4/10              | ENST00000345146.4:c.395G>A       | ENSP00000260985.2.p.Arg132His         | yes             | yes              | yes              | A                  | yes                   | +             | +            |
| 2-014 | KIT    | chr4  | 54658066            | 1/21              | ENST00000288135.5:c.52C>T        | ENSP00000288135.5.p.Leu18Phe          | no              | no               | yes              | D                  | no                    | +             | +            |
| 2-016 | DNMT3A | chr2  | 25244580            | 14/23             | ENST00000321117.7:c.1627G>T      | ENSP00000324375.5.p.Gly543Cys         | no              | yes              | no               | B                  | no                    | +             | +            |
|       | TET2   | chr4  | 105234042           | 3/11              | ENST00000380013.6:c.100C>T       | ENSP00000369351.4.p.Leu34Phe          | no              | no               | yes              | D                  | no                    | +             | +            |
| 2-019 | TP53   | chr17 | 7674885             | 6/11              | ENST00000269305.6:c.646G>A       | ENSP00000269305.4.p.Val216Met         | no              | yes              | no               | B                  | yes                   | +             | +            |
| 2-023 | DNMT3A | chr2  | 25240672            | 18/23             | ENST00000321117.7:c.2141C>G      | ENSP00000324375.5.p.Ser714Cys         | no              | yes              | yes              | B                  | yes                   | +             | +            |
|       | RUNX1  | chr21 | 34792223            | 8/8               | ENST00000300305.5:c.1342_1354dup | ENSP00000300305.3.p.Val452GlufsTer152 | no              | no               | no               | C                  | yes                   | +             | +            |
| 2-024 | DNMT3A | chr2  | 25240666            | 18/23             | ENST00000321117.7:c.2147T>A      | ENSP00000324375.5.p.Val716Asp         | no              | yes              | no               | B                  | yes                   | +             | +            |
|       | TET2   | chr4  | 105275613           | 11/11             | ENST00000380013.6:c.5103G>A      | ENSP00000369351.4.p.Met1701Ile        | no              | no               | yes              | D                  | no                    | +             | +            |
| 2-027 | IDH1   | chr2  | 208248389           | 4/10              | ENST00000345146.4:c.394C>T       | ENSP00000260985.2.p.Arg132Cys         | yes             | yes              | yes              | A                  | yes                   | +             | +            |
| 2-028 | TET2   | chr4  | 105234350           | 3/11              | ENST00000380013.6:c.409del       | ENSP00000369351.4.p.Ser137ValfsTer8   | no              | no               | no               | C                  | yes                   | +             | +            |
|       | TET2   | chr4  | 105236721           | 3/11              | ENST00000380013.6:c.2784del      | ENSP00000369351.4.p.Pro929LeufsTer24  | no              | no               | no               | C                  | yes                   | +             | +            |
| 2-029 | DNMT3A | chr2  | 25234367            | 23/23             | ENST00000321117.7:c.2651C>T      | ENSP00000324375.5.p.Ala884Val         | no              | yes              | no               | B                  | yes                   | +             | +            |
|       | IDH1   | chr2  | 208245342           | 5/10              | ENST00000345146.4:c.497C>T       | ENSP00000260985.2.p.Thr166Ile         | no              | no               | no               | C                  | no                    | +             | +            |
| 2-030 | DNMT3A | chr2  | 25243931            | 16/23             | ENST00000321117.7:c.1903C>T      | ENSP00000324375.5.p.Arg635Trp         | no              | yes              | yes              | B                  | yes                   | +             | +            |
| 2-033 | TET2   | chr4  | 105234647           | 3/11              | ENST00000380013.6:c.706del       | ENSP00000369351.4.p.Asp236IlefsTer14  | no              | no               | no               | C                  | yes                   | +             | +            |
|       | TET2   | chr4  | 105275653           | 11/11             | ENST00000380013.6:c.5145_5151del | ENSP00000369351.4.p.His1716Ter        | no              | no               | no               | C                  | yes                   | +             | +            |
| 2-036 | DNMT3A | chr2  | 25234373            | 23/23             | ENST00000321117.7:c.2645G>C      | ENSP00000324375.5.p.Arg882Pro         | yes             | yes              | yes              | A                  | yes                   | +             | +            |
| 2-037 | RUNX1  | chr21 | 34859495            | 5/8               | ENST00000300305.5:c.592G>A       | ENSP00000300305.3.p.Asp198Asn         | no              | yes              | no               | B                  | no                    | +             | +            |
| 2-038 | RUNX1  | chr21 | 34886865            | 3/8               | ENST00000300305.5:c.329A>G       | ENSP00000300305.3.p.Lys110Arg         | no              | yes              | no               | B                  | no                    | -             | + (VAF 0.10) |
| 2-039 | RUNX1  | chr21 | 34886865            | 3/8               | ENST00000300305.5:c.329A>G       | ENSP00000300305.3.p.Lys110Arg         | no              | yes              | no               | B                  | no                    | +             | +            |
|       | IDH1   | chr2  | 208239941           | 8/10              | ENST00000345146.4:c.913G>A       | ENSP00000260985.2.p.Ala305Thr         | no              | no               | yes              | D                  | no                    | -             | + (VAF 0.43) |



|       |        |       |           |       |                                  |                                       |     |     |     |   |     |              |   |
|-------|--------|-------|-----------|-------|----------------------------------|---------------------------------------|-----|-----|-----|---|-----|--------------|---|
| 2-040 | DNMT3A | chr2  | 25234373  | 23/23 | ENST00000321117.7:c.2645G>C      | ENSP00000324375.5.p.Arg882Pro         | yes | yes | yes | A | yes | +            | + |
| 2-041 | DNMT3A | chr2  | 25234374  | 23/23 | ENST00000321117.7:c.2644C>T      | ENSP00000324375.5.p.Arg882Cys         | yes | yes | yes | A | yes | +            | + |
|       | TET2   | chr4  | 105234995 | 3/11  | ENST00000380013.6:c.1055del      | ENSP00000369351.4.p.Phe352SerfsTer20  | no  | no  | no  | C | yes | +            | + |
| 2-048 | DNMT3A | chr2  | 25234373  | 23/23 | ENST00000321117.7:c.2645G>A      | ENSP00000324375.5.p.Arg882His         | yes | yes | yes | A | yes | +            | + |
| 2-049 | DNMT3A | chr2  | 25234373  | 23/23 | ENST00000321117.7:c.2645G>C      | ENSP00000324375.5.p.Arg882Pro         | yes | yes | yes | A | yes | +            | + |
| 2-050 | RUNX1  | chr21 | 34886866  | 3/8   | ENST00000300305.5:c.328A>C       | ENSP00000300305.3.p.Lys110Gln         | no  | no  | yes | D | no  | +            | + |
|       | TET2   | chr4  | 105272692 | 10/11 | ENST00000380013.6:c.4317dup      | ENSP00000369351.4.p.Arg1440ThrfsTer38 | no  | no  | no  | C | yes | + (VAF 0.39) | - |
| 3-005 | DNMT3A | chr2  | 25234373  | 23/23 | ENST00000321117.7:c.2645G>A      | ENSP00000324375.5.p.Arg882His         | yes | yes | yes | A | yes | +            | + |
|       | TET2   | chr4  | 105234042 | 3/11  | ENST00000380013.6:c.100C>T       | ENSP00000369351.4.p.Leu34Phe          | no  | no  | yes | D | no  | +            | + |
|       | TET2   | chr4  | 105236491 | 3/11  | ENST00000380013.6:c.2549A>G      | ENSP00000369351.4.p.His850Arg         | no  | no  | yes | D | no  | +            | + |
| 3-006 | DNMT3A | chr2  | 25245284  | 13/23 | ENST00000321117.7:c.1522del      | ENSP00000324375.5.p.Leu508SerfsTer143 | no  | no  | no  | C | yes | +            | + |
|       | IDH1   | chr2  | 208243577 | 6/10  | ENST00000345146.4:c.548A>G       | ENSP00000260985.2.p.Tyr183Cys         | no  | no  | yes | D | no  | +            | + |
|       | RUNX1  | chr21 | 34792566  | 8/8   | ENST00000300305.5:c.1011dup      | ENSP00000300305.3.p.Ala338ArgfsTer262 | no  | yes | no  | B | yes | +            | + |
| 3-007 | KIT    | chr4  | 54733155  | 17/21 | ENST00000288135.5:c.2447A>T      | ENSP00000288135.5.p.Asp816Val         | yes | yes | yes | A | yes | +            | + |
|       | TET2   | chr4  | 105272692 | 10/11 | ENST00000380013.6:c.4317dup      | ENSP00000369351.4.p.Arg1440ThrfsTer38 | no  | no  | no  | C | yes | + (VAF 0.12) | - |
| 3-009 | DNMT3A | chr2  | 25240313  | 19/23 | ENST00000321117.7:c.2311C>T      | ENSP00000324375.5.p.Arg771Ter         | no  | yes | no  | B | yes | +            | + |
|       | IDH1   | chr2  | 208248389 | 4/10  | ENST00000345146.4:c.394C>G       | ENSP00000260985.2.p.Arg132Gly         | yes | yes | yes | A | yes | +            | + |
| 3-012 | DNMT3A | chr2  | 25234374  | 23/23 | ENST00000321117.7:c.2644C>A      | ENSP00000324375.5.p.Arg882Ser         | yes | yes | yes | A | no  | +            | + |
| 3-013 | IDH1   | chr2  | 208243532 | 6/10  | ENST00000345146.4:c.593A>G       | ENSP00000260985.2.p.Gln198Arg         | no  | no  | yes | D | no  | +            | + |
|       | TET2   | chr4  | 105235995 | 3/11  | ENST00000380013.6:c.2053C>T      | ENSP00000369351.4.p.Gln685Ter         | no  | no  | no  | C | yes | +            | + |
| 3-015 | TP53   | chr17 | 7674220   | 7/11  | ENST00000269305.6:c.743G>A       | ENSP00000269305.4.p.Arg248Gln         | no  | yes | yes | B | yes | +            | + |
|       | TET2   | chr4  | 105272591 | 10/11 | ENST00000380013.6:c.4210C>T      | ENSP00000369351.4.p.Arg1404Ter        | no  | yes | no  | B | yes | +            | + |
| 3-017 | DNMT3A | chr2  | 25234373  | 23/23 | ENST00000321117.7:c.2645G>A      | ENSP00000324375.5.p.Arg882His         | yes | yes | yes | A | yes | +            | + |
|       | IDH1   | chr2  | 208251458 | 3/10  | ENST00000345146.4:c.94T>G        | ENSP00000260985.2.p.Phe32Val          | no  | yes | yes | B | no  | +            | + |
|       | RUNX1  | chr21 | 34792448  | 8/8   | ENST00000300305.5:c.1129dup      | ENSP00000300305.3.p.Tyr377LeufsTer223 | no  | no  | no  | C | yes | +            | + |
|       | TET2   | chr4  | 105234763 | 3/11  | ENST00000380013.6:c.822del       | ENSP00000369351.4.p.Asn275IlefsTer18  | no  | yes | no  | B | Yes | +            | + |
|       | TET2   | chr4  | 105259626 | 7/11  | ENST00000380013.6:c.3812dup      | ENSP00000369351.4.p.Cys1271TrpfsTer29 | no  | yes | no  | B | yes | +            | + |
| 3-023 | TET2   | chr4  | 105261769 | 8/11  | ENST00000380013.6:c.3965T>G      | ENSP00000369351.4.p.Leu1322Arg        | no  | yes | no  | B | yes | +            | + |
| 3-024 | TP53   | chr17 | 7674259   | 7/11  | ENST00000269305.6:c.704A>G       | ENSP00000269305.4.p.Asn235Ser         | no  | yes | yes | B | no  | +            | + |
| 3-034 | IDH1   | chr2  | 208248389 | 4/10  | ENST00000345146.4:c.394C>T       | ENSP00000260985.2.p.Arg132Cys         | yes | yes | yes | A | yes | +            | + |
|       | TET2   | chr4  | 105275662 | 11/11 | ENST00000380013.6:c.5152G>T      | ENSP00000369351.4.p.Val1718Leu        | no  | yes | yes | B | no  | +            | + |
| 3-038 | DNMT3A | chr2  | 25239194  | 20/23 | ENST00000321117.7:c.2340_2343del | ENSP00000324375.5.p.Ile780MetfsTer21  | no  | no  | no  | C | yes | +            | + |
| 3-042 | TET2   | chr4  | 105236554 | 3/11  | ENST00000380013.6:c.2613dup      | ENSP00000369351.4.p.Val872CysfsTer29  | no  | no  | no  | C | yes | +            | + |
|       | TET2   | chr4  | 105269725 | 9/11  | ENST00000380013.6:c.4160A>G      | ENSP00000369351.4.p.Asn1387Ser        | no  | no  | no  | C | yes | +            | + |
|       | TET2   | chr4  | 105272692 | 10/11 | ENST00000380013.6:c.4317dup      | ENSP00000369351.4.p.Arg1440ThrfsTer38 | no  | no  | no  | C | yes | + (VAF 0.13) | - |

<sup>1</sup> Targeted NGS has been performed on genomic DNA from 50 AML cases for protein coding regions of *RUNX1* (8 exons), *TP53* (11 exons), *TET2* (11 exons), *KIT1* (21 exons) and *IDH1* (8 exons) as well as a large part of the protein coding region of *DNMT3A* (exons 13-23). Results are shown for AML

cases in which variants were detected by HAMLET or targeted NGS. AML cases in which no variants were detected by both HAMLET and targeted NGS are not shown. *DNMT3A* variants that were detected by HAMLET outside exons 13-23 are not covered by targeted NGS and excluded from the analysis. In addition, a limited number of *RUNX1* variants that were detected by HAMLET in 20-30 bp regions between amplicons that were not covered by targeted NGS were excluded. Variants that were detected by HAMLET or targeted NGS are shown in blue (+). Variants that were not detected by HAMLET or targeted NGS are shown in orange (-). Variants indicated in yellow are nonsense variants or frameshift variants with a premature stop codon that are potential targets for nonsense mediated decay.

<sup>2</sup> Position of the variant in the GRCh38 human genome.

<sup>3</sup> Exon location of the variant / total number of exons of the gene.

<sup>4</sup> HGVS<sub>c</sub>; coding sequence name as identified by the Human Genome Variation Society (<http://www.hgvs.org/>).

<sup>5</sup> HGVS<sub>p</sub>; protein sequence name as identified by the Human Genome Variation Society (<http://www.hgvs.org/>).

<sup>6</sup> HS; indicated whether the variant occurs in a hotspot (HS) region as identified in Table SVI.

<sup>7</sup> COS; indicated whether the variant is known as cancer mutation in COSMIC (catalogue of somatic mutations in cancer; <http://cancer.sanger.ac.uk/cosmic>).

<sup>8</sup> SNP; indicated whether the variant is known as single nucleotide polymorphism in dbSNP (<https://www.ncbi.nlm.nih.gov/projects/SNP>).

<sup>9</sup> Class; A, hotspot variant known in COSMIC (known or unknown as SNP); B, variant not in a hotspot but known in COSMIC (known or unknown as SNP); C, variant unknown in COSMIC and unknown as SNP; D, variant unknown in COSMIC and known as SNP.

<sup>10</sup> Jaiswal; indicated whether the variant is a recurrent mutation in myeloid malignancies by Jaiswal *et al.* (NEJM 2017).

**Table SXI. Sensitivity of HAMLET to detect small variants at different sequencing depths<sup>1</sup>.**

| AML   | Gene   | Chrom | GRCh38 <sup>2</sup> | Exon <sup>3</sup> | HGVSc <sup>4</sup>                 | HGVSp <sup>5</sup>                    | HS <sup>6</sup> | Cos <sup>7</sup> | SNP <sup>8</sup> | Class <sup>9</sup> | Jaiswal <sup>10</sup> | 20M | 30M  | 40M  | 47.5M |
|-------|--------|-------|---------------------|-------------------|------------------------------------|---------------------------------------|-----------------|------------------|------------------|--------------------|-----------------------|-----|------|------|-------|
| 1-001 | NRAS   | chr1  | 114716123           | 2/7               | ENST00000369535.4:c.38G>A          | ENSP00000358548.4:p.Gly13Asp          | yes             | yes              | no               | A                  | yes                   | +   | n.d. | n.d. | n.d.  |
| 1-002 | DNMT3A | chr2  | 25234373            | 23/23             | ENST00000321117.7:c.2645G>A        | ENSP00000324375.5:p.Arg882His         | yes             | yes              | yes              | A                  | yes                   | +   | n.d. | n.d. | n.d.  |
|       | FLT3   | chr13 | 28018505            | 20/24             | ENST00000241453.9:c.2503G>C        | ENSP00000241453.7:p.Asp835His         | yes             | yes              | no               | A                  | yes                   | +   | n.d. | n.d. | n.d.  |
|       | FLT3   | chr13 | 28052579            | 5/24              | ENST00000241453.9:c.580G>A         | ENSP00000241453.7:p.Val194Met         | no              | yes              | yes              | B                  | no                    | +   | n.d. | n.d. | n.d.  |
|       | IDH1   | chr2  | 208243577           | 6/10              | ENST00000345146.4:c.548A>G         | ENSP00000260985.2:p.Tyr183Cys         | no              | no               | yes              | D                  | no                    | +   | n.d. | n.d. | n.d.  |
|       | TET2   | chr4  | 105236781           | 3/11              | ENST00000380013.6:c.2839C>T        | ENSP00000369351.4:p.Gln947Ter         | no              | yes              | no               | B                  | yes                   | -   | -    | -    | +     |
|       | TET2   | chr4  | 105276128           | 11/11             | ENST00000380013.6:c.5618T>C        | ENSP00000369351.4:p.Ile1873Thr        | no              | yes              | yes              | B                  | yes                   | +   | n.d. | n.d. | n.d.  |
|       | NPM1   | chr5  | 171410539           | 12/12             | ENST00000517671.3:c.860_863dup     | ENSP00000428755.1:p.Trp288CysfsTer12  | yes             | yes              | no               | A                  | yes                   | +   | n.d. | n.d. | n.d.  |
| 1-003 | DNMT3A | chr2  | 25234374            | 23/23             | ENST00000321117.7:c.2644C>T        | ENSP00000324375.5:p.Arg882Cys         | yes             | yes              | yes              | A                  | yes                   | +   | n.d. | n.d. | n.d.  |
|       | TET2   | chr4  | 105261793           | 8/11              | ENST00000380013.6:c.3989C>A        | ENSP00000369351.4:p.Ser1330Tyr        | no              | no               | no               | C                  | yes                   | +   | n.d. | n.d. | n.d.  |
|       | NPM1   | chr5  | 171410540           | 12/12             | ENST00000517671.3:c.863_864insCCTG | ENSP00000428755.1:p.Trp288CysfsTer12  | yes             | yes              | no               | A                  | yes                   | +   | n.d. | n.d. | n.d.  |
| 1-004 | KIT    | chr4  | 54733155            | 17/21             | ENST00000288135.5:c.2447A>T        | ENSP00000288135.5:p.Asp816Val         | yes             | yes              | yes              | A                  | yes                   | +   | n.d. | n.d. | n.d.  |
| 1-005 | IDH2   | chr15 | 90084321            | 11/11             | ENST00000330062.5:c.1304C>T        | ENSP00000331897.3:p.Thr435Met         | no              | no               | yes              | D                  | no                    | +   | n.d. | n.d. | n.d.  |
| 1-006 | DNMT3A | chr2  | 25234373            | 23/23             | ENST00000321117.7:c.2645G>A        | ENSP00000324375.5:p.Arg882His         | yes             | yes              | yes              | A                  | yes                   | +   | n.d. | n.d. | n.d.  |
| 1-008 | KIT    | chr4  | 54695617            | 2/21              | ENST00000288135.5:c.173G>T         | ENSP00000288135.5:p.Cys58Phe          | no              | no               | no               | C                  | no                    | +   | n.d. | n.d. | n.d.  |
|       | KIT    | chr4  | 54733155            | 17/21             | ENST00000288135.5:c.2447A>T        | ENSP00000288135.5:p.Asp816Val         | yes             | yes              | yes              | A                  | yes                   | +   | n.d. | n.d. | n.d.  |
|       | RUNX1  | chr21 | 34792416            | 8/8               | ENST00000300305.5:c.1161del        | ENSP00000300305.3:p.Ser388ArgfsTer206 | no              | no               | yes              | D                  | yes                   | +   | n.d. | n.d. | n.d.  |
|       | RUNX1  | chr21 | 34887027            | 3/8               | ENST00000300305.5:c.167T>C         | ENSP00000300305.3:p.Leu56Ser          | no              | yes              | yes              | B                  | no                    | +   | n.d. | n.d. | n.d.  |
|       | ASXL1  | chr20 | 32434638            | 13/13             | ENST00000375687.6:c.1934dup        | ENSP00000364839.4:p.Gly646TrpfsTer12  | yes             | yes              | no               | A                  | yes                   | +   | n.d. | n.d. | n.d.  |
| 2-001 | DNMT3A | chr2  | 25234374            | 23/23             | ENST00000321117.7:c.2644C>T        | ENSP00000324375.5:p.Arg882Cys         | yes             | yes              | yes              | A                  | yes                   | +   | n.d. | n.d. | n.d.  |
|       | NPM1   | chr5  | 171410539           | 12/12             | ENST00000517671.3:c.860_863dup     | ENSP00000428755.1:p.Trp288CysfsTer12  | yes             | yes              | no               | A                  | yes                   | +   | n.d. | n.d. | n.d.  |
| 2-002 | DNMT3A | chr2  | 25244579            | 14/23             | ENST00000321117.7:c.1628G>T        | ENSP00000324375.5:p.Gly543Val         | no              | yes              | no               | B                  | no                    | +   | n.d. | n.d. | n.d.  |
|       | RUNX1  | chr21 | 34834566            | 6/8               | ENST00000300305.5:c.649G>A         | ENSP00000300305.3:p.Gly217Arg         | no              | no               | no               | C                  | no                    | +   | n.d. | n.d. | n.d.  |
|       | TET2   | chr4  | 105235712           | 3/11              | ENST00000380013.6:c.1771del        | ENSP00000369351.4:p.Gln591SerfsTer10  | no              | no               | no               | C                  | yes                   | +   | n.d. | n.d. | n.d.  |
|       | TET2   | chr4  | 105272773           | 10/11             | ENST00000380013.6:c.4392C>A        | ENSP00000369351.4:p.Cys1464Ter        | no              | yes              | no               | B                  | yes                   | +   | n.d. | n.d. | n.d.  |
| 2-003 | FLT3   | chr13 | 28018505            | 20/24             | ENST00000241453.9:c.2503G>C        | ENSP00000241453.7:p.Asp835His         | yes             | yes              | no               | A                  | yes                   | +   | n.d. | n.d. | n.d.  |
|       | FLT3   | chr13 | 28049450            | 8/24              | ENST00000241453.9:c.970G>A         | ENSP00000241453.7:p.Asp324Asn         | no              | yes              | yes              | B                  | no                    | +   | n.d. | n.d. | n.d.  |
| 2-004 | KIT    | chr4  | 54733154            | 17/21             | ENST00000288135.5:c.2446G>T        | ENSP00000288135.5:p.Asp816Tyr         | yes             | yes              | yes              | A                  | yes                   | +   | n.d. | n.d. | n.d.  |
|       | RUNX1  | chr21 | 34887027            | 3/8               | ENST00000300305.5:c.167T>C         | ENSP00000300305.3:p.Leu56Ser          | no              | yes              | yes              | B                  | no                    | +   | n.d. | n.d. | n.d.  |
|       | ASXL1  | chr20 | 32436457            | 13/13             | ENST00000375687.6:c.3745A>G        | ENSP00000364839.4:p.Met1249Val        | yes             | no               | yes              | D                  | no                    | +   | n.d. | n.d. | n.d.  |
|       | WT1    | chr11 | 32396363            | 7/10              | ENST00000332351.5:c.1133_1142dup   | ENSP00000331327.3:p.Ala382CysfsTer6   | no              | yes              | no               | B                  | yes                   | -   | -    | -    | +     |
| 2-005 | IDH2   | chr15 | 90087472            | 6/11              | ENST00000330062.5:c.782G>A         | ENSP00000331897.3:p.Arg261His         | no              | no               | yes              | C                  | no                    | +   | n.d. | n.d. | n.d.  |
| 2-006 | FLT3   | chr13 | 28034118            | 14/24             | ENST00000241453.9:c.1780_1800dup   | ENSP00000241453.7:p.Phe594_Asp600dup  | yes             | yes              | no               | A                  | no                    | +   | n.d. | n.d. | n.d.  |
|       | TET2   | chr4  | 105237193           | 3/11              | ENST00000380013.6:c.3251A>C        | ENSP00000369351.4:p.Gln1084Pro        | no              | no               | yes              | D                  | no                    | -   | +    | n.d. | n.d.  |

|       |        |       |           |       |                                    |                                                              |     |     |     |   |     |   |      |      |      |
|-------|--------|-------|-----------|-------|------------------------------------|--------------------------------------------------------------|-----|-----|-----|---|-----|---|------|------|------|
| 2-007 | KIT    | chr4  | 54726036  | 9/21  | ENST00000288135.5:c.1526A>T        | ENSP00000288135.5:p.Lys509Ile                                | no  | yes | no  | B | no  | + | n.d. | n.d. | n.d. |
|       | TET2   | chr4  | 105259708 | 7/11  | ENST00000380013.6:c.3893G>A        | ENSP00000369351.4:p.Cys1298Tyr                               | no  | yes | no  | B | yes | + | n.d. | n.d. | n.d. |
|       | CEBPA  | chr19 | 33301447  | 1/1   | ENST00000498907.2:c.968G>T         | ENSP00000427514.1:p.Arg323Leu                                | no  | yes | no  | B | no  | + | n.d. | n.d. | n.d. |
| 2-008 | FLT3   | chr13 | 28018503  | 20/24 | ENST00000241453.9:c.2505T>G        | ENSP00000241453.7:p.Asp835Glu                                | yes | yes | yes | A | yes | + | n.d. | n.d. | n.d. |
|       | IDH1   | chr2  | 208243577 | 6/10  | ENST00000345146.4:c.548A>G         | ENSP00000260985.2:p.Tyr183Cys                                | no  | no  | yes | D | no  | + | n.d. | n.d. | n.d. |
|       | RUNX1  | chr21 | 34799384  | 7/8   | ENST00000300305.5:c.883dup         | ENSP00000300305.3:p.Ser295PhefsTer305                        | no  | no  | no  | C | yes | + | n.d. | n.d. | n.d. |
| 2-009 | FLT3   | chr13 | 28052579  | 5/24  | ENST00000241453.9:c.580G>A         | ENSP00000241453.7:p.Val194Met                                | no  | yes | yes | B | no  | + | n.d. | n.d. | n.d. |
|       | TET2   | chr4  | 105237193 | 3/11  | ENST00000380013.6:c.3251A>C        | ENSP00000369351.4:p.Gln1084Pro                               | no  | no  | yes | D | no  | - | +    | n.d. | n.d. |
|       | CEBPA  | chr19 | 33301478  | 1/1   | ENST00000498907.2:c.934_936dup     | ENSP00000427514.1:p.Gln312dup                                | no  | yes | no  | B | no  | + | n.d. | n.d. | n.d. |
|       | CEBPA  | chr19 | 33302075  | 1/1   | ENST00000498907.2:c.332_339del     | ENSP00000427514.1:p.Ala111GlyfsTer56                         | no  | yes | no  | B | yes | + | n.d. | n.d. | n.d. |
| 2-010 | TET2   | chr4  | 105275662 | 11/11 | ENST00000380013.6:c.5152G>T        | ENSP00000369351.4:p.Val1718Leu                               | no  | yes | yes | B | no  | + | n.d. | n.d. | n.d. |
|       | NRAS   | chr1  | 114716127 | 2/7   | ENST00000369535.4:c.34G>T          | ENSP00000358548.4:p.Gly12Cys                                 | yes | yes | no  | A | yes | + | n.d. | n.d. | n.d. |
| 2-011 | FLT3   | chr13 | 28018502  | 20/24 | ENST00000241453.9:c.2503_2505del   | ENSP00000241453.7:p.Asp835del                                | yes | yes | yes | A | yes | + | n.d. | n.d. | n.d. |
|       | FLT3   | chr13 | 28018505  | 20/24 | ENST00000241453.9:c.2503G>T        | ENSP00000241453.7:p.Asp835Tyr                                | yes | yes | no  | A | yes | + | n.d. | n.d. | n.d. |
|       | IDH1   | chr2  | 208248388 | 4/10  | ENST00000345146.4:c.395G>A         | ENSP00000260985.2:p.Arg132His                                | yes | yes | yes | A | yes | + | n.d. | n.d. | n.d. |
|       | NPM1   | chr5  | 171410539 | 12/12 | ENST00000517671.3:c.860_863dup     | ENSP00000428755.1:p.Trp288CysfsTer12                         | yes | yes | no  | A | yes | + | n.d. | n.d. | n.d. |
| 2-012 | NPM1   | chr5  | 171410541 | 12/12 | ENST00000517671.3:c.863_864insCTTG | ENSP00000428755.1:p.Trp288CysfsTer12                         | yes | yes | no  | A | yes | + | n.d. | n.d. | n.d. |
| 2-013 | RUNX1  | chr21 | 34880640  | 4/8   | ENST00000300305.5:c.423_424dup     | ENSP00000300305.3:p.Ala142GlyfsTer4                          | no  | yes | no  | B | yes | + | n.d. | n.d. | n.d. |
| 2-014 | KIT    | chr4  | 54658066  | 1/21  | ENST00000288135.5:c.52C>T          | ENSP00000288135.5:p.Leu18Phe                                 | no  | no  | yes | D | no  | + | n.d. | n.d. | n.d. |
|       | RUNX1  | chr21 | 34887027  | 3/8   | ENST00000300305.5:c.167T>C         | ENSP00000300305.3:p.Leu56Ser                                 | no  | yes | yes | B | no  | + | n.d. | n.d. | n.d. |
|       | CEBPA  | chr19 | 33301825  | 1/1   | ENST00000498907.2:c.584_589dup     | ENSP00000427514.1:p.His195_Pro196dup                         | no  | no  | no  | C | no  | - | +    | n.d. | n.d. |
| 2-015 | DNMT3A | chr2  | 25244603  | 14/23 | ENST00000321117.7:c.1583_1603dup   | ENSP00000324375.5:p.Tyr528_Gln534dup                         | no  | no  | no  | C | no  | + | n.d. | n.d. | n.d. |
|       | TET2   | chr4  | 105272692 | 10/11 | ENST00000380013.6:c.4317dup        | ENSP00000369351.4:p.Arg1440ThrfsTer38                        | no  | no  | no  | C | yes | - | +    | n.d. | n.d. |
|       | NPM1   | chr5  | 171410539 | 12/12 | ENST00000517671.3:c.860_863dup     | ENSP00000428755.1:p.Trp288CysfsTer12                         | yes | yes | no  | A | yes | + | n.d. | n.d. | n.d. |
| 2-016 | DNMT3A | chr2  | 25244580  | 14/23 | ENST00000321117.7:c.1627G>T        | ENSP00000324375.5:p.Gly543Cys                                | no  | yes | no  | B | no  | + | n.d. | n.d. | n.d. |
|       | TET2   | chr4  | 105234042 | 3/11  | ENST00000380013.6:c.100C>T         | ENSP00000369351.4:p.Leu34Phe                                 | no  | no  | yes | D | no  | + | n.d. | n.d. | n.d. |
|       | NPM1   | chr5  | 171410539 | 12/12 | ENST00000517671.3:c.860_863dup     | ENSP00000428755.1:p.Trp288CysfsTer12                         | yes | yes | no  | A | yes | + | n.d. | n.d. | n.d. |
|       | WT1    | chr11 | 32391978  | 9/10  | ENST00000332351.5:c.1426A>G        | ENSP00000331327.3:p.Lys476Glu                                | no  | no  | no  | C | no  | - | +    | n.d. | n.d. |
| 2-018 | FLT3   | chr13 | 28034114  | 14/24 | ENST00000241453.9:c.1781_1804dup   | ENSP00000241453.7:p.Leu601_Lys602insIleArgGluTyrGluTyrAspLeu | yes | yes | no  | A | no  | + | n.d. | n.d. | n.d. |
|       | NPM1   | chr5  | 171410539 | 12/12 | ENST00000517671.3:c.860_863dup     | ENSP00000428755.1:p.Trp288CysfsTer12                         | yes | yes | no  | A | yes | + | n.d. | n.d. | n.d. |
| 2-019 | TP53   | chr17 | 7674885   | 6/11  | ENST00000269305.6:c.646G>A         | ENSP00000269305.4:p.Val216Met                                | no  | yes | no  | B | yes | + | n.d. | n.d. | n.d. |
| 2-020 | ASXL1  | chr20 | 32434789  | 13/13 | ENST00000375687.6:c.2077C>T        | ENSP00000364839.4:p.Arg693Ter                                | yes | yes | yes | A | yes | + | n.d. | n.d. | n.d. |
| 2-021 | RUNX1  | chr21 | 34886877  | 3/8   | ENST00000300305.5:c.317G>C         | ENSP00000300305.3:p.Trp106Ser                                | no  | no  | no  | C | no  | + | n.d. | n.d. | n.d. |
|       | ASXL1  | chr20 | 32434599  | 13/13 | ENST00000375687.6:c.1900_1922del   | ENSP00000364839.4:p.Glu635ArgfsTer15                         | yes | yes | no  | A | yes | - | -    | +    | n.d. |
| 2-022 | FLT3   | chr13 | 28036022  | 11/24 | ENST00000241453.9:c.1331A>T        | ENSP00000241453.7:p.Glu444Val                                | no  | no  | no  | C | no  | + | n.d. | n.d. | n.d. |
| 2-023 | DNMT3A | chr2  | 25240672  | 18/23 | ENST00000321117.7:c.2141C>G        | ENSP00000324375.5:p.Ser714Cys                                | no  | yes | yes | B | yes | + | n.d. | n.d. | n.d. |
|       | RUNX1  | chr21 | 34792223  | 8/8   | ENST00000300305.5:c.1342_1354dup   | ENSP00000300305.3:p.Val452GlufsTer152                        | no  | no  | no  | C | yes | + | n.d. | n.d. | n.d. |

|       |        |           |           |                             |                                                     |                                                        |     |     |     |    |     |      |      |      |      |
|-------|--------|-----------|-----------|-----------------------------|-----------------------------------------------------|--------------------------------------------------------|-----|-----|-----|----|-----|------|------|------|------|
|       | NPM1   | chr5      | 171410539 | 12/12                       | ENST00000517671.3:c.860_863dup                      | ENSP00000428755.1.p.Trp288CysfsTer12                   | yes | yes | no  | A  | yes | +    | n.d. | n.d. | n.d. |
| 2-024 | DNMT3A | chr2      | 25240666  | 18/23                       | ENST00000321117.7:c.2147T>A                         | ENSP00000324375.5.p.Val716Asp                          | no  | yes | no  | B  | yes | +    | n.d. | n.d. | n.d. |
|       | RUNX1  | chr21     | 34886871  | 3/8                         | ENST00000300305.5:c.323G>C                          | ENSP00000300305.3.p.Cys108Ser                          | no  | no  | no  | C  | no  | +    | n.d. | n.d. | n.d. |
|       |        | chr21     | 34886872  | 3/8                         | ENST00000300305.5:c.322T>A                          | ENSP00000300305.3.p.Cys108Ser                          | no  | no  | no  | C  | no  | +    | n.d. | n.d. | n.d. |
|       |        | chr21     | 34886874  | 3/8                         | ENST00000300305.5:c.320G>A                          | ENSP00000300305.3.p.Arg107His                          | no  | yes | no  | B  | no  | +    | n.d. | n.d. | n.d. |
| TET2  | chr4   | 105275613 | 11/11     | ENST00000380013.6:c.5103G>A | ENSP00000369351.4.p.Met1701Ile                      | no                                                     | no  | yes | D   | no | +   | n.d. | n.d. | n.d. |      |
| 2-025 | NRAS   | chr1      | 114713908 | 3/7                         | ENST00000369535.4:c.182A>G                          | ENSP00000358548.4.p.Gln61Arg                           | yes | yes | no  | A  | yes | +    | n.d. | n.d. | n.d. |
|       | CEBPA  | chr19     | 33302154  | 1/1                         | ENST00000498907.2:c.260del                          | ENSP00000427514.1.p.Gln87ArgfsTer73                    | no  | no  | no  | C  | yes | +    | n.d. | n.d. | n.d. |
| 2-027 | IDH1   | chr2      | 208248389 | 4/10                        | ENST00000345146.4:c.394C>T                          | ENSP00000260985.2.p.Arg132Cys                          | yes | yes | yes | A  | yes | +    | n.d. | n.d. | n.d. |
|       | ASXL1  | chr20     | 32434638  | 13/13                       | ENST00000375687.6:c.1934dup                         | ENSP00000364839.4.p.Gly646TrpfsTer12                   | yes | yes | no  | A  | yes | -    | +    | n.d. | n.d. |
|       | NRAS   | chr1      | 114713909 | 3/7                         | ENST00000369535.4:c.181C>A                          | ENSP00000358548.4.p.Gln61Lys                           | yes | yes | yes | A  | yes | +    | n.d. | n.d. | n.d. |
| 2-028 | DNMT3A | chr2      | 25248139  | 7/23                        | ENST00000321117.7:c.752dup                          | ENSP00000324375.5.p.Asp252Ter                          | no  | no  | no  | C  | yes | +    | n.d. | n.d. | n.d. |
|       | TET2   | chr4      | 105234350 | 3/11                        | ENST00000380013.6:c.409del                          | ENSP00000369351.4.p.Ser137ValfsTer8                    | no  | no  | no  | C  | yes | +    | n.d. | n.d. | n.d. |
|       | TET2   | chr4      | 105236721 | 3/11                        | ENST00000380013.6:c.2784del                         | ENSP00000369351.4.p.Pro929LeufsTer24                   | no  | no  | no  | C  | yes | +    | n.d. | n.d. | n.d. |
|       | NPM1   | chr5      | 171410539 | 12/12                       | ENST00000517671.3:c.860_863dup                      | ENSP00000428755.1.p.Trp288CysfsTer12                   | yes | yes | no  | A  | yes | +    | n.d. | n.d. | n.d. |
| 2-029 | DNMT3A | chr2      | 25234367  | 23/23                       | ENST00000321117.7:c.2651C>T                         | ENSP00000324375.5.p.Ala884Val                          | no  | yes | no  | B  | yes | +    | n.d. | n.d. | n.d. |
|       | IDH1   | chr2      | 208245342 | 5/10                        | ENST00000345146.4:c.497C>T                          | ENSP00000260985.2.p.Thr166Ile                          | no  | no  | no  | C  | no  | +    | n.d. | n.d. | n.d. |
|       | NPM1   | chr5      | 171410539 | 12/12                       | ENST00000517671.3:c.860_863dup                      | ENSP00000428755.1.p.Trp288CysfsTer12                   | yes | yes | no  | A  | yes | +    | n.d. | n.d. | n.d. |
| 2-030 | DNMT3A | chr2      | 25243931  | 16/23                       | ENST00000321117.7:c.1903C>T                         | ENSP00000324375.5.p.Arg635Trp                          | no  | yes | yes | B  | yes | +    | n.d. | n.d. | n.d. |
|       | NPM1   | chr5      | 171410539 | 12/12                       | ENST00000517671.3:c.860_863dup                      | ENSP00000428755.1.p.Trp288CysfsTer12                   | yes | yes | no  | A  | yes | +    | n.d. | n.d. | n.d. |
|       | IDH2   | chr15     | 90088702  | 4/11                        | ENST00000330062.5:c.419G>A                          | ENSP00000331897.3.p.Arg140Gln                          | yes | yes | yes | A  | yes | +    | n.d. | n.d. | n.d. |
|       | WT1    | chr11     | 32396358  | 7/10                        | ENST00000332351.5:c.1143_1147dup                    | ENSP00000331327.3.p.Ser383TrpfsTer68                   | no  | no  | no  | C  | yes | +    | n.d. | n.d. | n.d. |
| 2-032 | FLT3   | chr13     | 28034125  | 14/24                       | ENST00000241453.9:c.1793_1794insGCCCTTCAGAGAAATATGA | ENSP00000241453.7.p.Glu598_Tyr599insProPheArgGluTyrGlu | yes | yes | no  | A  | no  | +    | n.d. | n.d. | n.d. |
|       | WT1    | chr11     | 32396365  | 7/10                        | ENST00000332351.5:c.1140dup                         | ENSP00000331327.3.p.Ser381ValfsTer4                    | no  | yes | no  | B  | yes | -    | +    | n.d. | n.d. |
|       |        | chr11     | 32396368  | 7/10                        | ENST00000332351.5:c.1138C>G                         | ENSP00000331327.3.p.Arg380Gly                          | no  | yes | no  | B  | no  | -    | +    | n.d. | n.d. |
| 2-033 | FLT3   | chr13     | 28034116  | 14/24                       | ENST00000241453.9:c.1779_1802dup                    | ENSP00000241453.7.p.Phe594_Leu601dup                   | yes | no  | no  | A  | no  | +    | n.d. | n.d. | n.d. |
|       | TET2   | chr4      | 105234647 | 3/11                        | ENST00000380013.6:c.706del                          | ENSP00000369351.4.p.Asp236IlefsTer14                   | no  | no  | no  | C  | yes | +    | n.d. | n.d. | n.d. |
|       | TET2   | chr4      | 105275653 | 11/11                       | ENST00000380013.6:c.5145_5151del                    | ENSP00000369351.4.p.His1716Ter                         | no  | no  | no  | C  | yes | +    | n.d. | n.d. | n.d. |
|       | NPM1   | chr5      | 171410539 | 12/12                       | ENST00000517671.3:c.860_863dup                      | ENSP00000428755.1.p.Trp288CysfsTer12                   | yes | yes | no  | A  | yes | +    | n.d. | n.d. | n.d. |
| 2-034 | FLT3   | chr13     | 28034345  | 13/24                       | ENST00000241453.9:c.1660T>A                         | ENSP00000241453.7.p.Phe554Ile                          | no  | no  | no  | C  | no  | +    | n.d. | n.d. | n.d. |
|       | FLT3   | chr13     | 28034347  | 13/24                       | ENST00000241453.9:c.1658T>C                         | ENSP00000241453.7.p.Leu553Pro                          | no  | no  | no  | C  | no  | +    | n.d. | n.d. | n.d. |
|       | TET2   | chr4      | 105275613 | 11/11                       | ENST00000380013.6:c.5103G>A                         | ENSP00000369351.4.p.Met1701Ile                         | no  | no  | yes | D  | no  | +    | n.d. | n.d. | n.d. |
|       | NPM1   | chr5      | 171410539 | 12/12                       | ENST00000517671.3:c.860_863dup                      | ENSP00000428755.1.p.Trp288CysfsTer12                   | yes | yes | no  | A  | yes | +    | n.d. | n.d. | n.d. |
| 2-035 | FLT3   | chr13     | 28034125  | 14/24                       | ENST00000241453.9:c.1776_1793dup                    | ENSP00000241453.7.p.Tyr597_Glu598insAspPheArgGluTyr    | yes | yes | no  | A  | no  | +    | n.d. | n.d. | n.d. |
|       | ASXL1  | chr20     | 32436018  | 13/13                       | ENST00000375687.6:c.3306G>T                         | ENSP00000364839.4.p.Glu1102Asp                         | yes | yes | yes | A  | no  | +    | n.d. | n.d. | n.d. |
|       | NPM1   | chr5      | 171410539 | 12/12                       | ENST00000517671.3:c.860_863dup                      | ENSP00000428755.1.p.Trp288CysfsTer12                   | yes | yes | no  | A  | yes | +    | n.d. | n.d. | n.d. |
| 2-036 | DNMT3A | chr2      | 25234373  | 23/23                       | ENST00000321117.7:c.2645G>C                         | ENSP00000324375.5.p.Arg882Pro                          | yes | yes | yes | A  | yes | +    | n.d. | n.d. | n.d. |

|       |        |       |           |       |                                        |                                            |     |     |     |   |     |   |      |      |      |
|-------|--------|-------|-----------|-------|----------------------------------------|--------------------------------------------|-----|-----|-----|---|-----|---|------|------|------|
|       | RUNX1  | chr21 | 34887027  | 3/8   | ENST00000300305.5:c.167T>C             | ENSP00000300305.3.p.Leu56Ser               | no  | yes | yes | B | no  | + | n.d. | n.d. | n.d. |
|       | CEBPA  | chr19 | 33302075  | 1/1   | ENST00000498907.2:c.332_339del         | ENSP00000427514.1.p.Ala111GlyfsTer56       | no  | yes | no  | B | yes | + | n.d. | n.d. | n.d. |
| 2-037 | RUNX1  | chr21 | 34859495  | 5/8   | ENST00000300305.5:c.592G>A             | ENSP00000300305.3.p.Asp198Asn              | no  | yes | no  | B | no  | + | n.d. | n.d. | n.d. |
|       | ASXL1  | chr20 | 32434638  | 13/13 | ENST00000375687.6:c.1934dup            | ENSP00000364839.4.p.Gly646TrpfsTer12       | yes | yes | no  | A | yes | - | -    | +    | n.d. |
| 2-038 | NRAS   | chr1  | 114713908 | 3/7   | ENST00000369535.4:c.182A>G             | ENSP00000358548.4.p.Gln61Arg               | yes | yes | no  | A | yes | + | n.d. | n.d. | n.d. |
|       |        | chr1  | 114713909 | 3/7   | ENST00000369535.4:c.181C>A             | ENSP00000358548.4.p.Gln61Lys               | yes | yes | yes | A | yes | + | n.d. | n.d. | n.d. |
|       | NRAS   | chr1  | 114716126 | 2/7   | ENST00000369535.4:c.35G>C              | ENSP00000358548.4.p.Gly12Ala               | yes | yes | no  | A | yes | + | n.d. | n.d. | n.d. |
| 2-039 | RUNX1  | chr21 | 34886865  | 3/8   | ENST00000300305.5:c.329A>G             | ENSP00000300305.3.p.Lys110Arg              | no  | yes | no  | B | no  | + | n.d. | n.d. | n.d. |
|       | CEBPA  | chr19 | 33301475  | 1/1   | ENST00000498907.2:c.937_939dup         | ENSP00000427514.1.p.Lys313dup              | no  | yes | no  | B | no  | + | n.d. | n.d. | n.d. |
|       | CEBPA  | chr19 | 33302060  | 1/1   | ENST00000498907.2:c.354del             | ENSP00000427514.1.p.Val119SerfsTer41       | no  | no  | no  | C | yes | + | n.d. | n.d. | n.d. |
| 2-040 | DNMT3A | chr2  | 25234373  | 23/23 | ENST00000321117.7:c.2645G>C            | ENSP00000324375.5.p.Arg882Pro              | yes | yes | yes | A | yes | + | n.d. | n.d. | n.d. |
|       | RUNX1  | chr21 | 34887027  | 3/8   | ENST00000300305.5:c.167T>C             | ENSP00000300305.3.p.Leu56Ser               | no  | yes | yes | B | no  | + | n.d. | n.d. | n.d. |
|       | WT1    | chr11 | 32396399  | 7/10  | ENST00000332351.5:c.1106dup            | ENSP00000331327.3.p.Arg370ThrfsTer15       | no  | yes | no  | B | yes | + | n.d. | n.d. | n.d. |
|       |        | chr11 | 32396401  | 7/10  | ENST00000332351.5:c.1105C>G            | ENSP00000331327.3.p.Arg369Gly              | no  | yes | no  | B | no  | + | n.d. | n.d. | n.d. |
| 2-041 | DNMT3A | chr2  | 25234374  | 23/23 | ENST00000321117.7:c.2644C>T            | ENSP00000324375.5.p.Arg882Cys              | yes | yes | yes | A | yes | + | n.d. | n.d. | n.d. |
|       | TET2   | chr4  | 105234995 | 3/11  | ENST00000380013.6:c.1054del            | ENSP00000369351.4.p.Phe352SerfsTer20       | no  | no  | no  | C | yes | + | n.d. | n.d. | n.d. |
|       | NPM1   | chr5  | 171410539 | 12/12 | ENST00000517671.3:c.860_863dup         | ENSP00000428755.1.p.Trp288CysfsTer12       | yes | yes | no  | A | yes | + | n.d. | n.d. | n.d. |
| 2-044 | FLT3   | chr13 | 28049450  | 8/24  | ENST00000241453.9:c.970G>A             | ENSP00000241453.7.p.Asp324Asn              | no  | yes | yes | B | no  | + | n.d. | n.d. | n.d. |
|       |        | chr4  | 54723599  | 8/21  | ENST00000288135.5:c.1248_1249del       | ENSP00000288135.5.p.Thr417LeufsTer30       | yes | no  | no  | C | no  | - | -    | +    | n.d. |
|       | KIT    | chr4  | 54723605  | 8/21  | ENST00000288135.5:c.1254_1255insCTTCTT | ENSP00000288135.5.p.Tyr418_Asp419insPhePhe | yes | yes | no  | A | no  | + | n.d. | n.d. | n.d. |
|       |        | chr4  | 54723606  | 8/21  | ENST00000288135.5:c.1255_1258del       | ENSP00000288135.5.p.Asp419GlyfsTer3        | yes | yes | no  | A | no  | - | -    | -    | +    |
| 2-045 | WT1    | chr11 | 32392014  | 9/10  | ENST00000332351.5:c.1390G>C            | ENSP00000331327.3.p.Asp464His              | no  | yes | yes | B | no  | + | n.d. | n.d. | n.d. |
|       | NRAS   | chr1  | 114713907 | 3/7   | ENST00000369535.4:c.183A>T             | ENSP00000358548.4.p.Gln61His               | yes | yes | yes | A | yes | + | n.d. | n.d. | n.d. |
|       | CEBPA  | chr19 | 33301475  | 1/1   | ENST00000498907.2:c.937_939dup         | ENSP00000427514.1.p.Lys313dup              | no  | yes | no  | B | no  | + | n.d. | n.d. | n.d. |
|       | CEBPA  | chr19 | 33302118  | 1/1   | ENST00000498907.2:c.296dup             | ENSP00000427514.1.p.Gly100ArgfsTer8        | no  | no  | no  | C | yes | + | n.d. | n.d. | n.d. |
| 2-046 | DNMT3A | chr2  | 25234373  | 23/23 | ENST00000321117.7:c.2645G>A            | ENSP00000324375.5.p.Arg882His              | yes | yes | yes | A | yes | + | n.d. | n.d. | n.d. |
|       | ASXL1  | chr20 | 32436018  | 13/13 | ENST00000375687.6:c.3306G>T            | ENSP00000364839.4.p.Glu1102Asp             | yes | yes | yes | A | no  | + | n.d. | n.d. | n.d. |
|       | NPM1   | chr5  | 171410539 | 12/12 | ENST00000517671.3:c.860_863dup         | ENSP00000428755.1.p.Trp288CysfsTer12       | yes | yes | no  | A | yes | + | n.d. | n.d. | n.d. |
| 2-048 | DNMT3A | chr2  | 25234373  | 23/23 | ENST00000321117.7:c.2645G>A            | ENSP00000324375.5.p.Arg882His              | yes | yes | yes | A | yes | + | n.d. | n.d. | n.d. |
|       | FLT3   | chr13 | 28018503  | 20/24 | ENST00000241453.9:c.2505T>G            | ENSP00000241453.7.p.Asp835Glu              | yes | yes | yes | A | yes | + | n.d. | n.d. | n.d. |
|       | NPM1   | chr5  | 171410539 | 12/12 | ENST00000517671.3:c.860_863dup         | ENSP00000428755.1.p.Trp288CysfsTer12       | yes | yes | no  | A | yes | + | n.d. | n.d. | n.d. |
|       | CEBPA  | chr19 | 33301484  | 1/1   | ENST00000498907.2:c.930dup             | ENSP00000427514.1.p.Gln311AlafsTer10       | no  | yes | no  | B | yes | + | n.d. | n.d. | n.d. |
| 2-049 | DNMT3A | chr2  | 25234373  | 23/23 | ENST00000321117.7:c.2645G>C            | ENSP00000324375.5.p.Arg882Pro              | yes | yes | yes | A | yes | + | n.d. | n.d. | n.d. |
|       | RUNX1  | chr21 | 34887027  | 3/8   | ENST00000300305.5:c.167T>C             | ENSP00000300305.3.p.Leu56Ser               | no  | yes | yes | B | no  | + | n.d. | n.d. | n.d. |
|       | NPM1   | chr5  | 171410539 | 12/12 | ENST00000517671.3:c.860_863dup         | ENSP00000428755.1.p.Trp288CysfsTer12       | yes | yes | no  | A | yes | + | n.d. | n.d. | n.d. |
|       | IDH2   | chr15 | 90088702  | 4/11  | ENST00000330062.5:c.419G>A             | ENSP00000331897.3.p.Arg140Gln              | yes | yes | yes | A | yes | + | n.d. | n.d. | n.d. |
|       | NRAS   | chr1  | 114716126 | 2/7   | ENST00000369535.4:c.35G>A              | ENSP00000358548.4.p.Gly12Asp               | yes | yes | no  | A | yes | + | n.d. | n.d. | n.d. |

|       |        |       |           |       |                                      |                                                                       |     |     |     |   |     |   |      |      |      |
|-------|--------|-------|-----------|-------|--------------------------------------|-----------------------------------------------------------------------|-----|-----|-----|---|-----|---|------|------|------|
| 2-050 | FLT3   | chr13 | 28015643  | 21/24 | ENST00000241453.9:c.2600T>C          | ENSP00000241453.7:p.Ile867Thr                                         | no  | no  | no  | C | no  | + | n.d. | n.d. | n.d. |
|       | RUNX1  | chr21 | 34886866  | 3/8   | ENST00000300305.5:c.328A>C           | ENSP00000300305.3:p.Lys110Gln                                         | no  | no  | yes | D | no  | + | n.d. | n.d. | n.d. |
|       | TET2   | chr4  | 105272692 | 10/11 | ENST00000380013.6:c.4317dup          | ENSP00000369351.4:p.Arg1440ThrfsTer38                                 | no  | no  | no  | C | yes | + | n.d. | n.d. | n.d. |
|       | NRAS   | chr1  | 114713907 | 3/7   | ENST00000369535.4:c.183A>C           | ENSP00000358548.4:p.Gln61His                                          | yes | yes | yes | A | yes | + | n.d. | n.d. | n.d. |
| 2-051 | NPM1   | chr5  | 171410539 | 12/12 | ENST00000517671.3:c.860_863dup       | ENSP00000428755.1:p.Trp288CysfsTer12                                  | yes | yes | no  | A | yes | + | n.d. | n.d. | n.d. |
|       | IDH2   | chr15 | 90088702  | 4/11  | ENST00000330062.5:c.419G>A           | ENSP00000331897.3:p.Arg140Gln                                         | yes | yes | yes | A | yes | + | n.d. | n.d. | n.d. |
| 2-052 | IDH1   | chr2  | 208248388 | 4/10  | ENST00000345146.4:c.395G>A           | ENSP00000260985.2:p.Arg132His                                         | yes | yes | yes | A | yes | + | n.d. | n.d. | n.d. |
| 2-053 | KIT    | chr4  | 54733154  | 17/21 | ENST00000288135.5:c.2446G>T          | ENSP00000288135.5:p.Asp816Tyr                                         | yes | yes | yes | A | yes | + | n.d. | n.d. | n.d. |
|       | NRAS   | chr1  | 114713907 | 3/7   | ENST00000369535.4:c.183A>C           | ENSP00000358548.4:p.Gln61His                                          | yes | yes | yes | A | yes | + | n.d. | n.d. | n.d. |
| 2-054 | DNMT3A | chr2  | 25240727  | 18/23 | ENST00000321117.7:c.2086C>T          | ENSP00000324375.5:p.Gln696Ter                                         | no  | yes | no  | B | yes | + | n.d. | n.d. | n.d. |
| 3-001 | TET2   | chr4  | 105234042 | 3/11  | ENST00000380013.6:c.100C>T           | ENSP00000369351.4:p.Leu34Phe                                          | no  | no  | yes | D | no  | + | n.d. | n.d. | n.d. |
|       | TET2   | chr4  | 105272692 | 10/11 | ENST00000380013.6:c.4317dup          | ENSP00000369351.4:p.Arg1440ThrfsTer38                                 | no  | no  | no  | C | yes | - | +    | n.d. | n.d. |
| 3-003 | WT1    | chr11 | 32392029  | 9/10  | ENST00000332351.5:c.1374_1375insCTCT | ENSP00000331327.3:p.Lys459LeufsTer2                                   | no  | no  | no  | C | yes | - | +    | n.d. | n.d. |
|       | CEBPA  | chr19 | 33302214  | 1/1   | ENST00000498907.2:c.196_200dup       | ENSP00000427514.1:p.Tyr67Ter                                          | no  | yes | no  | B | yes | + | n.d. | n.d. | n.d. |
| 3-004 | DNMT3A | chr2  | 25234374  | 23/23 | ENST00000321117.7:c.2644C>T          | ENSP00000324375.5:p.Arg882Cys                                         | yes | yes | yes | A | yes | + | n.d. | n.d. | n.d. |
| 3-005 | DNMT3A | chr2  | 25234373  | 23/23 | ENST00000321117.7:c.2645G>A          | ENSP00000324375.5:p.Arg882His                                         | yes | yes | yes | A | yes | + | n.d. | n.d. | n.d. |
|       | TET2   | chr4  | 105234042 | 3/11  | ENST00000380013.6:c.100C>T           | ENSP00000369351.4:p.Leu34Phe                                          | no  | no  | yes | D | no  | + | n.d. | n.d. | n.d. |
|       | TET2   | chr4  | 105236491 | 3/11  | ENST00000380013.6:c.2549A>G          | ENSP00000369351.4:p.His850Arg                                         | no  | no  | yes | D | no  | + | n.d. | n.d. | n.d. |
|       | NPM1   | chr5  | 171410539 | 12/12 | ENST00000517671.3:c.860_863dup       | ENSP00000428755.1:p.Trp288CysfsTer12                                  | yes | yes | no  | A | yes | + | n.d. | n.d. | n.d. |
| 3-006 | DNMT3A | chr2  | 25245284  | 13/23 | ENST00000321117.7:c.1522del          | ENSP00000324375.5:p.Leu508SerfsTer143                                 | no  | no  | no  | C | yes | + | n.d. | n.d. | n.d. |
|       | IDH1   | chr2  | 208243577 | 6/10  | ENST00000345146.4:c.548A>G           | ENSP00000260985.2:p.Tyr183Cys                                         | no  | no  | yes | D | no  | + | n.d. | n.d. | n.d. |
|       | RUNX1  | chr21 | 34792566  | 8/8   | ENST00000300305.5:c.1011dup          | ENSP00000300305.3:p.Ala338ArgfsTer262                                 | no  | yes | no  | B | yes | + | n.d. | n.d. | n.d. |
|       | IDH2   | chr15 | 90088702  | 4/11  | ENST00000330062.5:c.419G>A           | ENSP00000331897.3:p.Arg140Gln                                         | yes | yes | yes | A | yes | + | n.d. | n.d. | n.d. |
| 3-007 | FLT3   | chr13 | 28049450  | 8/24  | ENST00000241453.9:c.970G>A           | ENSP00000241453.7:p.Asp324Asn                                         | no  | yes | yes | B | no  | + | n.d. | n.d. | n.d. |
|       | KIT    | chr4  | 54733155  | 17/21 | ENST00000288135.5:c.2447A>T          | ENSP00000288135.5:p.Asp816Val                                         | yes | yes | yes | A | yes | + | n.d. | n.d. | n.d. |
|       | TET2   | chr4  | 105272692 | 10/11 | ENST00000380013.6:c.4317dup          | ENSP00000369351.4:p.Arg1440ThrfsTer38                                 | no  | no  | no  | C | yes | - | -    | +    | n.d. |
|       | ASXL1  | chr20 | 32435346  | 13/13 | ENST00000375687.6:c.2634T>A          | ENSP00000364839.4:p.Ser878Arg                                         | yes | no  | no  | C | no  | + | n.d. | n.d. | n.d. |
| 3-009 | DNMT3A | chr2  | 25240313  | 19/23 | ENST00000321117.7:c.2311C>T          | ENSP00000324375.5:p.Arg771Ter                                         | no  | yes | no  | B | yes | + | n.d. | n.d. | n.d. |
|       | IDH1   | chr2  | 208248389 | 4/10  | ENST00000345146.4:c.394C>G           | ENSP00000260985.2:p.Arg132Gly                                         | yes | yes | yes | A | yes | + | n.d. | n.d. | n.d. |
|       | NPM1   | chr5  | 171410539 | 12/12 | ENST00000517671.3:c.860_863dup       | ENSP00000428755.1:p.Trp288CysfsTer12                                  | yes | yes | no  | A | yes | + | n.d. | n.d. | n.d. |
| 3-010 | FLT3   | chr13 | 28018503  | 20/24 | ENST00000241453.9:c.2505T>G          | ENSP00000241453.7:p.Asp835Glu                                         | yes | yes | yes | A | yes | + | n.d. | n.d. | n.d. |
|       | IDH1   | chr2  | 208243577 | 6/10  | ENST00000345146.4:c.548A>G           | ENSP00000260985.2:p.Tyr183Cys                                         | no  | no  | yes | D | no  | + | n.d. | n.d. | n.d. |
| 3-011 | FLT3   | chr13 | 28034113  | 14/24 | ENST00000241453.9:c.1773_1805dup     | ENSP00000241453.7:p.Leu601_Lys602insAsnValAspPheArgGluTyrGluTyrAspLeu | yes | yes | no  | A | no  | + | n.d. | n.d. | n.d. |
|       | NPM1   | chr5  | 171410539 | 12/12 | ENST00000517671.3:c.860_863dup       | ENSP00000428755.1:p.Trp288CysfsTer12                                  | yes | yes | no  | A | yes | + | n.d. | n.d. | n.d. |
|       | CEBPA  | chr19 | 33302046  | 1/1   | ENST00000498907.2:c.368dup           | ENSP00000427514.1:p.Ala124SerfsTer46                                  | no  | no  | no  | C | yes | + | n.d. | n.d. | n.d. |
| 3-012 | DNMT3A | chr2  | 25234374  | 23/23 | ENST00000321117.7:c.2644C>A          | ENSP00000324375.5:p.Arg882Ser                                         | yes | yes | yes | A | no  | + | n.d. | n.d. | n.d. |
|       | NPM1   | chr5  | 171410539 | 12/12 | ENST00000517671.3:c.860_863dup       | ENSP00000428755.1:p.Trp288CysfsTer12                                  | yes | yes | no  | A | yes | + | n.d. | n.d. | n.d. |

|       |        |           |           |                           |                                    |                                       |     |     |     |     |     |      |      |      |      |
|-------|--------|-----------|-----------|---------------------------|------------------------------------|---------------------------------------|-----|-----|-----|-----|-----|------|------|------|------|
|       | WT1    | chr11     | 32434715  | 1/10                      | ENST00000332351.5:c.630dup         | ENSP00000331327.3.p.Ala211ArgfsTer37  | no  | no  | no  | C   | yes | +    | n.d. | n.d. | n.d. |
| 3-013 | IDH1   | chr2      | 208243532 | 6/10                      | ENST00000345146.4:c.593A>G         | ENSP00000260985.2.p.Gln198Arg         | no  | no  | yes | D   | no  | +    | n.d. | n.d. | n.d. |
|       | TET2   | chr4      | 105235995 | 3/11                      | ENST00000380013.6:c.2053C>T        | ENSP00000369351.4.p.Gln685Ter         | no  | no  | no  | C   | yes | +    | n.d. | n.d. | n.d. |
|       | NPM1   | chr5      | 171410539 | 12/12                     | ENST00000517671.3:c.860_863dup     | ENSP00000428755.1.p.Trp288CysfsTer12  | yes | yes | no  | A   | yes | +    | n.d. | n.d. | n.d. |
| 3-014 | TET2   | chr4      | 105272692 | 10/11                     | ENST00000380013.6:c.4317dup        | ENSP00000369351.4.p.Arg1440ThrsTer38  | no  | no  | no  | C   | yes | +    | n.d. | n.d. | n.d. |
| 3-015 | TP53   | chr17     | 7674220   | 7/11                      | ENST00000269305.6:c.743G>A         | ENSP00000269305.4.p.Arg248Gln         | no  | yes | yes | B   | yes | +    | n.d. | n.d. | n.d. |
|       | TET2   | chr4      | 105272591 | 10/11                     | ENST00000380013.6:c.4210C>T        | ENSP00000369351.4.p.Arg1404Ter        | no  | yes | no  | B   | yes | -    | +    | n.d. | n.d. |
|       | IDH2   | chr15     | 90088702  | 4/11                      | ENST00000330062.5:c.419G>A         | ENSP00000331897.3.p.Arg140Gln         | yes | yes | yes | A   | yes | +    | n.d. | n.d. | n.d. |
| 3-016 | IDH2   | chr15     | 90088702  | 4/11                      | ENST00000330062.5:c.419G>A         | ENSP00000331897.3.p.Arg140Gln         | yes | yes | yes | A   | yes | +    | n.d. | n.d. | n.d. |
| 3-017 | DNMT3A | chr2      | 25234373  | 23/23                     | ENST00000321117.7:c.2645G>A        | ENSP00000324375.5.p.Arg882His         | yes | yes | yes | A   | yes | +    | n.d. | n.d. | n.d. |
|       | FLT3   | chr13     | 28018505  | 20/24                     | ENST00000241453.9:c.2503G>T        | ENSP00000241453.7.p.Asp835Tyr         | yes | yes | no  | A   | yes | +    | n.d. | n.d. | n.d. |
|       | IDH1   | chr2      | 208251458 | 3/10                      | ENST00000345146.4:c.94T>G          | ENSP00000260985.2.p.Phe32Val          | no  | yes | yes | B   | no  | +    | n.d. | n.d. | n.d. |
|       | RUNX1  | chr21     | 34792448  | 8/8                       | ENST00000300305.5:c.1129dup        | ENSP00000300305.3.p.Tyr377LeufsTer223 | no  | no  | no  | C   | yes | +    | n.d. | n.d. | n.d. |
|       | RUNX1  | chr21     | 34887027  | 3/8                       | ENST00000300305.5:c.167T>C         | ENSP00000300305.3.p.Leu56Ser          | no  | yes | yes | B   | no  | +    | n.d. | n.d. | n.d. |
|       | TET2   | chr4      | 105234763 | 3/11                      | ENST00000380013.6:c.822del         | ENSP00000369351.4.p.Asn275IlefsTer18  | no  | yes | no  | B   | yes | +    | n.d. | n.d. | n.d. |
|       | TET2   | chr4      | 105259626 | 7/11                      | ENST00000380013.6:c.3812dup        | ENSP00000369351.4.p.Cys1271TrpfsTer29 | no  | yes | no  | B   | yes | +    | n.d. | n.d. | n.d. |
| NRAS  | chr1   | 114716123 | 2/7       | ENST00000369535.4:c.38G>A | ENSP00000358548.4.p.Gly13Asp       | yes                                   | yes | no  | A   | yes | +   | n.d. | n.d. | n.d. |      |
| 3-018 | IDH1   | chr2      | 208248388 | 4/10                      | ENST00000345146.4:c.395G>A         | ENSP00000260985.2.p.Arg132His         | yes | yes | yes | A   | yes | +    | n.d. | n.d. | n.d. |
| 3-019 | DNMT3A | chr2      | 25244259  | 15/23                     | ENST00000321117.7:c.1747T>A        | ENSP00000324375.5.p.Cys583Ser         | no  | no  | no  | C   | no  | -    | +    | n.d. | n.d. |
|       | FLT3   | chr13     | 28035621  | 12/24                     | ENST00000241453.9:c.1471G>T        | ENSP00000241453.7.p.Val491Leu         | no  | yes | no  | B   | no  | +    | n.d. | n.d. | n.d. |
|       | NPM1   | chr5      | 171410539 | 12/12                     | ENST00000517671.3:c.860_863dup     | ENSP00000428755.1.p.Trp288CysfsTer12  | yes | yes | no  | A   | yes | +    | n.d. | n.d. | n.d. |
|       | NRAS   | chr1      | 114716126 | 2/7                       | ENST00000369535.4:c.35G>A          | ENSP00000358548.4.p.Gly12Asp          | yes | yes | no  | A   | yes | +    | n.d. | n.d. | n.d. |
| 3-020 | DNMT3A | chr2      | 25234308  | 23/23                     | ENST00000321117.7:c.2710C>A        | ENSP00000324375.5.p.Pro904Thr         | no  | yes | no  | B   | no  | +    | n.d. | n.d. | n.d. |
|       | ASXL1  | chr20     | 32435669  | 13/13                     | ENST00000375687.6:c.2957A>G        | ENSP00000364839.4.p.Asn986Ser         | yes | yes | yes | A   | no  | +    | n.d. | n.d. | n.d. |
|       | NPM1   | chr5      | 171410539 | 12/12                     | ENST00000517671.3:c.860_863dup     | ENSP00000428755.1.p.Trp288CysfsTer12  | yes | yes | no  | A   | yes | +    | n.d. | n.d. | n.d. |
|       | IDH2   | chr15     | 90087472  | 6/11                      | ENST00000330062.5:c.782G>A         | ENSP00000331897.3.p.Arg261His         | no  | no  | yes | D   | no  | +    | n.d. | n.d. | n.d. |
|       | NRAS   | chr1      | 114716126 | 2/7                       | ENST00000369535.4:c.35G>A          | ENSP00000358548.4.p.Gly12Asp          | yes | yes | no  | A   | yes | +    | n.d. | n.d. | n.d. |
| 3-021 | DNMT3A | chr2      | 25234413  | 23/23                     | ENST00000321117.7:c.2604del        | ENSP00000324375.5.p.Phe868LeufsTer13  | no  | no  | no  | C   | yes | -    | +    | n.d. | n.d. |
|       | NPM1   | chr5      | 171410539 | 12/12                     | ENST00000517671.3:c.860_863dup     | ENSP00000428755.1.p.Trp288CysfsTer12  | yes | yes | no  | A   | yes | +    | n.d. | n.d. | n.d. |
|       | IDH2   | chr15     | 90088702  | 4/11                      | ENST00000330062.5:c.419G>A         | ENSP00000331897.3.p.Arg140Gln         | yes | yes | yes | A   | yes | +    | n.d. | n.d. | n.d. |
| 3-022 | NRAS   | chr1      | 114713908 | 3/7                       | ENST00000369535.4:c.182A>G         | ENSP00000358548.4.p.Gln61Arg          | yes | yes | no  | A   | yes | +    | n.d. | n.d. | n.d. |
| 3-023 | TET2   | chr4      | 105261769 | 8/11                      | ENST00000380013.6:c.3965T>G        | ENSP00000369351.4.p.Leu1322Arg        | no  | yes | no  | B   | yes | +    | n.d. | n.d. | n.d. |
|       | NPM1   | chr5      | 171410540 | 12/12                     | ENST00000517671.3:c.863_864insCCTG | ENSP00000428755.1.p.Trp288CysfsTer12  | yes | yes | no  | A   | yes | +    | n.d. | n.d. | n.d. |
|       | IDH2   | chr15     | 90088702  | 4/11                      | ENST00000330062.5:c.419G>A         | ENSP00000331897.3.p.Arg140Gln         | yes | yes | yes | A   | yes | +    | n.d. | n.d. | n.d. |
| 3-024 | TP53   | chr17     | 7674259   | 7/11                      | ENST00000269305.6:c.704A>G         | ENSP00000269305.4.p.Asn235Ser         | no  | yes | yes | B   | no  | +    | n.d. | n.d. | n.d. |
|       | ASXL1  | chr20     | 32434599  | 13/13                     | ENST00000375687.6:c.1900_1922del   | ENSP00000364839.4.p.Glu635ArgfsTer15  | yes | yes | no  | A   | yes | -    | +    | n.d. | n.d. |
| 3-025 | CEBPA  | chr19     | 33301825  | 1/1                       | ENST00000498907.2:c.584_589dup     | ENSP00000427514.1.p.His195_Pro196dup  | no  | no  | no  | C   | no  | -    | -    | +    | n.d. |



|       |        |       |           |       |                                    |                                                              |     |     |     |   |     |   |      |      |      |
|-------|--------|-------|-----------|-------|------------------------------------|--------------------------------------------------------------|-----|-----|-----|---|-----|---|------|------|------|
| 3-026 | WT1    | chr11 | 32396361  | 7/10  | ENST00000332351.5:c.1141_1144dup   | ENSP00000331327.3.p.Ala382ValfsTer4                          | no  | yes | no  | B | yes | - | -    | +    | n.d. |
| 3-027 | FLT3   | chr13 | 28034125  | 14/24 | ENST00000241453.9:c.1770_1793dup   | ENSP00000241453.7.p.Tyr597_Glu598insAspTyrValAspPheArgGluTyr | yes | yes | no  | A | no  | + | n.d. | n.d. | n.d. |
|       | NPM1   | chr5  | 171410540 | 12/12 | ENST00000517671.3:c.863_864insCCTG | ENSP00000428755.1.p.Trp288CysfsTer12                         | yes | yes | no  | A | yes | + | n.d. | n.d. | n.d. |
| 3-029 | IDH2   | chr15 | 90084321  | 11/11 | ENST00000330062.5:c.1304C>T        | ENSP00000331897.3.p.Trp435Met                                | no  | no  | yes | D | no  | + | n.d. | n.d. | n.d. |
| 3-030 | ASXL1  | chr20 | 32434733  | 13/13 | ENST00000375687.6:c.2024dup        | ENSP00000364839.4.p.Glu676Ter                                | yes | no  | no  | C | yes | + | n.d. | n.d. | n.d. |
|       | IDH2   | chr15 | 90088702  | 4/11  | ENST00000330062.5:c.419G>A         | ENSP00000331897.3.p.Arg140Gln                                | yes | yes | yes | A | yes | + | n.d. | n.d. | n.d. |
| 3-031 | FLT3   | chr13 | 28049450  | 8/24  | ENST00000241453.9:c.970G>A         | ENSP00000241453.7.p.Asp324Asn                                | no  | yes | yes | B | no  | + | n.d. | n.d. | n.d. |
|       | RUNX1  | chr21 | 34886881  | 3/8   | ENST00000300305.5:c.313C>A         | ENSP00000300305.3.p.His105Asn                                | no  | no  | no  | C | no  | + | n.d. | n.d. | n.d. |
| 3-032 | RUNX1  | chr21 | 34887027  | 3/8   | ENST00000300305.5:c.167T>C         | ENSP00000300305.3.p.Leu56Ser                                 | no  | yes | yes | B | no  | + | n.d. | n.d. | n.d. |
|       | NPM1   | chr5  | 171410542 | 12/12 | ENST00000517671.3:c.863_864insCCGG | ENSP00000428755.1.p.Trp288CysfsTer12                         | yes | yes | no  | A | yes | + | n.d. | n.d. | n.d. |
|       | CEBPA  | chr19 | 33301825  | 1/1   | ENST00000498907.2:c.584_589dup     | ENSP00000427514.1.p.His195_Pro196dup                         | no  | no  | no  | C | no  | - | +    | n.d. | n.d. |
| 3-034 | IDH1   | chr2  | 208248389 | 4/10  | ENST00000345146.4:c.394C>T         | ENSP00000260985.2.p.Arg132Cys                                | yes | yes | yes | A | yes | + | n.d. | n.d. | n.d. |
|       | TET2   | chr4  | 105275662 | 11/11 | ENST00000380013.6:c.5152G>T        | ENSP00000369351.4.p.Val1718Leu                               | no  | yes | yes | B | no  | + | n.d. | n.d. | n.d. |
|       | NPM1   | chr5  | 171410539 | 12/12 | ENST00000517671.3:c.860_863dup     | ENSP00000428755.1.p.Trp288CysfsTer12                         | yes | yes | no  | A | yes | + | n.d. | n.d. | n.d. |
|       | CEBPA  | chr19 | 33302176  | 1/1   | ENST00000498907.2:c.238dup         | ENSP00000427514.1.p.Asp80GlyfsTer28                          | no  | yes | no  | B | yes | + | n.d. | n.d. | n.d. |
| 3-035 | IDH1   | chr2  | 208248389 | 4/10  | ENST00000345146.4:c.394C>A         | ENSP00000260985.2.p.Arg132Ser                                | yes | yes | yes | A | yes | + | n.d. | n.d. | n.d. |
|       | NPM1   | chr5  | 171410539 | 12/12 | ENST00000517671.3:c.860_863dup     | ENSP00000428755.1.p.Trp288CysfsTer12                         | yes | yes | no  | A | yes | + | n.d. | n.d. | n.d. |
|       | CEBPA  | chr19 | 33301984  | 1/1   | ENST00000498907.2:c.430dup         | ENSP00000427514.1.p.Glu144GlyfsTer26                         | no  | no  | no  | C | yes | + | n.d. | n.d. | n.d. |
| 3-037 | DNMT3A | chr2  | 25300227  | 3/23  | ENST00000321117.7:c.89A>C          | ENSP00000324375.5.p.Glu30Ala                                 | no  | yes | yes | B | no  | - | +    | n.d. | n.d. |
|       | NPM1   | chr5  | 171410539 | 12/12 | ENST00000517671.3:c.860_863dup     | ENSP00000428755.1.p.Trp288CysfsTer12                         | yes | yes | no  | A | yes | + | n.d. | n.d. | n.d. |
|       | IDH2   | chr15 | 90088702  | 4/11  | ENST00000330062.5:c.419G>A         | ENSP00000331897.3.p.Arg140Gln                                | yes | yes | yes | A | yes | + | n.d. | n.d. | n.d. |
| 3-038 | DNMT3A | chr2  | 25239194  | 20/23 | ENST00000321117.7:c.2340_2343del   | ENSP00000324375.5.p.Ile780MetfsTer21                         | no  | no  | no  | C | yes | + | n.d. | n.d. | n.d. |
|       | IDH2   | chr15 | 90088702  | 4/11  | ENST00000330062.5:c.419G>A         | ENSP00000331897.3.p.Arg140Gln                                | yes | yes | yes | A | yes | + | n.d. | n.d. | n.d. |
| 3-039 | FLT3   | chr13 | 28028243  | 16/24 | ENST00000241453.9:c.1988A>G        | ENSP00000241453.7.p.Lys663Arg                                | no  | yes | no  | B | no  | + | n.d. | n.d. | n.d. |
| 3-040 | DNMT3A | chr2  | 25246023  | 12/23 | ENST00000321117.7:c.1470dup        | ENSP00000324375.5.p.Glu491Ter                                | no  | no  | no  | C | yes | - | -    | +    | n.d. |
|       | IDH2   | chr15 | 90088606  | 4/11  | ENST00000330062.5:c.515G>A         | ENSP00000331897.3.p.Arg172Lys                                | yes | yes | yes | A | yes | + | n.d. | n.d. | n.d. |
| 3-041 | DNMT3A | chr2  | 25234373  | 23/23 | ENST00000321117.7:c.2645G>A        | ENSP00000324375.5.p.Arg882His                                | yes | yes | yes | A | yes | + | n.d. | n.d. | n.d. |
|       | NPM1   | chr5  | 171410539 | 12/12 | ENST00000517671.3:c.860_863dup     | ENSP00000428755.1.p.Trp288CysfsTer12                         | yes | yes | no  | A | yes | + | n.d. | n.d. | n.d. |
| 3-042 | TET2   | chr4  | 105236554 | 3/11  | ENST00000380013.6:c.2613dup        | ENSP00000369351.4.p.Val872CysfsTer29                         | no  | no  | no  | C | yes | + | n.d. | n.d. | n.d. |
|       | TET2   | chr4  | 105269725 | 9/11  | ENST00000380013.6:c.4160A>G        | ENSP00000369351.4.p.Asn1387Ser                               | no  | no  | no  | C | yes | + | n.d. | n.d. | n.d. |
|       | TET2   | chr4  | 105272692 | 10/11 | ENST00000380013.6:c.4317dup        | ENSP00000369351.4.p.Arg1440ThrfsTer38                        | no  | no  | no  | C | yes | + | n.d. | n.d. | n.d. |
|       | ASXL1  | chr20 | 32434789  | 13/13 | ENST00000375687.6:c.2077C>T        | ENSP00000364839.4.p.Arg693Ter                                | yes | yes | yes | A | yes | + | n.d. | n.d. | n.d. |
|       | CEBPA  | chr19 | 33302346  | 1/1   | ENST00000498907.2:c.68dup          | ENSP00000427514.1.p.His24AlafsTer84                          | no  | yes | yes | B | yes | + | n.d. | n.d. | n.d. |

<sup>1</sup> Number of read pairs were downscaled for each sample to 47.5, 40, 30 and 20 million. HAMLET was first run on all samples with 20 million read pairs followed by analysis with 30, 40 and 47.5 million read pairs for those variants that were not detected with 20 million read pairs. The sequential analysis was stopped upon detection of the variant. Variants that are detected (+) are indicated in blue, while variants that are not detected (-) are shown in orange.

Variants indicated in yellow are nonsense variants or frameshift variants with a premature stop codon that are potential targets for nonsense mediated decay. n.d.; not determined.

<sup>2</sup> Position of the variant in the GRCh38 human genome.

<sup>3</sup> Exon location of the variant / total number of exons of the gene.

<sup>4</sup> HGVS<sub>c</sub>; coding sequence name as identified by the Human Genome Variation Society (<http://www.hgvs.org/>).

<sup>5</sup> HGVS<sub>p</sub>; protein sequence name as identified by the Human Genome Variation Society (<http://www.hgvs.org/>).

<sup>6</sup> HS; indicated whether the variant occurs in a hotspot (HS) region as identified in Table SVI.

<sup>7</sup> COS; indicated whether the variant is known as cancer mutation in COSMIC (catalogue of somatic mutations in cancer; <http://cancer.sanger.ac.uk/cosmic>).

<sup>8</sup> SNP; indicated whether the variant is known as single nucleotide polymorphism in dbSNP (<https://www.ncbi.nlm.nih.gov/projects/SNP>).

<sup>9</sup> Class; A, hotspot variant known in COSMIC (known or unknown as SNP); B, variant not in a hotspot but known in COSMIC (known or unknown as SNP); C, variant unknown in COSMIC and unknown as SNP; D, variant unknown in COSMIC and known as SNP.

<sup>10</sup> Jaiswal; indicated whether the variant is a recurrent mutation in myeloid malignancies by Jaiswal *et al.* (NEJM 2017).

**Table SXII. Detection of *FLT3*-ITD by ReSCU (Reciprocal Soft Clip Utilization)<sup>1</sup>.**

| AML   | med cov ex14-15 <sup>2</sup> | med cov up itd <sup>3</sup> | med cov itd <sup>4</sup> | med cov down itd <sup>5</sup> | itd start <sup>6</sup> | itd end <sup>7</sup> | ltd length <sup>8</sup> | sc start count <sup>9</sup> | % sc start count <sup>10</sup> | sc end count <sup>11</sup> | % sc end count <sup>12</sup> | sc start pos <sup>13</sup> | sc start recipr pos <sup>14</sup> | sc end pos <sup>15</sup> | sc end recipr pos <sup>16</sup> | boundary type <sup>17</sup> | fuzziness <sup>18</sup> | Validation <sup>19</sup> | diagnostic PCR <sup>20</sup> |
|-------|------------------------------|-----------------------------|--------------------------|-------------------------------|------------------------|----------------------|-------------------------|-----------------------------|--------------------------------|----------------------------|------------------------------|----------------------------|-----------------------------------|--------------------------|---------------------------------|-----------------------------|-------------------------|--------------------------|------------------------------|
| 1-002 | 1456                         | 1571                        | 1417                     | 1465                          | 1815                   | 1868                 | 54                      | 52                          | 3.6                            | 58                         | 4.0                          | 1814                       | 1868                              | 1869                     | 1815                            | exact                       | 0                       | yes                      | pos                          |
| 1-003 | 2025                         | 1964                        | 2230                     | 2003                          | 1807                   | 1875                 | 69                      | 245                         | 12.5                           | 272                        | 13.8                         | 1806                       | 1875                              | 1876                     | 1807                            | exact                       | 0                       | yes                      | pos                          |
|       | 2025                         | 2067                        | 2218                     | 2003                          | 1828,1829              | 1911,1912            | 84                      | 49                          | 2.4                            | 30                         | 1.5                          | 1827                       | 1911                              | 1913                     | 1829                            | fuzzy                       | 1                       | not detected             |                              |
| 2-001 | 681                          | 642                         | 859                      | 678                           | 1859,1863              | 1906,191             | 48                      | 119                         | 17.5                           | 102                        | 15.0                         | 1858                       | 1906                              | 1911                     | 1863                            | fuzzy                       | 4                       | yes                      | pos                          |
| 2-006 | 1258                         | 1072                        | 1131                     | 1274                          | 1857,1861              | 1877,1881            | 21                      | 154                         | 12.2                           | 141                        | 11.2                         | 1856                       | 1877                              | 1882                     | 1861                            | fuzzy                       | 4                       | yes                      | pos                          |
| 2-012 | 815                          | 808                         | 761                      | 819                           | 1859,1861              | 1870,1872            | 12                      | 15                          | 1.8                            | 12                         | 1.5                          | 1858                       | 1870                              | 1873                     | 1861                            | fuzzy                       | 2                       | yes                      | pos                          |
| 2-013 | 702                          | 647                         | 704                      | 713                           | 1821,1824              | 1883                 | 63                      | 92                          | 13.1                           | 69                         | 9.8                          | 1823                       | 1883                              | 1884                     | 1821                            | fuzzy-start                 | 3                       | yes                      | pos                          |
|       | 702                          | 599                         | 706                      | 713                           | 1824,1828              | 1883                 | 60                      | 92                          | 13.1                           | 4                          | 0.6                          | 1823                       | 1883                              | 1884                     | 1828                            | fuzzy-start                 | 4                       | not detected             |                              |
| 2-014 | 403                          | -                           | -                        | -                             | -                      | -                    | -                       | -                           | -                              | -                          | -                            | -                          | -                                 | -                        | -                               | -                           | -                       | -                        | neg                          |
| 2-015 | 1050                         | 1062                        | 1234                     | 1039                          | 1824                   | 1874                 | 51                      | 196                         | 18.7                           | 157                        | 15.0                         | 1823                       | 1874                              | 1875                     | 1824                            | exact                       | 0                       | yes                      | pos                          |
| 2-016 | 972                          | 678                         | 1113                     | 712                           | 1803                   | 1918                 | 116                     | 238                         | 24.5                           | 245                        | 25.2                         | 1802                       | 1918                              | 1919                     | 1803                            | exact                       | 0                       | not detected             | pos                          |
| 2-018 | 1104                         | 1262                        | 987                      | 1122                          | 1824                   | 1874                 | 51                      | 14                          | 1.3                            | 7                          | 0.6                          | 1823                       | 1874                              | 1875                     | 1824                            | exact                       | 0                       | yes                      | pos                          |
|       | 1104                         | 1088                        | 1024                     | 1126                          | 1862                   | 1885                 | 24                      | 175                         | 15.9                           | 153                        | 13.9                         | 1861                       | 1885                              | 1886                     | 1862                            | exact                       | 0                       | yes                      |                              |
| 2-023 | 2472                         | 2247                        | 2905                     | 2481                          | 1830,1831              | 1883,1884            | 54                      | 17                          | 0.7                            | 10                         | 0.4                          | 1829                       | 1883                              | 1885                     | 1831                            | fuzzy                       | 1                       | yes                      | pos                          |
|       | 2472                         | 2233                        | 2946                     | 2472                          | 1833                   | 1871                 | 39                      | 523                         | 21.2                           | 313                        | 12.7                         | 1832                       | 1871                              | 1872                     | 1833                            | exact                       | 0                       | yes                      |                              |
| 2-028 | 641                          | 674                         | 682                      | 629                           | 1863                   | 1919,1922            | 60                      | 3                           | 0.5                            | 6                          | 0.9                          | 1862                       | 1922                              | 1920                     | 1863                            | fuzzy-end                   | 3                       | -                        | neg                          |
| 2-029 | 2228                         | 1848                        | 3243                     | 2199                          | 1843,1847              | 1911,1915            | 69                      | 848                         | 38.1                           | 588                        | 26.4                         | 1842                       | 1911                              | 1916                     | 1847                            | fuzzy                       | 4                       | yes                      | pos                          |
| 2-030 | 1048                         | 1083                        | 1318                     | 1030                          | 1810,1813              | 1875,1877            | 66                      | 215                         | 20.5                           | 199                        | 19.0                         | 1812                       | 1877                              | 1876                     | 1810                            | fuzzy                       | 3                       | yes                      | pos                          |
| 2-031 | 558                          | 541                         | 533                      | 560                           | 1830                   | 1874                 | 45                      | 6                           | 1.1                            | 4                          | 0.7                          | 1829                       | 1874                              | 1875                     | 1830                            | exact                       | 0                       | yes                      | pos                          |
|       | 558                          | 534                         | 529                      | 560                           | 1861                   | 1874                 | 14                      | 6                           | 1.1                            | 14                         | 2.5                          | 1860                       | 1874                              | 1875                     | 1861                            | exact                       | 0                       | yes                      |                              |
| 2-032 | 1004                         | 1031                        | 1066                     | 983                           | 1861                   | 1874                 | 14                      | 111                         | 11.1                           | 124                        | 12.4                         | 1860                       | 1874                              | 1875                     | 1861                            | exact                       | 0                       | yes                      | pos                          |
| 2-033 | 1432                         | 1583                        | 1369                     | 1432                          | 1828,1829              | 1872,1873            | 45                      | 13                          | 0.9                            | 9                          | 0.6                          | 1827                       | 1872                              | 1874                     | 1829                            | fuzzy                       | 1                       | yes                      | pos                          |
|       | 1432                         | 1431                        | 1429                     | 1434                          | 1860                   | 1883                 | 24                      | 326                         | 22.8                           | 280                        | 19.6                         | 1859                       | 1883                              | 1884                     | 1860                            | exact                       | 0                       | yes                      |                              |
| 2-035 | 1702                         | 1722                        | 1800                     | 1684                          | 1857                   | 1874                 | 18                      | 261                         | 15.3                           | 265                        | 15.6                         | 1856                       | 1874                              | 1875                     | 1857                            | exact                       | 0                       | yes                      | pos                          |
| 2-036 | 2704                         | 2769                        | 2930                     | 2653                          | 1812                   | 1868                 | 57                      | 39                          | 1.4                            | 26                         | 1.0                          | 1811                       | 1868                              | 1869                     | 1812                            | exact                       | 0                       | not detected             | pos                          |
|       | 2704                         | 2766                        | 2931                     | 2621                          | 1813                   | 1909                 | 97                      | 277                         | 10.2                           | 231                        | 8.5                          | 1812                       | 1909                              | 1910                     | 1813                            | exact                       | 0                       | not detected             |                              |
|       | 2704                         | 2881                        | 3207                     | 2631                          | 1875                   | 1891                 | 17                      | 9                           | 0.3                            | 4                          | 0.1                          | 1874                       | 1891                              | 1892                     | 1875                            | exact                       | 0                       | yes                      |                              |
| 2-040 | 2117                         | 1805                        | 2689                     | 2091                          | 1843                   | 1919                 | 77                      | 422                         | 19.9                           | 341                        | 16.1                         | 1842                       | 1919                              | 1920                     | 1843                            | exact                       | 0                       | not detected             | pos                          |
| 2-045 | 379                          | 394                         | 353                      | 394                           | 1856                   | 1882                 | 27                      | 4                           | 1.1                            | 3                          | 0.8                          | 1855                       | 1882                              | 1883                     | 1856                            | exact                       | 0                       | yes                      | pos                          |
|       | 379                          | 347                         | 378                      | 390                           | 1857,1859              | 1919,1921            | 63                      | 14                          | 3.7                            | 8                          | 2.1                          | 1858                       | 1921                              | 1920                     | 1857                            | fuzzy                       | 2                       | not detected             |                              |
| 2-046 | 656                          | 589                         | 772                      | 651                           | 1836,1840              | 1900,1905            | 65                      | 106                         | 16.2                           | 85                         | 13.0                         | 1839                       | 1905                              | 1901                     | 1836                            | fuzzy                       | 5                       | yes                      | pos                          |
| 2-049 | 630                          | 714                         | 641                      | 612                           | 1818                   | 1875,1877            | 60                      | 22                          | 3.5                            | 13                         | 2.1                          | 1817                       | 1877                              | 1876                     | 1818                            | fuzzy-end                   | 2                       | yes                      | pos                          |

|       |      |      |      |      |           |           |     |     |      |     |      |      |      |      |      |           |   |              |     |
|-------|------|------|------|------|-----------|-----------|-----|-----|------|-----|------|------|------|------|------|-----------|---|--------------|-----|
| 2-052 | 226  | 223  | 238  | 222  | 1800      | 1918,1920 | 121 | 3   | 1.3  | 5   | 2.2  | 1799 | 1920 | 1919 | 1800 | fuzzy-end | 2 | not detected | pos |
|       | 226  | 226  | 276  | 223  | 1863      | 1918      | 56  | 13  | 5.6  | 17  | 7.5  | 1862 | 1918 | 1919 | 1863 | exact     | 0 | yes          |     |
| 3-005 | 525  | 512  | 613  | 522  | 1823,1824 | 1861,1862 | 39  | 95  | 18.1 | 60  | 11.4 | 1822 | 1861 | 1863 | 1824 | fuzzy     | 1 | yes          | pos |
| 3-009 | 1780 | 1678 | 1601 | 1811 | 1828,1829 | 1872,1873 | 45  | 7   | 0.4  | 3   | 0.2  | 1827 | 1872 | 1874 | 1829 | fuzzy     | 1 | not detected | pos |
| 3-011 | 965  | 806  | 1055 | 978  | 1853,1854 | 1885,1886 | 33  | 221 | 22.9 | 170 | 17.9 | 1852 | 1885 | 1887 | 1854 | fuzzy     | 1 | yes          | pos |
| 3-012 | 1705 | 1454 | 2168 | 1695 | 1815      | 1859      | 45  | 678 | 39.8 | 364 | 22.3 | 1814 | 1859 | 1860 | 1815 | exact     | 0 | yes          | pos |
| 3-017 | 1029 | 972  | 1074 | 1045 | 1865,1866 | 1918,1919 | 54  | 5   | 0.5  | 4   | 0.4  | 1864 | 1918 | 1920 | 1866 | fuzzy     | 1 | -            | neg |
| 3-020 | 455  | 439  | 477  | 454  | 1825      | 1919,1923 | 99  | 12  | 2.6  | 10  | 2.2  | 1824 | 1923 | 1920 | 1825 | fuzzy-end | 4 | not detected | pos |
| 3-026 | 1366 | 1345 | 1626 | 1356 | 1828,1829 | 1878,1879 | 51  | 247 | 18.1 | 137 | 10.0 | 1827 | 1878 | 1880 | 1829 | fuzzy     | 1 | yes          | pos |
| 3-027 | 2201 | 2164 | 2066 | 2206 | 1825      | 1872      | 48  | 9   | 0.4  | 10  | 0.5  | 1824 | 1872 | 1873 | 1825 | exact     | 0 | not detected | pos |
|       | 2201 | 2164 | 2066 | 2206 | 1825,1827 | 1868,1872 | 48  | 9   | 0.4  | 3   | 0.1  | 1824 | 1872 | 1869 | 1827 | fuzzy     | 4 | not detected |     |
|       | 2201 | 2099 | 1857 | 2206 | 1831,1832 | 1860,1861 | 30  | 7   | 0.3  | 4   | 0.2  | 1830 | 1860 | 1862 | 1832 | fuzzy     | 1 | not detected |     |
|       | 2201 | 2064 | 2219 | 2206 | 1851      | 1871      | 21  | 8   | 0.4  | 4   | 0.2  | 1850 | 1871 | 1872 | 1851 | exact     | 0 | yes          |     |
|       | 2201 | 2064 | 2216 | 2207 | 1851      | 1871,1874 | 24  | 298 | 13.5 | 229 | 10.4 | 1850 | 1874 | 1872 | 1851 | fuzzy-end | 3 | yes          |     |
|       | 2201 | 2064 | 2216 | 2207 | 1851      | 1874      | 24  | 298 | 13.5 | 229 | 10.4 | 1850 | 1874 | 1875 | 1851 | exact     | 0 | yes          |     |
| 3-028 | 1957 | 1596 | 2452 | 1948 | 1843,1847 | 1911,1915 | 69  | 486 | 24.8 | 310 | 15.8 | 1842 | 1911 | 1916 | 1847 | fuzzy     | 4 | yes          | pos |
| 3-035 | 836  | 687  | 823  | 873  | 1861,1863 | 1914,1916 | 54  | 14  | 1.7  | 9   | 1.1  | 1860 | 1914 | 1917 | 1863 | fuzzy     | 2 | yes          | pos |
|       | 836  | 687  | 776  | 871  | 1868      | 1887      | 20  | 32  | 3.8  | 33  | 3.9  | 1867 | 1887 | 1888 | 1868 | exact     | 0 | yes          |     |
| 3-037 | 1187 | 941  | 1341 | 1183 | 1826      | 1874      | 49  | 194 | 16.3 | 111 | 9.4  | 1825 | 1874 | 1875 | 1826 | exact     | 0 | yes          | pos |
|       | 1187 | 1046 | 1205 | 1177 | 1853,1855 | 1919,1922 | 68  | 12  | 1.0  | 6   | 0.5  | 1854 | 1922 | 1920 | 1853 | fuzzy     | 3 | not detected |     |
| 3-039 | 1894 | 1706 | 1712 | 1912 | 1865      | 1891      | 27  | 5   | 0.3  | 4   | 0.2  | 1864 | 1891 | 1892 | 1865 | exact     | 0 | not detected | pos |
| 3-041 | 787  | 718  | 799  | 791  | 1816      | 1860      | 45  | 135 | 17.2 | 95  | 12.1 | 1815 | 1860 | 1861 | 1816 | exact     | 0 | yes          | pos |

<sup>1</sup> In ReSCU, RNAseq reads that partially align with the *FLT3* primary gene transcript ENST00000241453 are selected as soft-clipped (SC) reads. The positions of the SC indicate the start and end of the ITD. SC reads aligning to exon 14-15 of the *FLT3* transcript (1787-2024 base pair region of the transcript corresponding to 1705-1942 base pair region in the coding sequence) are extracted and analyzed for reciprocity. Reciprocal events are detected when SC regions of reads at the start of the ITD align with transcript regions at the end of the ITD, and vice versa. Samples are called positive for *FLT3*-ITD upon detection of reciprocal events.

<sup>2</sup> median number of reads at each base pair in exon 14-15.

<sup>3</sup> median number of reads at each base pair in exon 14-15 upstream of the ITD as determined by the positions of SC.

<sup>4</sup> median number of reads at each base pair in the ITD as determined by the positions of SC.

<sup>5</sup> median number of reads at each base pair in exon 14-15 downstream of the ITD as determined by the positions of SC.

<sup>6</sup> Start of ITD as determined by the position of the SC +1.

<sup>7</sup> End of ITD as determined by the position of the SC -1.

<sup>8</sup> Length of the ITD as determined the position s of SCs.

<sup>9</sup> SC read counts at start of the ITD.

<sup>10</sup> Percentage of SC reads of median number of reads at each base pair in exon 14-15 at start of the ITD.

<sup>11</sup> SC read counts at end of the ITD.

- <sup>12</sup> Percentage of SC reads of median number of reads at each base pair in exon 14-15 at end of the ITD.
- <sup>13</sup> Position of the SC at start of the ITD.
- <sup>14</sup> Position of the reciprocal event after alignment of the SC region of reads at start of the ITD.
- <sup>15</sup> Position of the SC at end of the ITD.
- <sup>16</sup> Position of the reciprocal event after alignment of the SC region of reads at end of the ITD.
- <sup>17</sup> Indicated whether the position of the SC at start and/or end of the ITD is exact or fuzzy.
- <sup>18</sup> Number of possible bases for the position of the SC at start and/or end of the ITD.
- <sup>19</sup> Validation of the presence, position and length of the ITD by MiSeq NGS.
- <sup>20</sup> Presence and position of the ITD was validated, but the length of the ITD was too long to determine by NGS.
- <sup>21</sup> Diagnostic results for *FLT3*-ITD as measured by PCR on genomic DNA followed by electrophoretic fragment size analysis.

**Table SXIII. Sensitivity of HAMLET to detect *FLT3*-ITD at different sequencing depths<sup>1</sup>.**

| AML   | itd start <sup>2</sup> | itd end <sup>3</sup> | ltd length <sup>4</sup> | % sc start count <sup>5</sup> | % sc end count <sup>6</sup> | 20M | 30M  | 40M  | 47.5M |
|-------|------------------------|----------------------|-------------------------|-------------------------------|-----------------------------|-----|------|------|-------|
| 1-002 | 1815                   | 1868                 | 54                      | 3.6                           | 4.0                         | +   | n.d. | n.d. | n.d.  |
| 1-003 | 1807                   | 1875                 | 69                      | 12.5                          | 13.8                        | +   | n.d. | n.d. | n.d.  |
|       | 1828,1829              | 1911,1912            | 84                      | 2.4                           | 1.5                         | +   | n.d. | n.d. | n.d.  |
| 2-001 | 1859,1863              | 1906,191             | 48                      | 17.5                          | 15.0                        | +   | n.d. | n.d. | n.d.  |
| 2-006 | 1857,1861              | 1877,1881            | 21                      | 12.2                          | 11.2                        | +   | n.d. | n.d. | n.d.  |
| 2-012 | 1859,1861              | 1870,1872            | 12                      | 1.8                           | 1.5                         | +   | n.d. | n.d. | n.d.  |
| 2-013 | 1821,1824              | 1883                 | 63                      | 13.1                          | 9.8                         | +   | n.d. | n.d. | n.d.  |
|       | 1824,1828              | 1883                 | 60                      | 13.1                          | 0.6                         | +   | n.d. | n.d. | n.d.  |
| 2-015 | 1824                   | 1874                 | 51                      | 18.7                          | 15.0                        | +   | n.d. | n.d. | n.d.  |
| 2-016 | 1803                   | 1918                 | 116                     | 24.5                          | 25.2                        | +   | n.d. | n.d. | n.d.  |
| 2-018 | 1824                   | 1874                 | 51                      | 1.3                           | 0.6                         | +   | n.d. | n.d. | n.d.  |
|       | 1862                   | 1885                 | 24                      | 15.9                          | 13.9                        | +   | n.d. | n.d. | n.d.  |
| 2-023 | 1830,1831              | 1883,1884            | 54                      | 0.7                           | 0.4                         | -   | +    | n.d. | n.d.  |
|       | 1833                   | 1871                 | 39                      | 21.2                          | 12.7                        | +   | n.d. | n.d. | n.d.  |
| 2-028 | 1863                   | 1919,1922            | 60                      | 0.5                           | 0.9                         | -   | +    | n.d. | n.d.  |
| 2-029 | 1843,1847              | 1911,1915            | 69                      | 38.1                          | 26.4                        | +   | n.d. | n.d. | n.d.  |
| 2-030 | 1810,1813              | 1875,1877            | 66                      | 20.5                          | 19.0                        | +   | n.d. | n.d. | n.d.  |
| 2-031 | 1830                   | 1874                 | 45                      | 1.1                           | 0.7                         | -   | -    | -    | +     |
|       | 1861                   | 1874                 | 14                      | 1.1                           | 2.5                         | -   | -    | -    | +     |
| 2-032 | 1861                   | 1874                 | 14                      | 11.1                          | 12.4                        | +   | n.d. | n.d. | n.d.  |
| 2-033 | 1828,1829              | 1872,1873            | 45                      | 0.9                           | 0.6                         | -   | +    | n.d. | n.d.  |
|       | 1860                   | 1883                 | 24                      | 22.8                          | 19.6                        | +   | n.d. | n.d. | n.d.  |
| 2-035 | 1857                   | 1874                 | 18                      | 15.3                          | 15.6                        | +   | n.d. | n.d. | n.d.  |
| 2-036 | 1812                   | 1868                 | 57                      | 1.4                           | 1.0                         | +   | n.d. | n.d. | n.d.  |
|       | 1813                   | 1909                 | 97                      | 10.2                          | 8.5                         | +   | n.d. | n.d. | n.d.  |
|       | 1875                   | 1891                 | 17                      | 0.3                           | 0.1                         | -   | -    | -    | -     |
| 2-040 | 1843                   | 1919                 | 77                      | 19.9                          | 16.1                        | +   | n.d. | n.d. | n.d.  |
| 2-045 | 1856                   | 1882                 | 27                      | 1.1                           | 0.8                         | -   | -    | -    | +     |
|       | 1857,1859              | 1919,1921            | 63                      | 3.7                           | 2.1                         | -   | -    | +    | n.d.  |
| 2-046 | 1836,1840              | 1900,1905            | 65                      | 16.2                          | 13.0                        | +   | n.d. | n.d. | n.d.  |
| 2-049 | 1818                   | 1875,1877            | 60                      | 3.5                           | 2.1                         | +   | n.d. | n.d. | n.d.  |
| 2-052 | 1800                   | 1918,1920            | 121                     | 1.3                           | 2.2                         | -   | -    | -    | -     |
|       | 1863                   | 1918                 | 56                      | 5.6                           | 7.5                         | -   | -    | +    | n.d.  |
| 3-005 | 1823,1824              | 1861,1862            | 39                      | 18.1                          | 11.4                        | +   | n.d. | n.d. | n.d.  |
| 3-009 | 1828,1829              | 1872,1873            | 45                      | 0.4                           | 0.2                         | -   | -    | -    | -     |
| 3-011 | 1853,1854              | 1885,1886            | 33                      | 22.9                          | 17.9                        | +   | n.d. | n.d. | n.d.  |
| 3-012 | 1815                   | 1859                 | 45                      | 39.8                          | 22.3                        | +   | n.d. | n.d. | n.d.  |
| 3-017 | 1865,1866              | 1918,1919            | 54                      | 0.5                           | 0.4                         | -   | -    | -    | -     |
| 3-020 | 1825                   | 1919,1923            | 99                      | 2.6                           | 2.2                         | +   | n.d. | n.d. | n.d.  |
| 3-026 | 1828,1829              | 1878,1879            | 51                      | 18.1                          | 10.0                        | +   | n.d. | n.d. | n.d.  |
| 3-027 | 1825                   | 1872                 | 48                      | 0.4                           | 0.5                         | -   | +    | n.d. | n.d.  |
|       | 1825,1827              | 1868,1872            | 48                      | 0.4                           | 0.1                         | -   | -    | -    | +     |
|       | 1831,1832              | 1860,1861            | 30                      | 0.3                           | 0.2                         | -   | -    | -    | +     |
|       | 1851                   | 1871                 | 21                      | 0.4                           | 0.2                         | -   | +    | n.d. | n.d.  |
|       | 1851                   | 1871,1874            | 24                      | 13.5                          | 10.4                        | +   | n.d. | n.d. | n.d.  |
|       | 1851                   | 1874                 | 24                      | 13.5                          | 10.4                        | +   | n.d. | n.d. | n.d.  |
| 3-028 | 1843,1847              | 1911,1915            | 69                      | 24.8                          | 15.8                        | +   | n.d. | n.d. | n.d.  |
| 3-035 | 1861,1863              | 1914,1916            | 54                      | 1.7                           | 1.1                         | -   | -    | +    | n.d.  |
|       | 1868                   | 1887                 | 20                      | 3.8                           | 3.9                         | +   | n.d. | n.d. | n.d.  |
| 3-037 | 1826                   | 1874                 | 49                      | 16.3                          | 9.4                         | +   | n.d. | n.d. | n.d.  |
|       | 1853,1855              | 1919,1922            | 68                      | 1.0                           | 0.5                         | -   | -    | -    | -     |
| 3-039 | 1865                   | 1891                 | 27                      | 0.3                           | 0.2                         | -   | -    | -    | -     |

|       |      |      |    |      |      |   |      |      |      |
|-------|------|------|----|------|------|---|------|------|------|
| 3-041 | 1816 | 1860 | 45 | 17.2 | 12.1 | + | n.d. | n.d. | n.d. |
|-------|------|------|----|------|------|---|------|------|------|

<sup>1</sup> Number of read pairs were downscaled for each sample to 47.5, 40, 30 and 20 million. HAMLET was first run on all samples with 20 million read pairs followed by analysis with 30, 40 and 47.5 million read pairs for those *FLT3*-ITDs that were not detected with 20 million read pairs. The sequential analysis was stopped upon detection of the ITD. ITDs that were detected (+) are indicated in blue, and ITDs that were not detected (-) are shown in orange. n.d.; not determined.

<sup>2</sup> Start of ITD as determined by the position of the SC +1.

<sup>3</sup> End of ITD as determined by the position of the SC -1.

<sup>4</sup> Length of the ITD as determined the position s of SCs.

<sup>5</sup> Percentage of SC reads of median number of reads at each base pair in exon 14-15 at start of the ITD.

<sup>6</sup> Percentage of SC reads of median number of reads at each base pair in exon 14-15 at end of the ITD.

**Table SXIV. Diagnostic and NGS results for *FLT3*-ITD.**

| AML   | Diagnostic results <sup>1</sup> |                     |           |          |                       |           |          |          |           |          |          |                            | NGS results <sup>2</sup> |                     |          |        |          |        |                         |
|-------|---------------------------------|---------------------|-----------|----------|-----------------------|-----------|----------|----------|-----------|----------|----------|----------------------------|--------------------------|---------------------|----------|--------|----------|--------|-------------------------|
|       | WT Size                         | WT AUC <sup>3</sup> | MUT1 Size | MUT1 AUC | MUT1 ITD <sup>4</sup> | MUT2 Size | MUT2 AUC | MUT2 ITD | MUT3 Size | MUT3 AUC | MUT3 ITD | Allelic ratio <sup>5</sup> | MUT1 ITD                 | MUT1 % <sup>6</sup> | MUT2 ITD | MUT2 % | MUT3 ITD | MUT3 % | MUT total% <sup>7</sup> |
| 1-002 | 370                             | 97767               | 427       | 5577     | 57                    | -         | -        | -        | -         | -        | -        | 0.1                        | 57                       | 8.2                 | -        | -      | -        | -      | 8.2                     |
| 1-003 | 371                             | 248620              | 440       | 258761   | 69                    | 455       | 31403    | 84       | -         | -        | -        | 1.2                        | 69                       | 36.8                | -        | -      | -        | -      | 36.8                    |
| 2-001 | 371                             | 342838              | 419       | 261321   | 48                    | -         | -        | -        | -         | -        | -        | 0.8                        | 48                       | 64.7                | -        | -      | -        | -      | 64.7                    |
| 2-006 | 372                             | 292394              | 392       | 261599   | 20                    | -         | -        | -        | -         | -        | -        | 0.9                        | 21                       | 82.6                | -        | -      | -        | -      | 82.6                    |
| 2-012 | 371                             | 374172              | 383       | 91292    | 12                    | -         | -        | -        | -         | -        | -        | 0.2                        | 12                       | 30.1                | -        | -      | -        | -      | 30.1                    |
| 2-013 | 371                             | 344935              | 434       | 162441   | 63                    | 424       | 7313     | 53       | -         | -        | -        | 0.5                        | 63                       | 35.1                | -        | -      | -        | -      | 35.1                    |
| 2-015 | 371                             | 223500              | 395       | 6586     | 24                    | 422       | 129805   | 51       | -         | -        | -        | 0.6                        | 24                       | 1.9                 | 51       | 63.3   | -        | -      | 65.2                    |
| 2-016 | 371                             | 72732               | 488       | 368897   | 117                   | -         | -        | -        | -         | -        | -        | 5.1                        | 54                       | 15.7                | 20       | 1.0    | -        | -      | 16.7                    |
| 2-018 | 371                             | 294169              | 395       | 264471   | 24                    | 422       | 11518    | 51       | -         | -        | -        | 0.9                        | 24                       | 87.5                | 51       | 2.8    | -        | -      | 90.3                    |
| 2-023 | 371                             | 373126              | 410       | 252240   | 39                    | 426       | 10070    | 55       | -         | -        | -        | 0.7                        | 39                       | 82.9                | 54       | 1.4    | -        | -      | 84.3                    |
| 2-029 | 371                             | 112763              | 440       | 225823   | 69                    | -         | -        | -        | -         | -        | -        | 2.0                        | 69                       | 100.0               | -        | -      | -        | -      | 100                     |
| 2-030 | 371                             | 402750              | 437       | 285082   | 66                    | -         | -        | -        | -         | -        | -        | 0.7                        | 66                       | 53.7                | -        | -      | -        | -      | 53.7                    |
| 2-031 | 371                             | 322941              | 389       | 3369     | 18                    | 416       | 1469     | 45       | -         | -        | -        | 0.0                        | 18                       | 9.4                 | 45       | 1.9    | -        | -      | 11.3                    |
| 2-032 | 371                             | 317074              | 389       | 5008     | 18                    | 416       | 3265     | 45       | -         | -        | -        | 0.0                        | 18                       | 100.0               | -        | -      | -        | -      | 100                     |
| 2-033 | 372                             | 175475              | 395       | 318914   | 23                    | 416       | 16256    | 44       | -         | -        | -        | 1.9                        | 24                       | 98.6                | 45       | 1.4    | -        | -      | 100                     |
| 2-035 | 372                             | 273144              | 389       | 253271   | 18                    | -         | -        | -        | -         | -        | -        | 0.9                        | 18                       | 100.0               | -        | -      | -        | -      | 100                     |
| 2-036 | 371                             | 385179              | 390       | 3433     | 19                    | 431       | 5606     | 60       | 471       | 33140    | 100      | 0.1                        | 18                       | 1.3                 | -        | -      | -        | -      | 1.3                     |
| 2-040 | 370                             | 228974              | 452       | 137466   | 82                    | -         | -        | -        | -         | -        | -        | 0.6                        | -                        | -                   | -        | -      | -        | -      | 0.0                     |
| 2-045 | 370                             | 115694              | 400       | 7559     | 30                    | 433       | 18887    | 63       | -         | -        | -        | 0.2                        | 30                       | 0.8                 | -        | -      | -        | -      | 0.8                     |
| 2-046 | 370                             | 144653              | 436       | 109706   | 66                    | 408       | 2678     | 38       | -         | -        | -        | 0.8                        | 66                       | 0.9                 | -        | -      | -        | -      | 0.9                     |
| 2-049 | 370                             | 112342              | 430       | 8550     | 60                    | -         | -        | -        | -         | -        | -        | 0.1                        | 60                       | 0.5                 | -        | -      | -        | -      | 0.5                     |
| 3-005 | 371                             | 233935              | 410       | 156584   | 39                    | -         | -        | -        | -         | -        | -        | 0.7                        | 39                       | 21.7                | -        | -      | -        | -      | 21.7                    |
| 3-009 | 371                             | 329610              | 416       | 10845    | 45                    | -         | -        | -        | -         | -        | -        | 0.0                        | -                        | -                   | -        | -      | -        | -      | 0.0                     |
| 3-020 | 370                             | 120019              | 484       | 9682     | 114                   | -         | -        | -        | -         | -        | -        | 0.1                        | -                        | -                   | -        | -      | -        | -      | 0.0                     |
| 3-026 | 370                             | 131710              | 421       | 90254    | 51                    | -         | -        | -        | -         | -        | -        | 0.7                        | 51                       | 13.8                | -        | -      | -        | -      | 13.8                    |
| 3-027 | 370                             | 115610              | 394       | 91660    | 24                    | -         | -        | -        | -         | -        | -        | 0.8                        | 24                       | 39.0                | 21       | 0.6    | 15       | 0.5    | 40.1                    |
| 3-028 | 370                             | 106326              | 438       | 153970   | 69                    | -         | -        | -        | -         | -        | -        | 1.4                        | 69                       | 1.6                 | -        | -      | -        | -      | 1.6                     |
| 3-035 | 371                             | 199588              | 392       | 90749    | 21                    | 425       | 16710    | 54       | -         | -        | -        | 0.5                        | 27                       | 0.6                 | 21       | 7.3    | -        | -      | 7.9                     |
| 3-037 | 370                             | 76730               | 421       | 145402   | 51                    | 440       | 10499    | 70       | -         | -        | -        | 2.0                        | 51                       | 4.0                 | -        | -      | -        | -      | 4.0                     |
| 3-039 | 371                             | 205570              | 398       | 3313     | 27                    | -         | -        | -        | -         | -        | -        | 0.0                        | -                        | -                   | -        | -      | -        | -      | 0.0                     |
| 3-041 | 371                             | 349304              | 416       | 278046   | 45                    | -         | -        | -        | -         | -        | -        | 0.8                        | 45                       | 23.2                | -        | -      | -        | -      | 23.2                    |



<sup>1</sup> Diagnostic results showed that 34 of the 100 AML cases were positive for *FLT3*-ITD. Included are 31 cases for which results were obtained in the accredited diagnostic laboratory of Leiden University Medical Center. PCR was performed on genomic DNA using NED-5'-GTAAAACGACGCCAGTCTGAAGCAATTTAGGTATGAAAGC-3' and VIC-5'-GGAAACAGCTATGACCATGTACCTTTCAGCATTTTGACG-3' as forward and reverse primers, respectively. PCR fragments were detected after capillary electrophoresis by measuring green (VIC) and yellow (NED) dyes.

<sup>2</sup> NGS was performed for all cases positive for *FLT3*-ITD by routine diagnostics on cDNA using 5'-TTGGTGTTTGTCTCCTCTTCA-3' and 5'-AAGCTGTTGCGTTCATCACTT-3' as forward and reverse primers, respectively (WT fragment = 246 bp). PCR fragments were analyzed by MiSeq.

<sup>3</sup> AUC; average area under the curve of measurements of green (VIC) and yellow (NED) dyes.

<sup>4</sup> ITD; length of ITD (bp) = size MUT – size WT fragments.

<sup>5</sup> Allelic ratio = AUC MUT / AUC WT fragments.

<sup>6</sup> Read percentages are determined relative to the most frequent MUT or WT sequence (100%).

<sup>7</sup> Total percentage of *FLT3*-ITD reads.

**Table SXV. Detection of *KMT2A*-PTD by ReSCU (Reciprocal Soft Clip Utilization)<sup>1</sup>.**

| AML   | ptd start <sup>2</sup> | ptd end <sup>3</sup> | ptd length <sup>4</sup> | ptd exons <sup>5</sup> | sc start count <sup>6</sup> | sc end count <sup>7</sup> | sc start pos <sup>8</sup> | sc start recipr pos <sup>9</sup> | sc end pos <sup>10</sup> | sc end recipr pos <sup>11</sup> | boundary type <sup>12</sup> | fuzziness <sup>13</sup> |
|-------|------------------------|----------------------|-------------------------|------------------------|-----------------------------|---------------------------|---------------------------|----------------------------------|--------------------------|---------------------------------|-----------------------------|-------------------------|
| 2-002 | 453.457                | 4106.4110            | 3654                    | exon 2-8               | 53                          | 48                        | 452                       | 4106                             | 4111                     | 457                             | fuzzy                       | 4                       |
| 2-008 | 453.457                | 4106.4110            | 3654                    | exon 2-8               | 7                           | 12                        | 452                       | 4106                             | 4111                     | 457                             | fuzzy                       | 4                       |
| 2-013 | 523.525                | 3654.3656            | 3132                    | exon 3-6               | 4                           | 12                        | 522                       | 3654                             | 3657                     | 525                             | fuzzy                       | 2                       |
| 2-027 | 453.455                | 522.524              | 70                      | exon 2                 | 7                           | 4                         | 452                       | 522                              | 525                      | 455                             | fuzzy                       | 2                       |
|       | 453.456                | 3176.3179            | 2724                    | exon 2-3               | 48                          | 41                        | 452                       | 3176                             | 3180                     | 456                             | fuzzy                       | 3                       |
| 2-036 | 453.457                | 4106.4110            | 3654                    | exon 2-8               | 40                          | 44                        | 452                       | 4106                             | 4111                     | 457                             | fuzzy                       | 4                       |
| 2-040 | 453.457                | 4106.4110            | 3654                    | exon 2-8               | 78                          | 48                        | 452                       | 4106                             | 4111                     | 457                             | fuzzy                       | 4                       |
| 2-054 | 451.455                | 4350.4354            | 3900                    | exon 2-10              | 3                           | 6                         | 450                       | 4350                             | 4355                     | 455                             | fuzzy                       | 4                       |
| 3-017 | 451.455                | 4350.4354            | 3900                    | exon 2-10              | 8                           | 6                         | 450                       | 4350                             | 4355                     | 455                             | fuzzy                       | 4                       |

<sup>1</sup> In ReSCU, RNAseq reads that partially align with the *KMT2A* primary gene transcript ENST00000534358 are selected as soft-clipped (SC) reads. The positions of the SC indicate the start and end of the PTD. SC reads aligning to exon 2-13 of the *KMT2A* transcript (456-4719 base pair region of the transcript corresponding to 433-4696 base pair region in the coding sequence) are extracted and analyzed for reciprocity. Reciprocal events are detected when SC regions of reads at the start of the PTD align with transcript regions at the end of the PTD, and vice versa. Samples are called positive for *KMT2A*-PTD upon detection of reciprocal events.

<sup>2</sup> Start of PTD as determined by the position of the SC +1.

<sup>3</sup> End of PTD as determined by the position of SC -1.

<sup>4</sup> Length of the PTD as determined by SC positions.

<sup>5</sup> Exons duplicated in the PTD as determined by SC positions.

<sup>6</sup> SC read counts at start of the PTD.

<sup>7</sup> SC read counts at end of the PTD.

<sup>8</sup> Position of the SC at start of the PTD.

<sup>9</sup> Position of the reciprocal event after alignment of the SC region of reads at start of the PTD.

<sup>10</sup> Position of the SC at end of the PTD.

<sup>11</sup> Position of the reciprocal event after alignment of the SC region of reads at end of the PTD.

<sup>12</sup> Indicated whether the position of the SC at start and/or end of the PTD is exact or fuzzy.

<sup>13</sup> Number of possible bases for the position of the SC at start and/or end of the PTD.

**Table SXVI. Primers used for validation of *KMT2A*-PTD by PCR<sup>1</sup>.**

| Primer       | Sequence (5'- 3')      | Position <sup>1</sup> |            | Size (bp) | PTD       |
|--------------|------------------------|-----------------------|------------|-----------|-----------|
|              |                        | start (cds)           | stop (cds) |           |           |
| KMT2A-Fex7-8 | ATCAGGTCCAGAGCAGAGCA   | 4008                  | 5028       | 448       | Exon 2-8  |
| KMT2A-Rex3   | AACATTCCACTTCCTCCATAGG | 784                   | 803        | 696       | Exon 2-10 |
| KMT2A-Fex6   | TGGATGCCTTCCAAAGCCTAC  | 3595                  | 3616       | 341       | Exon 3-6  |
| KMT2A-Rex3   | AACATTCCACTTCCTCCATAGG | 784                   | 803        |           |           |
| KMT2A-Fex3   | AACATTCCACTTCCTCCATAGG | 2999                  | 3020       | 193       | Exon 2-3  |
| KMT2A-Rex2   | TCTTCATCTGAGCCAAAACCT  | 447                   | 467        |           |           |
| KMT2A-Fex2   | AGTCAGAGTGCGAAGTCCC    | 468                   | 486        | 70        | Exon 2-2  |
| KMT2A-Rex2   | TCTTCATCTGAGCCAAAACCT  | 447                   | 467        |           |           |

<sup>1</sup> PCR was performed for 33 cycles using Phusion Flash High-Fidelity PCR Master Mix.

<sup>2</sup> position in coding sequence of ENST00000389506.

**Table SXVII. Detection of *MECOM/EVI1* overexpression.**

| Sample | RNAseq <sup>1</sup> | Q-RT-PCR <sup>2</sup> |
|--------|---------------------|-----------------------|
| 1-001  | <b>0.49</b>         | <b>0.22</b>           |
| 1-002  | 0                   | 0.00012               |
| 1-003  | 0                   | 5.83e-05              |
| 1-004  | 0                   | NA                    |
| 1-005  | <b>0.8</b>          | <b>2.94</b>           |
| 1-006  | 0                   | 4.56e-05              |
| 1-007  | 0                   | 0.0049                |
| 1-008  | <b>0.43</b>         | <b>0.28</b>           |
| 2-001  | 0                   | 1.54e-05              |
| 2-002  | 0                   | 0.00011               |
| 2-003  | 0                   | 9.83e-08              |
| 2-004  | 0                   | 0.00015               |
| 2-005  | 0.00042             | 0.0012                |
| 2-006  | 0.0015              | 0.00014               |
| 2-007  | 0.00067             | 4.21e-05              |
| 2-008  | 0                   | 1.86e-05              |
| 2-009  | 0                   | 3.77e-05              |
| 2-010  | 0                   | 7.89e-06              |
| 2-011  | 0                   | 0.00030               |
| 2-012  | 0                   | 1.4e-05               |
| 2-013  | 0.0021              | 0.00018               |
| 2-014  | 0                   | 0.0024                |
| 2-015  | 0                   | 4.17e-05              |
| 2-016  | 0                   | 1.16e-05              |
| 2-018  | 0                   | 8.83e-05              |
| 2-019  | 0                   | 4.32e-05              |
| 2-020  | 0.0011              | 0.00048               |
| 2-021  | 0.0011              | 6.96e-05              |
| 2-022  | 0                   | 7.56e-05              |
| 2-023  | 0                   | 1.05e-05              |
| 2-024  | 0.059               | 0.092                 |
| 2-025  | 0                   | 3.34e-05              |
| 2-027  | 0.0041              | 0.009                 |
| 2-028  | 0                   | 6.89e-05              |
| 2-029  | 0                   | 3.13e-05              |
| 2-030  | 0                   | 0.0025                |
| 2-031  | 0                   | 9.6e-05               |
| 2-032  | 0                   | 3.23e-05              |
| 2-033  | 0                   | 3.59e-05              |
| 2-034  | 0                   | 7.78e-05              |
| 2-035  | 0                   | 5.21e-05              |
| 2-036  | 0                   | NA                    |
| 2-037  | 0.00063             | NA                    |
| 2-038  | 0                   | 0.00022               |
| 2-039  | 0                   | 4.69e-05              |
| 2-040  | 0                   | 0.00029               |
| 2-041  | 0                   | 0.00024               |
| 2-043  | 0.0024              | 2.34e-05              |
| 2-044  | 0                   | 1.44e-05              |
| 2-045  | 0                   | 2.97e-05              |

| Sample | RNAseq <sup>1</sup> | Q-RT-PCR <sup>2</sup> |
|--------|---------------------|-----------------------|
| 2-046  | 0                   | 0.00016               |
| 2-047  | <b>1.4</b>          | <b>1.12</b>           |
| 2-048  | 0                   | 8.67e-05              |
| 2-049  | 0                   | 9.23e-05              |
| 2-050  | 0.012               | 0.014                 |
| 2-051  | 0                   | 7.79e-05              |
| 2-052  | 0                   | NA                    |
| 2-053  | 0                   | 4.78e-05              |
| 2-054  | 0                   | NA                    |
| 3-001  | 0                   | 0.00052               |
| 3-002  | 0                   | 0.00026               |
| 3-003  | 0                   | 5.15e-05              |
| 3-004  | 0.00062             | 0.0011                |
| 3-005  | 0                   | 0.00023               |
| 3-006  | 0                   | 6.94e-05              |
| 3-007  | 0                   | 0.00013               |
| 3-008  | <b>0.7</b>          | <b>0.62</b>           |
| 3-009  | 0                   | 0.00048               |
| 3-010  | 0                   | 0.00023               |
| 3-011  | 0                   | 7.13e-06              |
| 3-012  | 0                   | 0.00018               |
| 3-013  | 0                   | 4.12e-05              |
| 3-014  | 0                   | 5.82e-05              |
| 3-015  | 0.039               | NA                    |
| 3-016  | 0.028               | 0.022                 |
| 3-017  | 0                   | 0.0001                |
| 3-018  | 0.0011              | 0.0018                |
| 3-019  | 0                   | 0.00021               |
| 3-020  | 0                   | 0.00027               |
| 3-021  | 0                   | 0.0013                |
| 3-022  | <b>2.27</b>         | <b>1.2</b>            |
| 3-023  | 0.015               | 2.79e-05              |
| 3-024  | <b>0.13</b>         | NA                    |
| 3-025  | 0                   | 1.61e-05              |
| 3-026  | 0.00025             | NA                    |
| 3-027  | 0                   | 1.84e-05              |
| 3-028  | 0                   | 1.66e-05              |
| 3-029  | <b>1.1</b>          | <b>0.81</b>           |
| 3-030  | 0                   | 0.00018               |
| 3-031  | 0.0047              | NA                    |
| 3-032  | 0.0032              | 0.0042                |
| 3-033  | 0                   | 0.00019               |
| 3-034  | 0                   | 5.09e-05              |
| 3-035  | 0                   | 0.00054               |
| 3-037  | 0                   | 8.26e-05              |
| 3-038  | 0.0010              | 0.018                 |
| 3-039  | 0                   | 4.02e-05              |
| 3-040  | 0                   | 7.74e-05              |
| 3-041  | 0                   | 5.6e-05               |
| 3-042  | 0                   | 4.42e-05              |

<sup>1</sup> Expression measured as the sum of base coverage of the first exon of *EVI1* per kb transcript and one million mapped reads (log2 BPKM).

<sup>2</sup> Expression of the first exon of *EVI1* normalized for the *HMBS* housekeeping gene measured by quantitative RT-PCR as previously described (refs).

**Table SXVIII. Clonal evolution of longitudinal AML samples from four patients**

|                            | Primary                                                                                     | Relapse                                                      |
|----------------------------|---------------------------------------------------------------------------------------------|--------------------------------------------------------------|
| <b>Case</b>                | <b>2-015</b>                                                                                | <b>2-018</b>                                                 |
| <b>Karyotype</b>           | 46 XX                                                                                       | no metaphases                                                |
| <b>Fusion genes</b>        | none                                                                                        | none                                                         |
| <b>NPM1</b>                | ENST00000517671.3:c.860_863dup                                                              | ENST00000517671.3:c.860_863dup                               |
| <b>DNMT3A</b>              | ENST00000321117.7:c.1583_1603dup                                                            | wt                                                           |
| <b>FLT3-ITD</b>            | 1824-1874                                                                                   | 1824-1874                                                    |
| <b>TET2</b>                | ENST00000380013.6:c.4317dup                                                                 | wt                                                           |
| <b>WHO</b>                 | NPM1mut AML                                                                                 | NPM1mut AML                                                  |
| <b>Genomic</b>             | NPM1mut AML                                                                                 | NPM1mut AML                                                  |
| <b>2017 ELN Risk Group</b> | Intermediate                                                                                | Intermediate                                                 |
| <b>Case</b>                | <b>2-031</b>                                                                                | <b>2-032</b>                                                 |
| <b>Karyotype</b>           | 46 XY                                                                                       | 46 XY                                                        |
| <b>Fusion genes</b>        | NUP98--NSD1 chr11:3753316 chr5:177235821                                                    | NUP98--NSD1 chr11:3753316 chr5:177235821;<br>CLEC12A--CHMP1A |
| <b>FLT3-ITD</b>            | 1861-1874                                                                                   | 1861-1874                                                    |
| <b>WT1</b>                 | wt                                                                                          | ENST00000332351.5:c.1140dup;<br>ENST00000332351.5:c.1138C>G  |
| <b>WHO</b>                 | AML NOS                                                                                     | AML NOS                                                      |
| <b>Genomic</b>             | AML NOS with drivers                                                                        | AML NOS with drivers                                         |
| <b>2017 ELN Risk Group</b> | Intermediate                                                                                | Intermediate                                                 |
| <b>Case</b>                | <b>2-036</b>                                                                                | <b>2-040</b>                                                 |
| <b>Karyotype</b>           | 46 XX                                                                                       | 46 XX, t(1;16)(p22;q12)                                      |
| <b>Fusion genes</b>        | NCOR2-UBC; TPM4--KLF2                                                                       | none                                                         |
| <b>DNMT3A</b>              | ENST00000321117.7:c.2645G>C                                                                 | ENST00000321117.7:c.2645G>C                                  |
| <b>FLT3-ITD</b>            | 1812-1868; 1813-1909; 1875-1891                                                             | 1843-1919                                                    |
| <b>CEBPA</b>               | ENST00000498907.2:c.332C>G;<br>ENST00000498907.2:c.332_339del<br>ENST00000300305.5:c.167T>C | wt                                                           |
| <b>RUNX1</b>               |                                                                                             | ENST00000300305.5:c.167T>C                                   |
| <b>WT1</b>                 | wt                                                                                          | ENST00000332351.5:c.1106dup;<br>ENST00000332351.5:c.1105C>G  |
| <b>WHO</b>                 | AML NOS                                                                                     | AML NOS                                                      |
| <b>Genomic</b>             | Chromatin/Splicing                                                                          | Chromatin/Splicing                                           |
| <b>2017 ELN Risk Group</b> | Adverse                                                                                     | Adverse                                                      |
| <b>Case</b>                | <b>3-021</b>                                                                                | <b>3-038 (presumed therapy-related AML)</b>                  |
| <b>Karyotype</b>           | 46 XX                                                                                       | 48 XX, -7, +10, +19, +21                                     |
| <b>Fusion genes</b>        | TPM4--KLF2; PIM3--SCO2; OAZ1--KLF2; GUK1--<br>ARF1                                          | C15orf57--CBX3; NCOR2--UBC                                   |
| <b>NPM1</b>                | ENST00000517671.3:c.860_863dup                                                              | wt                                                           |
| <b>DNMT3A</b>              | ENST00000321117.7:c.2604del                                                                 | ENST00000321117.7:c.2340_2343del                             |
| <b>IDH2</b>                | ENST00000330062.5:c.419G>A                                                                  | ENST00000330062.5:c.419G>A                                   |
| <b>WHO</b>                 | NPM1mut AML                                                                                 | AML NOS                                                      |
| <b>Genomic</b>             | NPM1mut AML                                                                                 | AML with drivers                                             |
| <b>2017 ELN Risk Group</b> | Favorable                                                                                   | Intermediate                                                 |

# HAMLET

Acute Myeloid Leukemia mRNA-seq Analysis Pipeline

## Analysis Report

Sample '102581-03' - Run 'hamlet-c9d653a2'

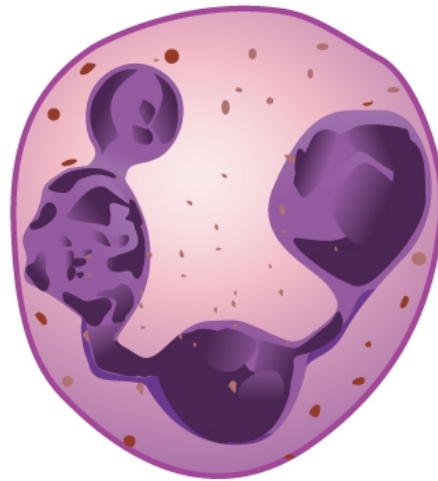

Version 0.1.0-26d901da\*

Generated on Wednesday, 09 May 2018 at 15:07

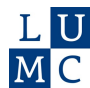

Department of Hematology  
Leiden University Medical Center

## Table of Contents

|                                 |    |
|---------------------------------|----|
| Table of Contents               | 1  |
| Basic Information               | 2  |
| Results Overview                | 3  |
| Sequencing Results              | 4  |
| Alignment Statistics            | 5  |
| Annotation Statistics           | 6  |
| Variant Calling Results         | 7  |
| TP53 variants                   | 7  |
| KIT variants                    | 8  |
| NPM1 variants                   | 9  |
| IDH2 variants                   | 11 |
| ASXL1 variants                  | 12 |
| DNMT3A variants                 | 13 |
| WT1 variants                    | 16 |
| NRAS variants                   | 17 |
| RUNX1 variants                  | 18 |
| IDH1 variants                   | 19 |
| TET2 variants                   | 20 |
| FLT3 variants                   | 21 |
| MECOM variants                  | 23 |
| CEBPA variants                  | 25 |
| Fusion Detection Results        | 26 |
| ITD/PTD Detection Results       | 27 |
| FLT3 ITD                        | 27 |
| KMT2A PTD                       | 27 |
| Overexpression Analysis Results | 28 |
| About                           | 29 |

## Basic Information

Table 1 | Pipeline and sample details

|                  |                 |
|------------------|-----------------|
| Sample name      | 102581-03       |
| Read group count | 3               |
| Run name         | hamlet-c9d653a2 |
| Pipeline version | 0.1.0-26d901da* |

Table 2 | Genes of interest defined for analysis

| No. | Gene symbol | Gene ID         | Transcript IDs of interest       |
|-----|-------------|-----------------|----------------------------------|
| 1.  | ASXL1       | ENSG00000171456 | ENST00000375687                  |
| 2.  | CEBPA       | ENSG00000245848 | ENST00000498907                  |
| 3.  | DNMT3A      | ENSG00000119772 | ENST00000321117                  |
| 4.  | FLT3        | ENSG00000122025 | ENST00000241453                  |
| 5.  | IDH1        | ENSG00000138413 | ENST00000345146                  |
| 6.  | IDH2        | ENSG00000182054 | ENST00000330062                  |
| 7.  | KIT         | ENSG00000157404 | ENST00000288135                  |
| 8.  | NPM1        | ENSG00000181163 | ENST00000517671                  |
| 9.  | NRAS        | ENSG00000213281 | ENST00000369535                  |
| 10. | RUNX1       | ENSG00000159216 | ENST00000300305                  |
| 11. | TET2        | ENSG00000168769 | ENST00000380013                  |
| 12. | TP53        | ENSG00000141510 | ENST00000269305                  |
| 13. | WT1         | ENSG00000184937 | ENST00000332351                  |
| 14. | MECOM       | ENSG00000085276 | ENST00000464456, ENST00000494292 |



## Results Overview

Table 3 | High-impact variants in genes of interest

| Gene   | HGVS description                   | Known database identifiers                                  |
|--------|------------------------------------|-------------------------------------------------------------|
| DNMT3A | ENST00000321117.7:c.2644C>T        | rs377577594, COSM1166704, COSM1583136, COSM53042, COSM87001 |
| NPM1   | ENST00000517671.3:c.860_861insCTGC | COSM20866, COSM20863, COSM1658759, COSM28937                |
| TET2   | ENST00000380013.6:c.3989C>A        | NA                                                          |
|        | ENST00000380013.6:c.5838_5839insA  | COSM1426222                                                 |

Table 4 | Top 5 detected fusion genes by supporting reads

| Fusion name | Fusion type     | Junction reads count | Spanning fragments count |
|-------------|-----------------|----------------------|--------------------------|
| TPM4--KLF2  | ONLY_REF_SPLICE | 6                    | 0                        |

Table 5 | Detected reciprocal soft clip events

| Gene  | Count |
|-------|-------|
| FLT3  | 2     |
| KMT2A | 0     |

Table 6 | Exon base count ratio over divisor gene

| Exon                      | Divisor gene | Ratio | Above threshold |
|---------------------------|--------------|-------|-----------------|
| MECOM:169146722-169147734 | HMBS         | 0     | no              |

## Sequencing Results

Table 7 | Combined reads statistics

| Metric            | R1         | R2         | R1 + R2     |
|-------------------|------------|------------|-------------|
| # Raw reads       | 53,864,742 | 53,864,742 | 107,729,484 |
| # Processed reads | 52,731,725 | 52,731,725 | 105,463,450 |
| % Retained reads  | n/a        | n/a        | 97.90%      |

Table 8 | Per read group statistics

| Read Group | Raw        |     |            |     | Processed  |     |            |     |
|------------|------------|-----|------------|-----|------------|-----|------------|-----|
|            | R1         |     | R2         |     | R1         |     | R2         |     |
|            | #Reads     | %GC | #Reads     | %GC | #Reads     | %GC | #Reads     | %GC |
| rg_1       | 14,940,329 | 48  | 14,940,329 | 48  | 14,641,869 | 48  | 14,641,869 | 48  |
| rg_2       | 31,597,414 | 48  | 31,597,414 | 48  | 30,892,774 | 48  | 30,892,774 | 48  |
| rg_3       | 7,326,999  | 48  | 7,326,999  | 48  | 7,197,082  | 48  | 7,197,082  | 48  |

# Alignment Statistics

Table 9 | Alignment count statistics

| Metric                 | Count          | % of total | % of aligned |
|------------------------|----------------|------------|--------------|
| Total reads            | 105,485,637    | 100%       | 105.10%      |
| Reads aligned          | 100,369,359    | 95.15%     | 100%         |
| Reads aligned properly | 99,769,438     | 94.58%     | 99.40%       |
| Total bases            | 13,065,206,475 | 100%       | 107.37%      |
| Bases aligned          | 12,168,410,518 | 93.14%     | 100%         |

Table 10 | Insert size statistics

|                           |             |
|---------------------------|-------------|
| Median                    | 169         |
| Median absolute deviation | 36          |
| Maximum                   | 249,095,288 |
| Minimum                   | 1           |

Table 11 | Other alignment statistics

|                |          |
|----------------|----------|
| Strand balance | 0.4999   |
| Mismatch rate  | 1.97e-03 |
| Indel rate     | 1.87e-04 |

## Annotation Statistics

Table 12 | Base-level annotation statistics

| Metric                        | Count          | % of aligned |
|-------------------------------|----------------|--------------|
| Total aligned                 | 12,168,410,518 | 100%         |
| Aligned to mRNA (CDS + UTR)   | 9,209,245,449  | 75.68%       |
| Aligned to CDS                | 5,416,844,873  | 44.52%       |
| Aligned to UTR                | 3,792,400,576  | 31.17%       |
| Aligned to introns            | 2,451,281,466  | 20.14%       |
| Aligned to intergenic regions | 505,889,353    | 4.16%        |
| Aligned to rRNA               | 2,080,252      | 0.02%        |

# Variant Calling Results

Table 13 | Variant calling results by type

| Type      | Count   | % of total |
|-----------|---------|------------|
| Total     | 219,462 | 100%       |
| SNV       | 196,329 | 89.46%     |
| Insertion | 15,023  | 6.85%      |
| Deletion  | 8,110   | 3.70%      |

## TP53 variants

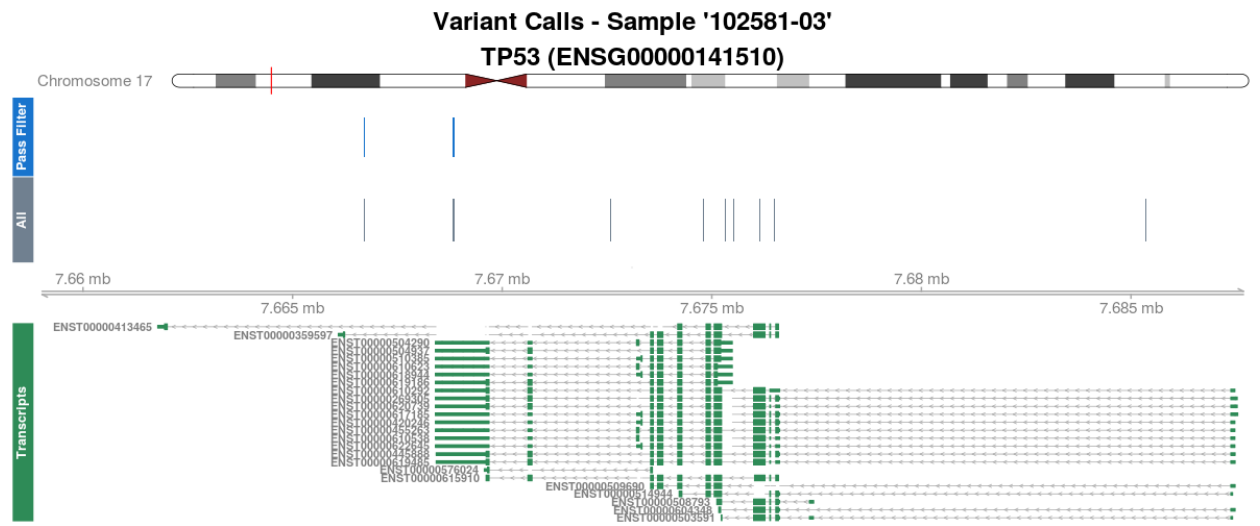

Figure 1 | TP53 variant calling results

Table 14 | Exon statistics of transcript ENST00000269305 (TP53)

| Index | Location (chr17) |           | Coverage |       |       | Fraction covered at least |     |     |
|-------|------------------|-----------|----------|-------|-------|---------------------------|-----|-----|
|       | Start            | End       | Median   | Avg   | Stdev | 10x                       | 20x | 30x |
| 1     | 7,668,401        | 7,669,690 | 525      | 478.1 | 151.2 | 1.0                       | 1.0 | 1.0 |
| 2     | 7,670,608        | 7,670,715 | 386      | 381.4 | 16.6  | 1.0                       | 1.0 | 1.0 |
| 3     | 7,673,534        | 7,673,608 | 446      | 444.8 | 14.3  | 1.0                       | 1.0 | 1.0 |
| 4     | 7,673,700        | 7,673,837 | 446      | 442.2 | 22.5  | 1.0                       | 1.0 | 1.0 |
| 5     | 7,674,180        | 7,674,290 | 419      | 412.4 | 19.8  | 1.0                       | 1.0 | 1.0 |
| 6     | 7,674,858        | 7,674,971 | 369      | 371.5 | 25.5  | 1.0                       | 1.0 | 1.0 |
| 7     | 7,675,052        | 7,675,236 | 368      | 367.4 | 23.1  | 1.0                       | 1.0 | 1.0 |
| 8     | 7,675,993        | 7,676,272 | 413      | 406.1 | 39.7  | 1.0                       | 1.0 | 1.0 |
| 9     | 7,676,381        | 7,676,403 | 422      | 417.0 | 14.2  | 1.0                       | 1.0 | 1.0 |
| 10    | 7,676,520        | 7,676,622 | 369      | 370.0 | 15.1  | 1.0                       | 1.0 | 1.0 |
| 11    | 7,687,376        | 7,687,538 | 156      | 166.0 | 119.7 | 1.0                       | 1.0 | 1.0 |

## KIT variants

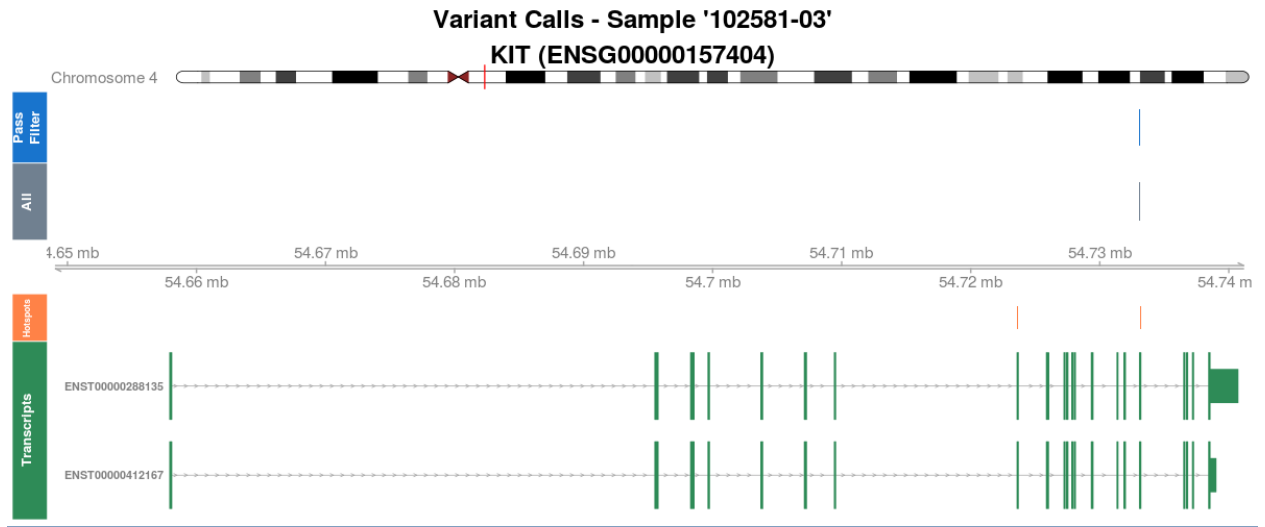

Figure 2 | KIT variant calling results

Table 15 | Exon statistics of transcript ENST00000288135 (KIT)

| Index | Location (chr4) |            | Coverage |      |       | Fraction covered at least |     |     |
|-------|-----------------|------------|----------|------|-------|---------------------------|-----|-----|
|       | Start           | End        | Median   | Avg  | Stdev | 10x                       | 20x | 30x |
| 1     | 54,657,917      | 54,658,081 | 15       | 13.7 | 10.0  | 0.6                       | 0.4 | 0.0 |
| 2     | 54,695,511      | 54,695,781 | 20       | 19.8 | 6.2   | 1.0                       | 0.5 | 0.1 |
| 3     | 54,698,283      | 54,698,565 | 19       | 19.2 | 3.4   | 1.0                       | 0.5 | 0.0 |
| 4     | 54,699,629      | 54,699,766 | 10       | 11.8 | 6.0   | 0.5                       | 0.1 | 0.0 |
| 5     | 54,703,723      | 54,703,892 | 12       | 11.2 | 2.2   | 0.7                       | 0.0 | 0.0 |
| 6     | 54,707,097      | 54,707,287 | 15       | 15.1 | 1.3   | 1.0                       | 0.0 | 0.0 |
| 7     | 54,709,423      | 54,709,539 | 13       | 12.1 | 1.6   | 1.0                       | 0.0 | 0.0 |
| 8     | 54,723,583      | 54,723,698 | 22       | 21.2 | 3.3   | 1.0                       | 0.8 | 0.0 |
| 9     | 54,725,856      | 54,726,050 | 25       | 25.0 | 6.2   | 1.0                       | 0.8 | 0.2 |
| 10    | 54,727,217      | 54,727,324 | 26       | 25.0 | 3.3   | 1.0                       | 0.9 | 0.0 |
| 11    | 54,727,415      | 54,727,542 | 14       | 13.9 | 2.1   | 1.0                       | 0.0 | 0.0 |
| 12    | 54,727,822      | 54,727,927 | 13       | 13.5 | 2.0   | 1.0                       | 0.0 | 0.0 |
| 13    | 54,728,010      | 54,728,121 | 18       | 18.6 | 2.8   | 1.0                       | 0.5 | 0.0 |
| 14    | 54,729,334      | 54,729,485 | 21       | 21.6 | 5.2   | 1.0                       | 0.6 | 0.0 |
| 15    | 54,731,327      | 54,731,419 | 32       | 32.0 | 1.4   | 1.0                       | 1.0 | 1.0 |
| 16    | 54,731,870      | 54,731,998 | 22       | 22.8 | 3.0   | 1.0                       | 0.9 | 0.0 |
| 17    | 54,733,069      | 54,733,192 | 30       | 28.1 | 3.8   | 1.0                       | 1.0 | 0.5 |
| 18    | 54,736,497      | 54,736,609 | 23       | 24.2 | 5.5   | 1.0                       | 0.7 | 0.3 |
| 19    | 54,736,720      | 54,736,820 | 38       | 37.2 | 3.0   | 1.0                       | 1.0 | 1.0 |
| 20    | 54,737,174      | 54,737,280 | 42       | 42.8 | 4.1   | 1.0                       | 1.0 | 1.0 |
| 21    | 54,738,428      | 54,740,715 | 43       | 45.5 | 16.7  | 1.0                       | 0.9 | 0.9 |

# NPM1 variants

## Variant Calls - Sample '102581-03' NPM1 (ENSG00000181163)

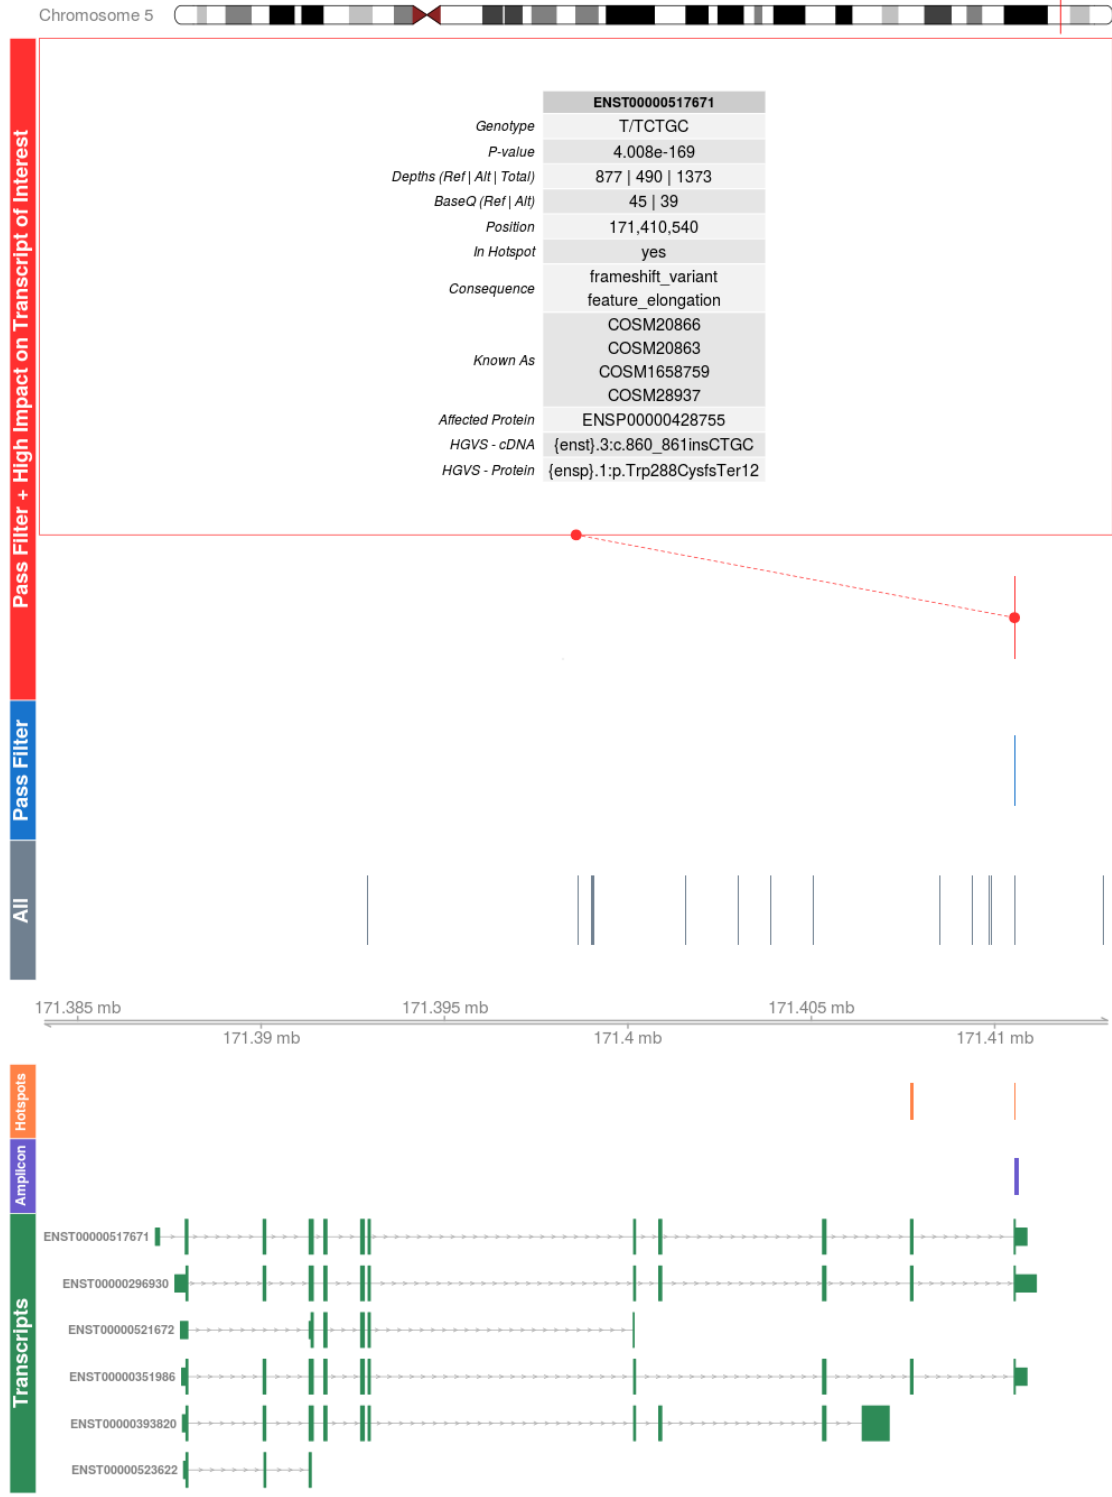

Figure 3 | NPM1 variant calling results



Table 16 | Exon statistics of transcript ENST00000517671 (NPM1)

| Index | Location (chr5) |             | Coverage |         |         | Fraction covered at least |     |     |
|-------|-----------------|-------------|----------|---------|---------|---------------------------|-----|-----|
|       | Start           | End         | Median   | Avg     | Stdev   | 10x                       | 20x | 30x |
| 1     | 171,387,115     | 171,387,234 | 5        | 5.0     | 0.0     | 0.0                       | 0.0 | 0.0 |
| 2     | 171,387,932     | 171,388,006 | 4,134    | 4,020.5 | 462.6   | 1.0                       | 1.0 | 1.0 |
| 3     | 171,390,050     | 171,390,130 | 3,779    | 3,704.7 | 255.2   | 1.0                       | 1.0 | 1.0 |
| 4     | 171,391,304     | 171,391,424 | 3,688    | 3,679.2 | 449.1   | 1.0                       | 1.0 | 1.0 |
| 5     | 171,391,705     | 171,391,799 | 2,405    | 2,339.0 | 395.2   | 1.0                       | 1.0 | 1.0 |
| 6     | 171,392,709     | 171,392,816 | 1,138    | 1,173.1 | 354.7   | 1.0                       | 1.0 | 1.0 |
| 7     | 171,392,913     | 171,392,978 | 760      | 773.3   | 48.4    | 1.0                       | 1.0 | 1.0 |
| 8     | 171,400,152     | 171,400,210 | 1,344    | 1,275.5 | 249.2   | 1.0                       | 1.0 | 1.0 |
| 9     | 171,400,838     | 171,400,925 | 2,586    | 2,919.4 | 891.8   | 1.0                       | 1.0 | 1.0 |
| 10    | 171,405,301     | 171,405,403 | 3,961    | 3,782.1 | 490.0   | 1.0                       | 1.0 | 1.0 |
| 11    | 171,407,699     | 171,407,774 | 1,589    | 1,549.1 | 119.7   | 1.0                       | 1.0 | 1.0 |
| 12    | 171,410,526     | 171,410,883 | 3,471    | 3,022.0 | 1,259.9 | 1.0                       | 1.0 | 1.0 |

## IDH2 variants

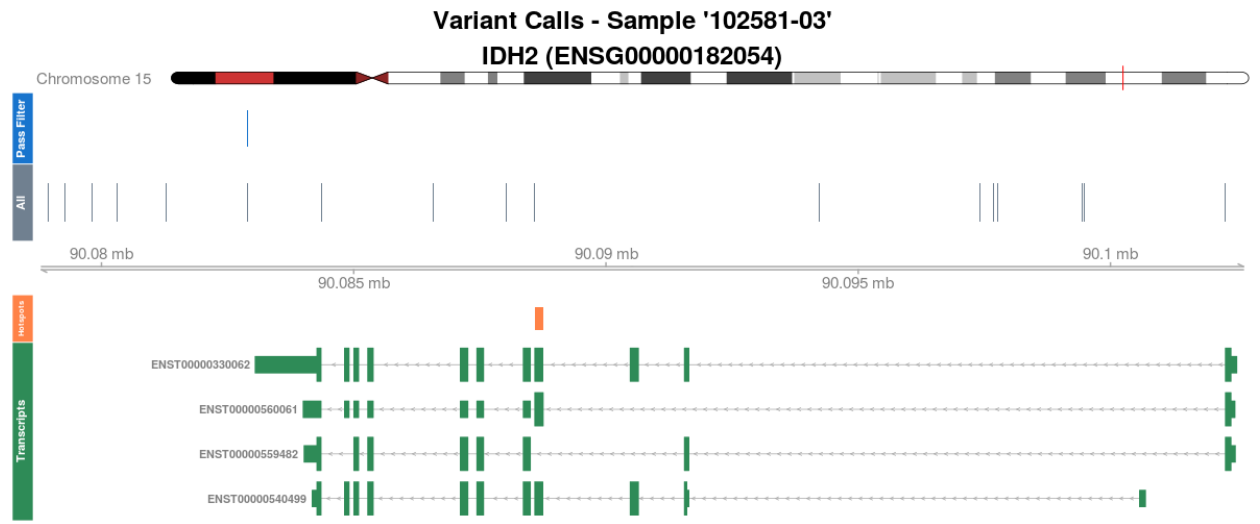

Figure 4 | IDH2 variant calling results

Table 17 | Exon statistics of transcript ENST00000330062 (IDH2)

| Index | Location (chr15) |            | Coverage |         |       | Fraction covered at least |     |     |
|-------|------------------|------------|----------|---------|-------|---------------------------|-----|-----|
|       | Start            | End        | Median   | Avg     | Stdev | 10x                       | 20x | 30x |
| 1     | 90,083,044       | 90,084,353 | 183      | 284.5   | 309.8 | 1.0                       | 0.9 | 0.9 |
| 2     | 90,084,815       | 90,084,908 | 1,573    | 1,571.4 | 54.3  | 1.0                       | 1.0 | 1.0 |
| 3     | 90,085,000       | 90,085,098 | 1,298    | 1,291.5 | 67.0  | 1.0                       | 1.0 | 1.0 |
| 4     | 90,085,274       | 90,085,387 | 1,094    | 1,091.7 | 41.4  | 1.0                       | 1.0 | 1.0 |
| 5     | 90,087,111       | 90,087,263 | 1,119    | 1,110.4 | 48.8  | 1.0                       | 1.0 | 1.0 |
| 6     | 90,087,438       | 90,087,575 | 1,057    | 1,060.2 | 49.9  | 1.0                       | 1.0 | 1.0 |
| 7     | 90,088,358       | 90,088,502 | 1,079    | 1,085.6 | 103.0 | 1.0                       | 1.0 | 1.0 |
| 8     | 90,088,586       | 90,088,747 | 1,063    | 1,059.4 | 106.7 | 1.0                       | 1.0 | 1.0 |
| 9     | 90,090,478       | 90,090,644 | 850      | 860.4   | 80.9  | 1.0                       | 1.0 | 1.0 |
| 10    | 90,091,552       | 90,091,644 | 671      | 646.8   | 59.1  | 1.0                       | 1.0 | 1.0 |
| 11    | 90,102,275       | 90,102,504 | 421      | 355.9   | 206.3 | 1.0                       | 0.9 | 0.9 |

## ASXL1 variants

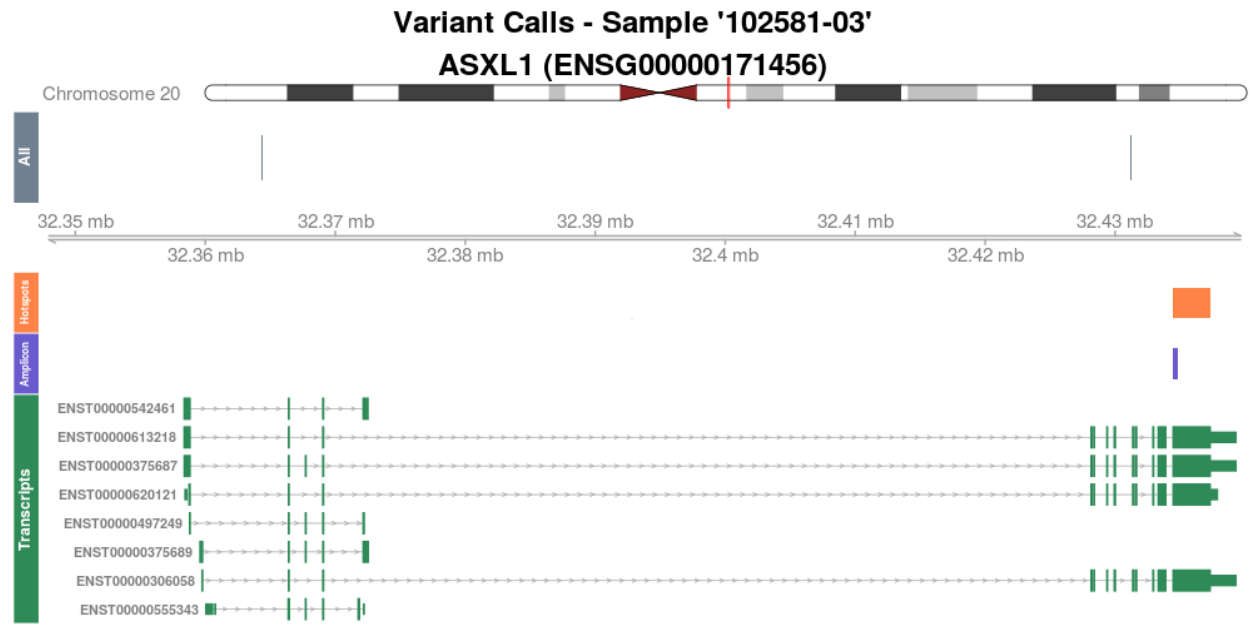

Figure 5 | ASXL1 variant calling results

Table 18 | Exon statistics of transcript ENST00000375687 (ASXL1)

| Index | Location (chr20) |            | Coverage |       |       | Fraction covered at least |     |     |
|-------|------------------|------------|----------|-------|-------|---------------------------|-----|-----|
|       | Start            | End        | Median   | Avg   | Stdev | 10x                       | 20x | 30x |
| 1     | 32,358,351       | 32,358,832 | 23       | 30.4  | 17.1  | 1.0                       | 0.7 | 0.4 |
| 2     | 32,366,383       | 32,366,466 | 161      | 160.2 | 13.6  | 1.0                       | 1.0 | 1.0 |
| 3     | 32,367,726       | 32,367,729 | 99       | 99.0  | 0.0   | 1.0                       | 1.0 | 1.0 |
| 4     | 32,369,014       | 32,369,123 | 176      | 176.2 | 9.6   | 1.0                       | 1.0 | 1.0 |
| 5     | 32,428,127       | 32,428,248 | 186      | 184.8 | 14.1  | 1.0                       | 1.0 | 1.0 |
| 6     | 32,428,324       | 32,428,422 | 182      | 184.1 | 8.9   | 1.0                       | 1.0 | 1.0 |
| 7     | 32,429,337       | 32,429,431 | 160      | 158.8 | 6.0   | 1.0                       | 1.0 | 1.0 |
| 8     | 32,429,900       | 32,430,053 | 160      | 160.0 | 9.0   | 1.0                       | 1.0 | 1.0 |
| 9     | 32,431,320       | 32,431,484 | 209      | 209.5 | 8.0   | 1.0                       | 1.0 | 1.0 |
| 10    | 32,431,582       | 32,431,679 | 242      | 240.9 | 13.2  | 1.0                       | 1.0 | 1.0 |
| 11    | 32,432,879       | 32,432,985 | 238      | 240.4 | 10.0  | 1.0                       | 1.0 | 1.0 |
| 12    | 32,433,283       | 32,433,917 | 253      | 238.8 | 45.5  | 1.0                       | 1.0 | 1.0 |
| 13    | 32,434,431       | 32,439,319 | 244      | 238.6 | 93.7  | 1.0                       | 1.0 | 1.0 |

# DNMT3A variants

## Variant Calls - Sample '102581-03' DNMT3A (ENSG00000119772)

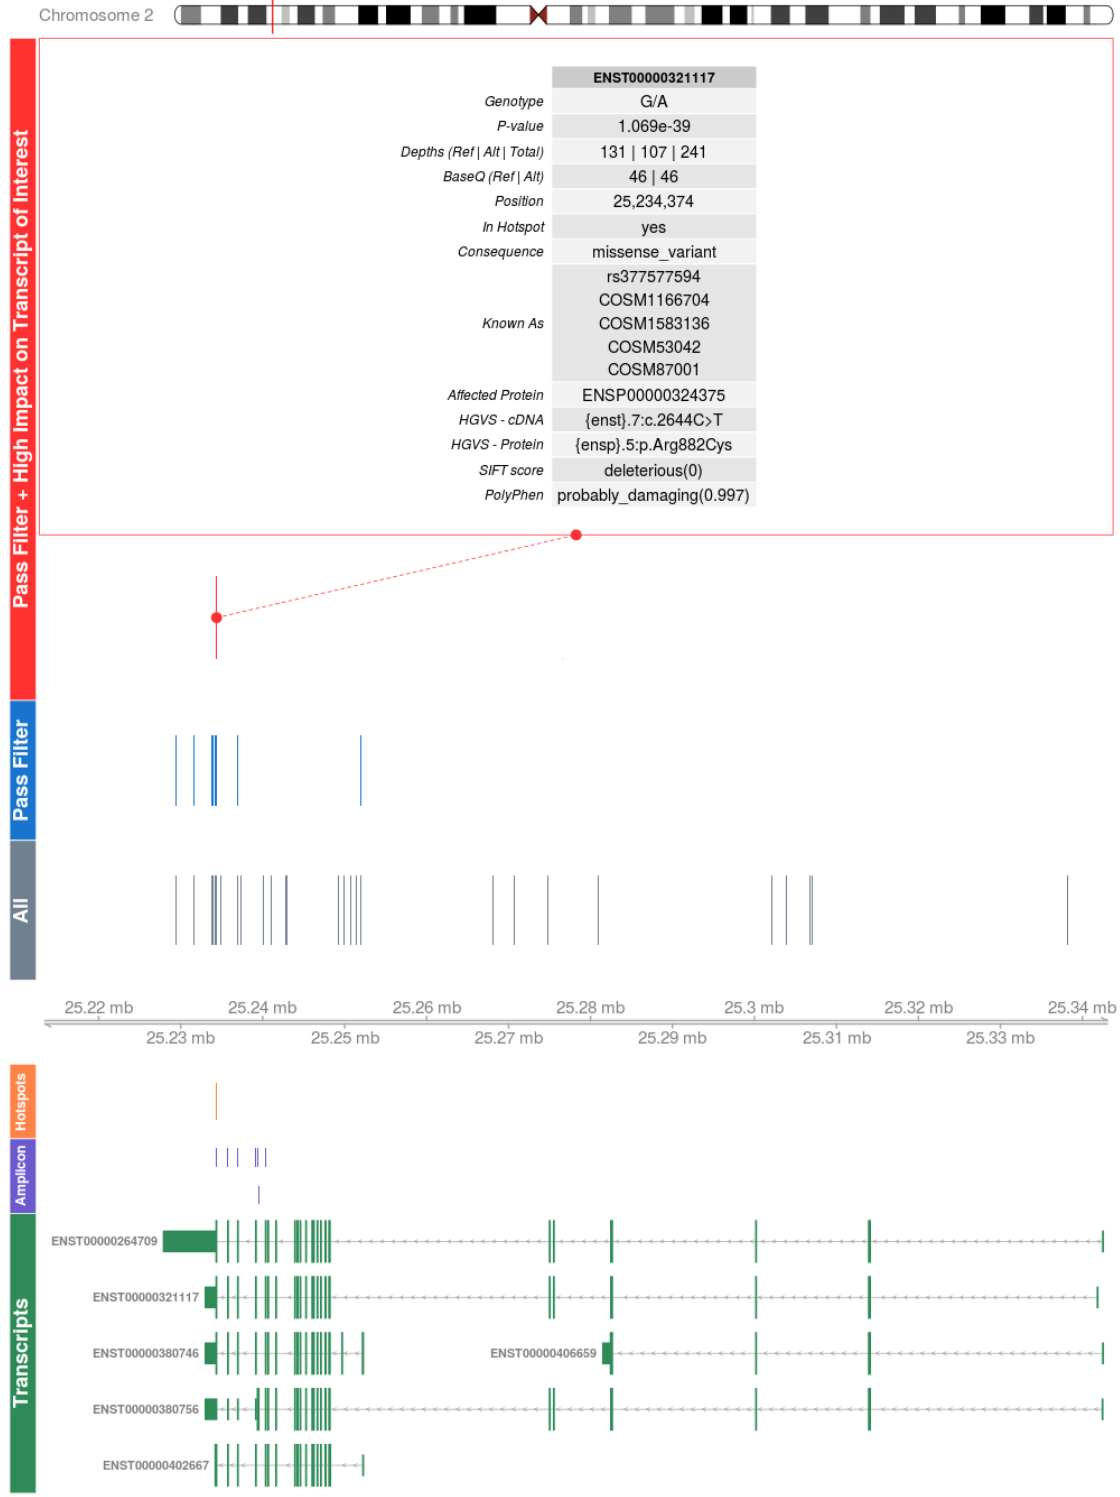

Figure 6 | DNMT3A variant calling results

Table 19 | Exon statistics of transcript ENST00000321117 (DNMT3A)

| Index | Location (chr2) |            | Coverage |       |       | Fraction covered at least |     |     |
|-------|-----------------|------------|----------|-------|-------|---------------------------|-----|-----|
|       | Start           | End        | Median   | Avg   | Stdev | 10x                       | 20x | 30x |
| 1     | 25,232,975      | 25,234,420 | 325      | 309.1 | 124.7 | 1.0                       | 1.0 | 1.0 |
| 2     | 25,235,706      | 25,235,825 | 374      | 360.0 | 35.8  | 1.0                       | 1.0 | 1.0 |
| 3     | 25,236,935      | 25,237,005 | 407      | 409.0 | 17.9  | 1.0                       | 1.0 | 1.0 |
| 4     | 25,239,129      | 25,239,215 | 323      | 319.3 | 25.4  | 1.0                       | 1.0 | 1.0 |
| 5     | 25,240,301      | 25,240,450 | 272      | 269.3 | 13.1  | 1.0                       | 1.0 | 1.0 |
| 6     | 25,240,639      | 25,240,730 | 296      | 294.4 | 8.5   | 1.0                       | 1.0 | 1.0 |
| 7     | 25,241,561      | 25,241,707 | 340      | 339.4 | 16.4  | 1.0                       | 1.0 | 1.0 |
| 8     | 25,243,897      | 25,243,982 | 313      | 307.9 | 20.4  | 1.0                       | 1.0 | 1.0 |
| 9     | 25,244,154      | 25,244,338 | 234      | 236.5 | 13.2  | 1.0                       | 1.0 | 1.0 |
| 10    | 25,244,539      | 25,244,652 | 282      | 287.8 | 24.7  | 1.0                       | 1.0 | 1.0 |
| 11    | 25,245,252      | 25,245,332 | 309      | 307.1 | 11.1  | 1.0                       | 1.0 | 1.0 |
| 12    | 25,246,019      | 25,246,064 | 244      | 243.0 | 7.6   | 1.0                       | 1.0 | 1.0 |
| 13    | 25,246,159      | 25,246,309 | 264      | 265.5 | 28.9  | 1.0                       | 1.0 | 1.0 |
| 14    | 25,246,619      | 25,246,776 | 271      | 261.4 | 22.1  | 1.0                       | 1.0 | 1.0 |
| 15    | 25,247,050      | 25,247,158 | 314      | 311.0 | 17.9  | 1.0                       | 1.0 | 1.0 |
| 16    | 25,247,590      | 25,247,749 | 166      | 192.7 | 53.7  | 1.0                       | 1.0 | 1.0 |
| 17    | 25,248,036      | 25,248,252 | 278      | 269.8 | 53.4  | 1.0                       | 1.0 | 1.0 |
| 18    | 25,274,940      | 25,275,087 | 50       | 49.4  | 4.4   | 1.0                       | 1.0 | 1.0 |
| 19    | 25,275,499      | 25,275,543 | 38       | 37.7  | 2.2   | 1.0                       | 1.0 | 1.0 |
| 20    | 25,282,440      | 25,282,711 | 74       | 85.2  | 30.0  | 1.0                       | 1.0 | 1.0 |
| 21    | 25,300,138      | 25,300,243 | 120      | 119.6 | 5.7   | 1.0                       | 1.0 | 1.0 |
| 22    | 25,313,912      | 25,314,161 | 88       | 98.2  | 19.8  | 1.0                       | 1.0 | 1.0 |
| 23    | 25,341,825      | 25,341,885 | 46       | 47.1  | 7.7   | 1.0                       | 1.0 | 1.0 |

## WT1 variants

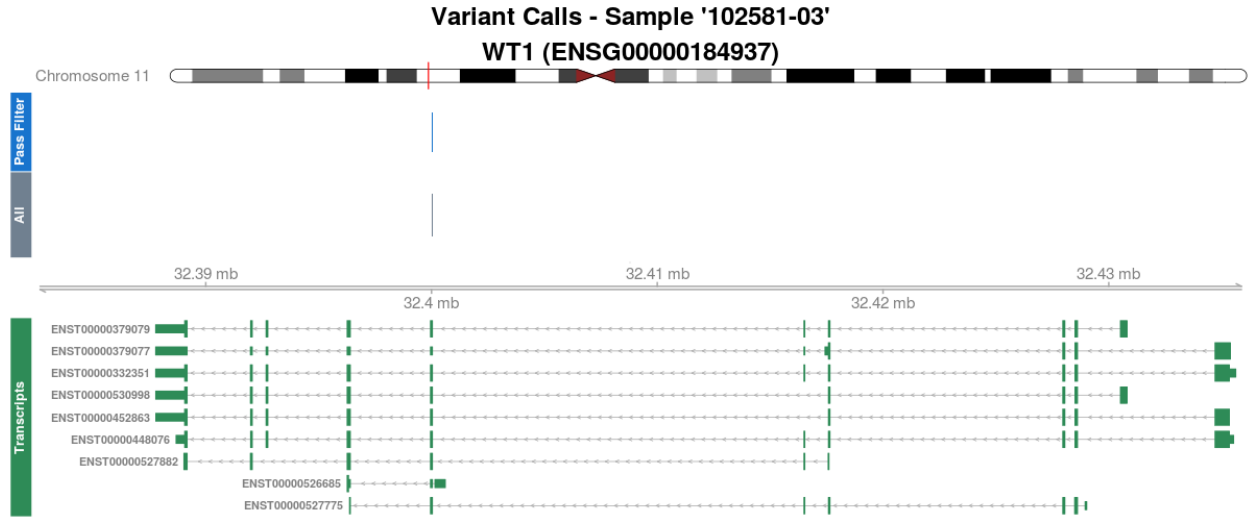

Figure 7 | WT1 variant calling results

Table 20 | Exon statistics of transcript ENST00000332351 (WT1)

| Index | Location (chr11) |            | Coverage |       |       | Fraction covered at least |     |     |
|-------|------------------|------------|----------|-------|-------|---------------------------|-----|-----|
|       | Start            | End        | Median   | Avg   | Stdev | 10x                       | 20x | 30x |
| 1     | 32,387,774       | 32,389,179 | 122      | 117.7 | 35.0  | 1.0                       | 1.0 | 1.0 |
| 2     | 32,391,971       | 32,392,064 | 108      | 112.8 | 12.2  | 1.0                       | 1.0 | 1.0 |
| 3     | 32,392,665       | 32,392,755 | 126      | 124.3 | 10.8  | 1.0                       | 1.0 | 1.0 |
| 4     | 32,396,256       | 32,396,407 | 104      | 105.0 | 10.5  | 1.0                       | 1.0 | 1.0 |
| 5     | 32,399,947       | 32,400,044 | 89       | 88.7  | 4.3   | 1.0                       | 1.0 | 1.0 |
| 6     | 32,416,489       | 32,416,540 | 74       | 73.1  | 3.2   | 1.0                       | 1.0 | 1.0 |
| 7     | 32,417,576       | 32,417,654 | 105      | 102.4 | 8.2   | 1.0                       | 1.0 | 1.0 |
| 8     | 32,427,955       | 32,428,058 | 80       | 78.7  | 12.6  | 1.0                       | 1.0 | 1.0 |
| 9     | 32,428,496       | 32,428,619 | 64       | 62.9  | 8.3   | 1.0                       | 1.0 | 1.0 |
| 10    | 32,434,699       | 32,435,630 | 52       | 52.7  | 27.1  | 0.9                       | 0.9 | 0.8 |

## NRAS variants

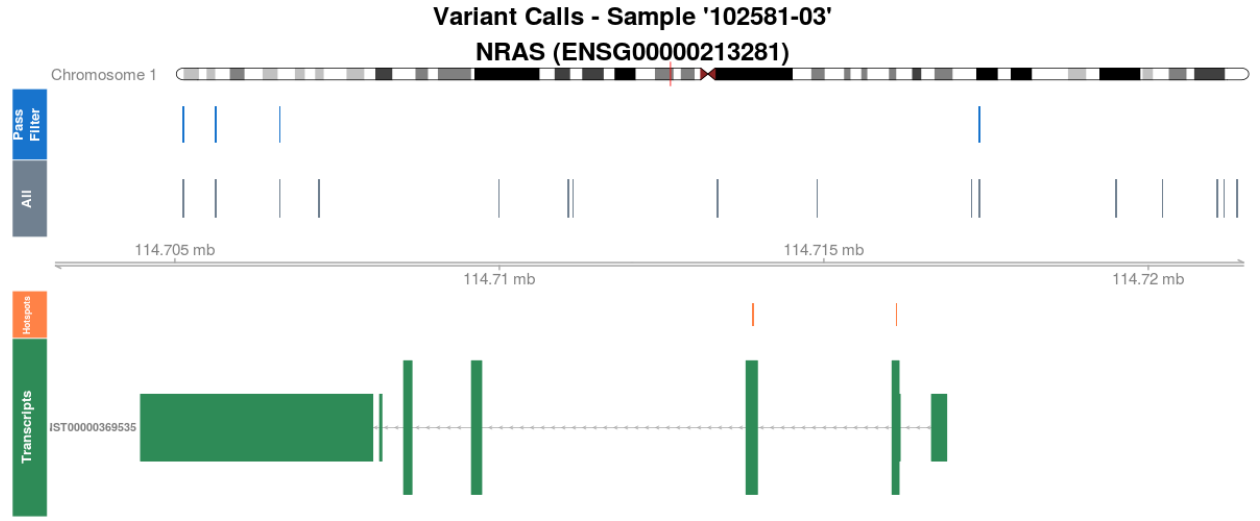

Figure 8 | NRAS variant calling results

Table 21 | Exon statistics of transcript ENST00000369535 (NRAS)

| Index | Location (chr1) |             | Coverage |       |       | Fraction covered at least |     |     |
|-------|-----------------|-------------|----------|-------|-------|---------------------------|-----|-----|
|       | Start           | End         | Median   | Avg   | Stdev | 10x                       | 20x | 30x |
| 1     | 114,704,468     | 114,708,050 | 206      | 211.3 | 58.5  | 1.0                       | 1.0 | 1.0 |
| 2     | 114,708,153     | 114,708,192 | 180      | 177.7 | 9.2   | 1.0                       | 1.0 | 1.0 |
| 3     | 114,708,530     | 114,708,654 | 247      | 222.0 | 42.1  | 1.0                       | 1.0 | 1.0 |
| 4     | 114,709,568     | 114,709,728 | 233      | 234.8 | 23.1  | 1.0                       | 1.0 | 1.0 |
| 5     | 114,713,799     | 114,713,978 | 196      | 195.2 | 10.2  | 1.0                       | 1.0 | 1.0 |
| 6     | 114,716,049     | 114,716,177 | 170      | 169.0 | 6.6   | 1.0                       | 1.0 | 1.0 |
| 7     | 114,716,657     | 114,716,894 | 5        | 43.4  | 54.5  | 0.4                       | 0.4 | 0.4 |

## RUNX1 variants

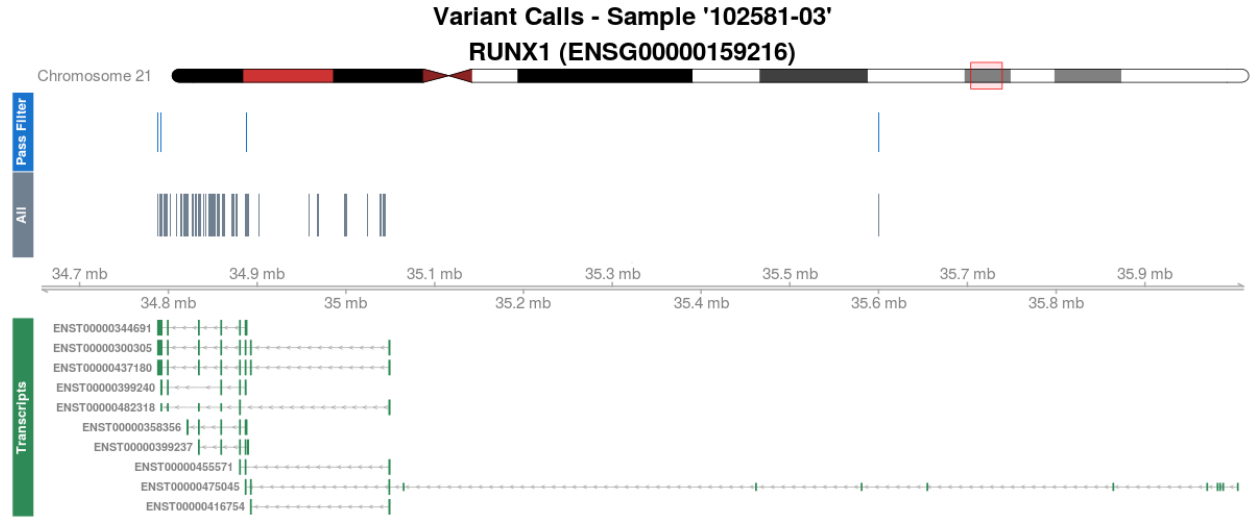

Figure 9 | RUNX1 variant calling results

Table 22 | Exon statistics of transcript ENST00000300305 (RUNX1)

| Index | Location (chr21) |            | Coverage |         |       | Fraction covered at least |     |     |
|-------|------------------|------------|----------|---------|-------|---------------------------|-----|-----|
|       | Start            | End        | Median   | Avg     | Stdev | 10x                       | 20x | 30x |
| 1     | 34,787,800       | 34,792,610 | 945      | 994.2   | 471.9 | 1.0                       | 1.0 | 1.0 |
| 2     | 34,799,300       | 34,799,462 | 1,114    | 1,105.1 | 85.1  | 1.0                       | 1.0 | 1.0 |
| 3     | 34,834,409       | 34,834,601 | 1,197    | 1,188.5 | 60.8  | 1.0                       | 1.0 | 1.0 |
| 4     | 34,859,473       | 34,859,578 | 1,206    | 1,196.2 | 54.3  | 1.0                       | 1.0 | 1.0 |
| 5     | 34,880,556       | 34,880,713 | 1,012    | 1,015.7 | 68.5  | 1.0                       | 1.0 | 1.0 |
| 6     | 34,886,842       | 34,887,096 | 609      | 617.1   | 75.4  | 1.0                       | 1.0 | 1.0 |
| 7     | 34,892,924       | 34,892,963 | 154      | 154.4   | 4.8   | 1.0                       | 1.0 | 1.0 |
| 8     | 35,048,841       | 35,049,344 | 169      | 153.9   | 73.8  | 0.9                       | 0.9 | 0.9 |



## IDH1 variants

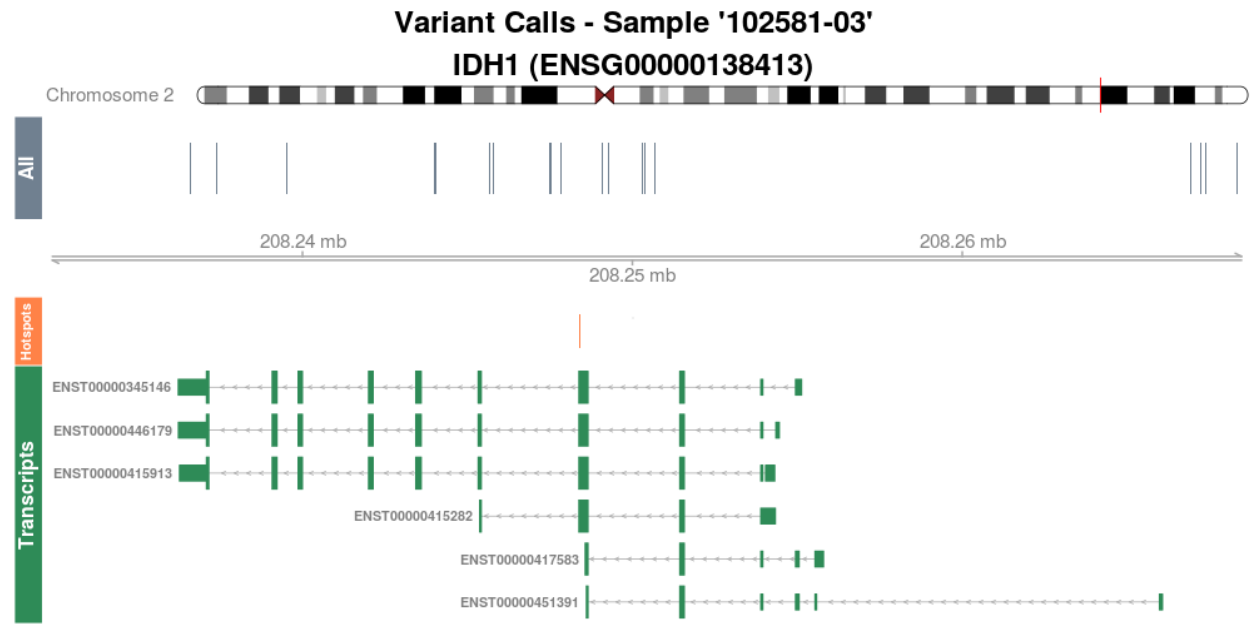

Figure 10 | IDH1 variant calling results

Table 23 | Exon statistics of transcript ENST00000345146 (IDH1)

| Index | Location (chr2) |             | Coverage |       |       | Fraction covered at least |     |     |
|-------|-----------------|-------------|----------|-------|-------|---------------------------|-----|-----|
|       | Start           | End         | Median   | Avg   | Stdev | 10x                       | 20x | 30x |
| 1     | 208,236,226     | 208,237,169 | 392      | 380.0 | 144.4 | 1.0                       | 1.0 | 1.0 |
| 2     | 208,239,070     | 208,239,233 | 422      | 420.9 | 35.7  | 1.0                       | 1.0 | 1.0 |
| 3     | 208,239,862     | 208,240,003 | 462      | 453.4 | 40.5  | 1.0                       | 1.0 | 1.0 |
| 4     | 208,241,993     | 208,242,145 | 362      | 354.1 | 28.2  | 1.0                       | 1.0 | 1.0 |
| 5     | 208,243,426     | 208,243,604 | 367      | 364.4 | 37.2  | 1.0                       | 1.0 | 1.0 |
| 6     | 208,245,318     | 208,245,424 | 330      | 328.7 | 16.5  | 1.0                       | 1.0 | 1.0 |
| 7     | 208,248,368     | 208,248,660 | 319      | 323.6 | 29.4  | 1.0                       | 1.0 | 1.0 |
| 8     | 208,251,429     | 208,251,567 | 279      | 285.8 | 27.4  | 1.0                       | 1.0 | 1.0 |
| 9     | 208,253,885     | 208,253,959 | 331      | 328.3 | 19.9  | 1.0                       | 1.0 | 1.0 |
| 10    | 208,254,938     | 208,255,133 | 149      | 145.0 | 99.0  | 0.8                       | 0.8 | 0.8 |

# TET2 variants

## Variant Calls - Sample '102581-03' TET2 (ENSG00000168769)

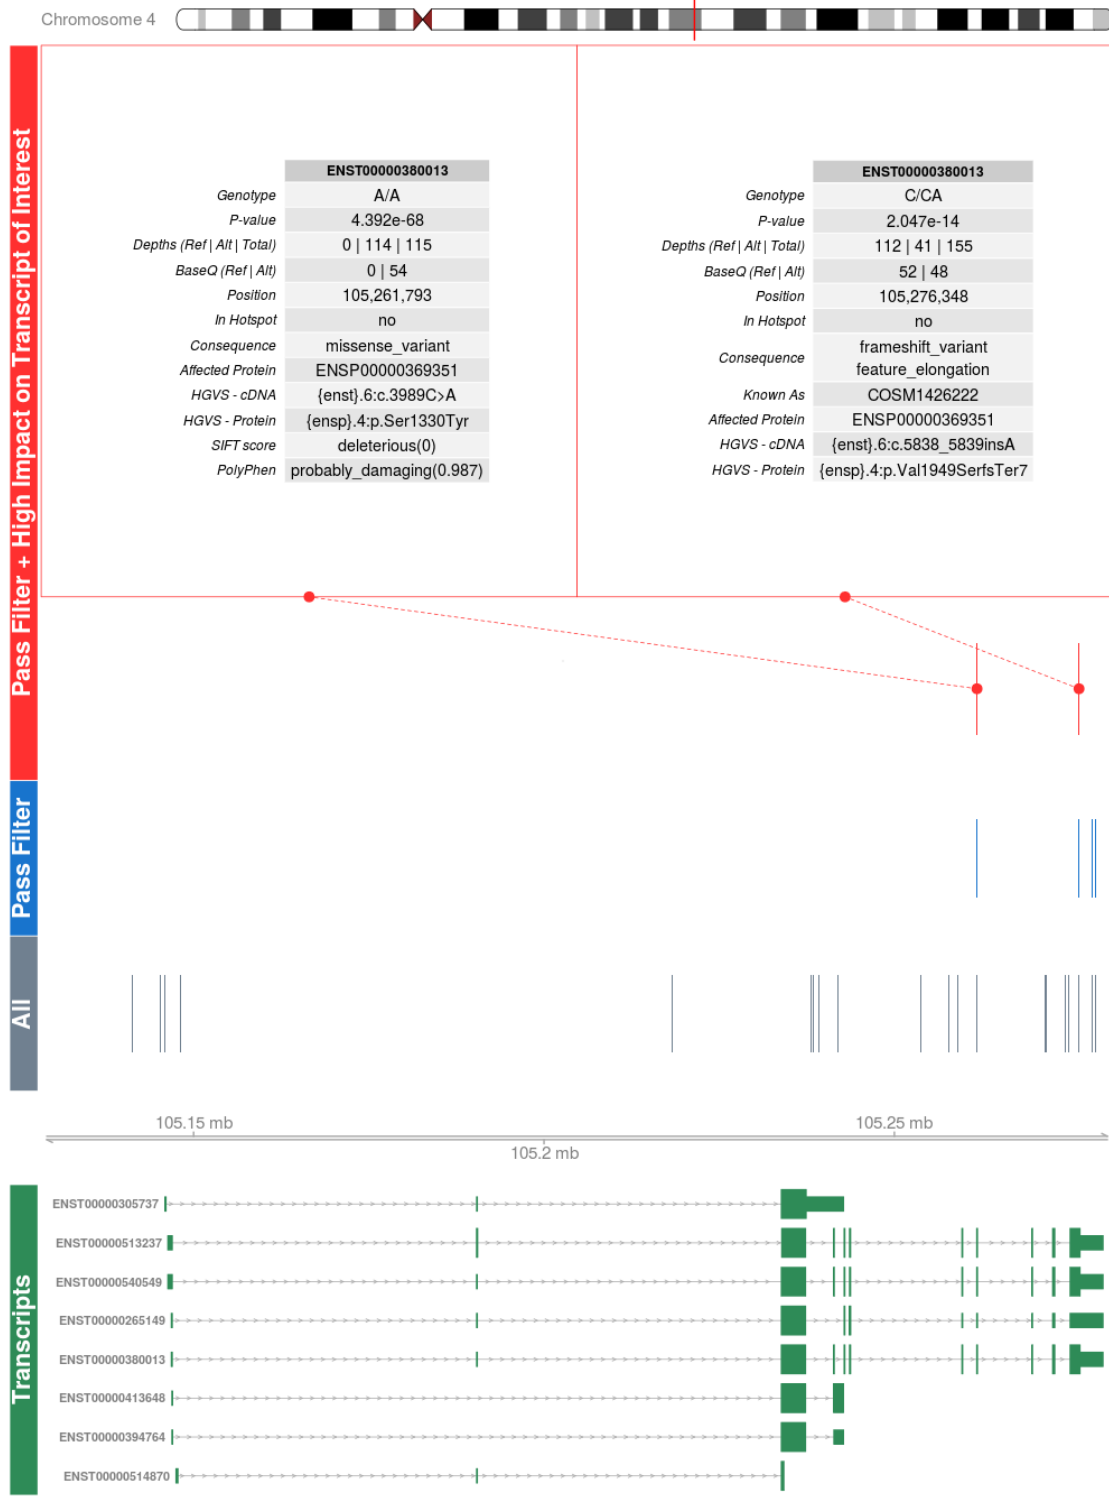

Figure 11 | TET2 variant calling results

Table 24 | Exon statistics of transcript ENST00000380013 (TET2)

| Index | Location (chr4) |             | Coverage |       |       | Fraction covered at least |     |     |
|-------|-----------------|-------------|----------|-------|-------|---------------------------|-----|-----|
|       | Start           | End         | Median   | Avg   | Stdev | 10x                       | 20x | 30x |
| 1     | 105,146,785     | 105,146,979 | 14       | 32.7  | 28.3  | 1.0                       | 0.4 | 0.4 |
| 2     | 105,190,359     | 105,190,505 | 106      | 105.1 | 4.5   | 1.0                       | 1.0 | 1.0 |
| 3     | 105,233,896     | 105,237,351 | 114      | 115.1 | 23.3  | 1.0                       | 1.0 | 1.0 |
| 4     | 105,241,338     | 105,241,429 | 107      | 108.5 | 8.1   | 1.0                       | 1.0 | 1.0 |
| 5     | 105,242,833     | 105,242,927 | 89       | 88.5  | 5.1   | 1.0                       | 1.0 | 1.0 |
| 6     | 105,243,569     | 105,243,778 | 113      | 110.4 | 11.3  | 1.0                       | 1.0 | 1.0 |
| 7     | 105,259,618     | 105,259,769 | 149      | 142.7 | 20.3  | 1.0                       | 1.0 | 1.0 |
| 8     | 105,261,758     | 105,261,848 | 165      | 160.7 | 14.6  | 1.0                       | 1.0 | 1.0 |
| 9     | 105,269,609     | 105,269,747 | 139      | 143.0 | 11.6  | 1.0                       | 1.0 | 1.0 |
| 10    | 105,272,563     | 105,272,918 | 176      | 180.6 | 21.9  | 1.0                       | 1.0 | 1.0 |
| 11    | 105,275,047     | 105,279,803 | 199      | 203.1 | 75.3  | 1.0                       | 1.0 | 1.0 |

## FLT3 variants

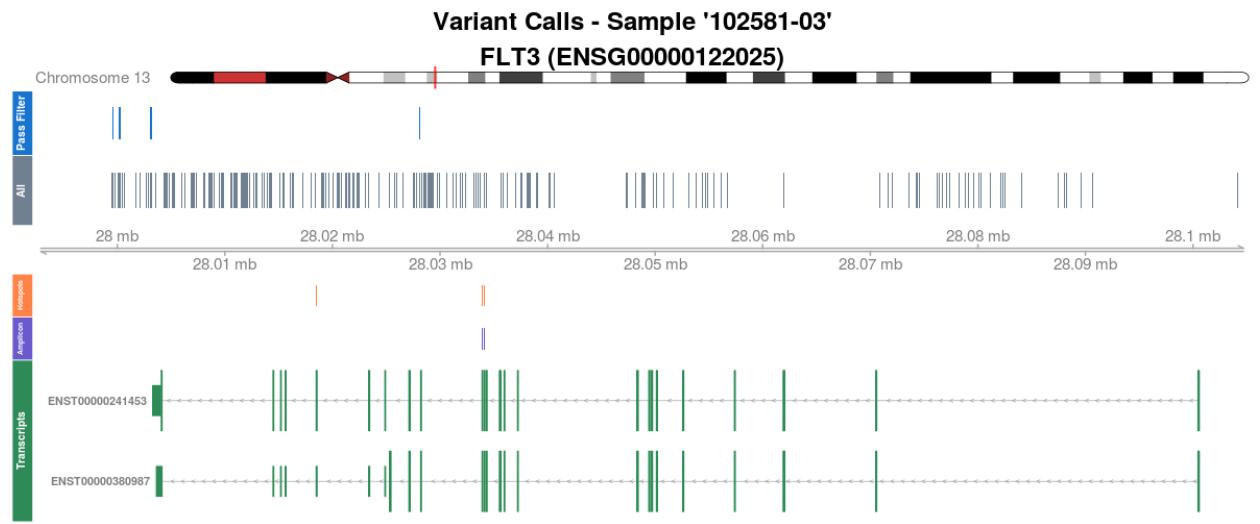

Figure 12 | FLT3 variant calling results

Table 25 | Exon statistics of transcript ENST00000241453 (FLT3)

| Index | Location (chr13) |            | Coverage |         |         | Fraction covered at least |     |     |
|-------|------------------|------------|----------|---------|---------|---------------------------|-----|-----|
|       | Start            | End        | Median   | Avg     | Stdev   | 10x                       | 20x | 30x |
| 1     | 28,003,273       | 28,004,174 | 1,346    | 1,321.6 | 1,017.3 | 1.0                       | 1.0 | 1.0 |
| 2     | 28,014,451       | 28,014,557 | 2,336    | 2,376.8 | 143.1   | 1.0                       | 1.0 | 1.0 |
| 3     | 28,015,156       | 28,015,256 | 2,270    | 2,290.5 | 116.8   | 1.0                       | 1.0 | 1.0 |
| 4     | 28,015,589       | 28,015,701 | 2,122    | 2,095.0 | 90.4    | 1.0                       | 1.0 | 1.0 |
| 5     | 28,018,466       | 28,018,589 | 2,160    | 2,165.2 | 81.0    | 1.0                       | 1.0 | 1.0 |
| 6     | 28,023,349       | 28,023,477 | 2,250    | 2,244.5 | 114.7   | 1.0                       | 1.0 | 1.0 |
| 7     | 28,024,860       | 28,024,943 | 2,386    | 2,326.8 | 219.1   | 1.0                       | 1.0 | 1.0 |
| 8     | 28,027,087       | 28,027,241 | 2,095    | 2,156.9 | 237.5   | 1.0                       | 1.0 | 1.0 |
| 9     | 28,028,177       | 28,028,288 | 1,818    | 1,847.8 | 93.3    | 1.0                       | 1.0 | 1.0 |
| 10    | 28,033,886       | 28,033,991 | 1,977    | 1,954.4 | 90.6    | 1.0                       | 1.0 | 1.0 |
| 11    | 28,034,081       | 28,034,214 | 1,993    | 1,968.4 | 77.1    | 1.0                       | 1.0 | 1.0 |
| 12    | 28,034,300       | 28,034,407 | 2,120    | 2,049.3 | 159.9   | 1.0                       | 1.0 | 1.0 |
| 13    | 28,035,494       | 28,035,673 | 2,173    | 2,162.1 | 104.6   | 1.0                       | 1.0 | 1.0 |
| 14    | 28,035,934       | 28,036,043 | 2,115    | 2,088.4 | 159.2   | 1.0                       | 1.0 | 1.0 |
| 15    | 28,037,184       | 28,037,288 | 1,907    | 1,898.8 | 102.0   | 1.0                       | 1.0 | 1.0 |
| 16    | 28,048,274       | 28,048,443 | 1,706    | 1,697.2 | 77.5    | 1.0                       | 1.0 | 1.0 |
| 17    | 28,049,383       | 28,049,537 | 1,788    | 1,765.3 | 160.4   | 1.0                       | 1.0 | 1.0 |
| 18    | 28,049,634       | 28,049,774 | 1,537    | 1,544.6 | 87.6    | 1.0                       | 1.0 | 1.0 |
| 19    | 28,050,094       | 28,050,222 | 1,252    | 1,301.4 | 113.5   | 1.0                       | 1.0 | 1.0 |
| 20    | 28,052,544       | 28,052,674 | 1,150    | 1,133.0 | 53.8    | 1.0                       | 1.0 | 1.0 |
| 21    | 28,057,346       | 28,057,462 | 1,153    | 1,148.0 | 74.2    | 1.0                       | 1.0 | 1.0 |
| 22    | 28,061,866       | 28,062,069 | 1,113    | 1,081.5 | 104.1   | 1.0                       | 1.0 | 1.0 |
| 23    | 28,070,490       | 28,070,612 | 804      | 800.4   | 36.5    | 1.0                       | 1.0 | 1.0 |
| 24    | 28,100,467       | 28,100,592 | 507      | 437.4   | 258.1   | 1.0                       | 1.0 | 1.0 |

## MECOM variants

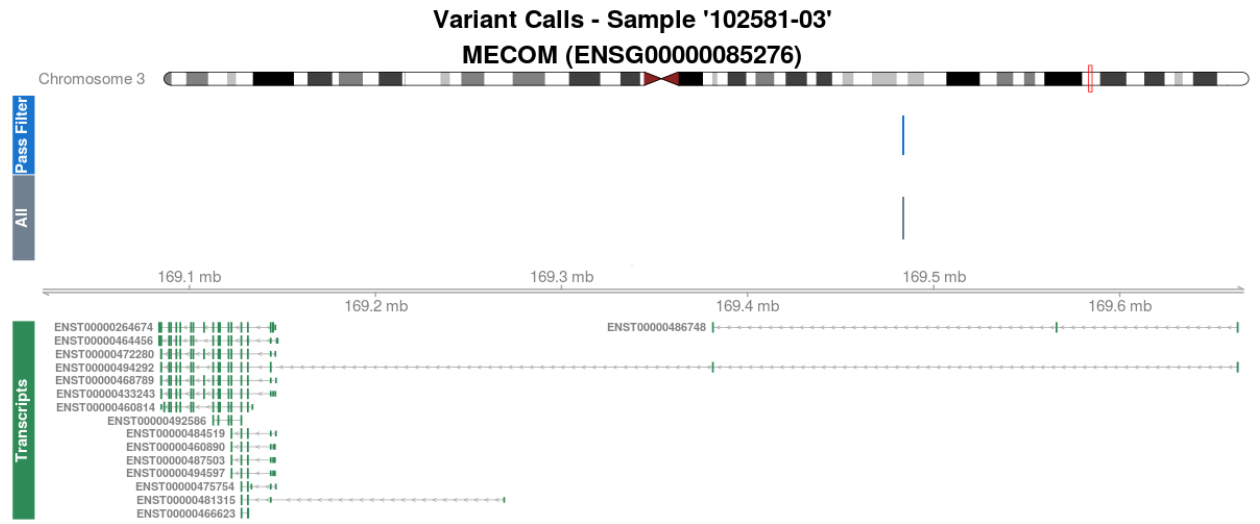

Figure 13 | MECOM variant calling results

Table 26 | Exon statistics of transcript ENST00000464456 (MECOM)

| Index | Location (chr3) |             | Coverage |     |       | Fraction covered at least |     |     |
|-------|-----------------|-------------|----------|-----|-------|---------------------------|-----|-----|
|       | Start           | End         | Median   | Avg | Stdev | 10x                       | 20x | 30x |
| 1     | 169,083,506     | 169,085,043 | 0        | 0.0 | 0.0   | 0.0                       | 0.0 | 0.0 |
| 2     | 169,088,999     | 169,089,183 | 0        | 0.0 | 0.0   | 0.0                       | 0.0 | 0.0 |
| 3     | 169,089,999     | 169,090,236 | 0        | 0.0 | 0.0   | 0.0                       | 0.0 | 0.0 |
| 4     | 169,092,957     | 169,093,102 | 0        | 0.0 | 0.0   | 0.0                       | 0.0 | 0.0 |
| 5     | 169,095,075     | 169,095,245 | 0        | 0.0 | 0.0   | 0.0                       | 0.0 | 0.0 |
| 6     | 169,100,884     | 169,100,962 | 0        | 0.0 | 0.0   | 0.0                       | 0.0 | 0.0 |
| 7     | 169,102,059     | 169,102,226 | 0        | 0.0 | 0.0   | 0.0                       | 0.0 | 0.0 |
| 8     | 169,112,786     | 169,112,874 | 0        | 0.0 | 0.0   | 0.0                       | 0.0 | 0.0 |
| 9     | 169,115,382     | 169,116,739 | 0        | 0.0 | 0.0   | 0.0                       | 0.0 | 0.0 |
| 10    | 169,121,055     | 169,121,209 | 0        | 0.0 | 0.0   | 0.0                       | 0.0 | 0.0 |
| 11    | 169,122,579     | 169,122,727 | 0        | 0.0 | 0.0   | 0.0                       | 0.0 | 0.0 |
| 12    | 169,127,843     | 169,128,060 | 0        | 0.0 | 0.0   | 0.0                       | 0.0 | 0.0 |
| 13    | 169,131,428     | 169,131,531 | 0        | 0.0 | 0.0   | 0.0                       | 0.0 | 0.0 |
| 14    | 169,143,697     | 169,143,832 | 0        | 0.0 | 0.0   | 0.0                       | 0.0 | 0.0 |
| 15    | 169,146,722     | 169,147,734 | 0        | 0.0 | 0.0   | 0.0                       | 0.0 | 0.0 |

Table 27 | Exon statistics of transcript ENST00000494292 (MECOM)

| Index | Location (chr3) |             | Coverage |     |       | Fraction covered at least |     |     |
|-------|-----------------|-------------|----------|-----|-------|---------------------------|-----|-----|
|       | Start           | End         | Median   | Avg | Stdev | 10x                       | 20x | 30x |
| 1     | 169,084,760     | 169,085,043 | 0        | 0.0 | 0.0   | 0.0                       | 0.0 | 0.0 |
| 2     | 169,088,999     | 169,089,183 | 0        | 0.0 | 0.0   | 0.0                       | 0.0 | 0.0 |
| 3     | 169,089,999     | 169,090,236 | 0        | 0.0 | 0.0   | 0.0                       | 0.0 | 0.0 |
| 4     | 169,092,957     | 169,093,102 | 0        | 0.0 | 0.0   | 0.0                       | 0.0 | 0.0 |
| 5     | 169,095,075     | 169,095,245 | 0        | 0.0 | 0.0   | 0.0                       | 0.0 | 0.0 |
| 6     | 169,100,884     | 169,100,962 | 0        | 0.0 | 0.0   | 0.0                       | 0.0 | 0.0 |
| 7     | 169,102,059     | 169,102,226 | 0        | 0.0 | 0.0   | 0.0                       | 0.0 | 0.0 |
| 8     | 169,112,786     | 169,112,874 | 0        | 0.0 | 0.0   | 0.0                       | 0.0 | 0.0 |
| 9     | 169,115,382     | 169,116,739 | 0        | 0.0 | 0.0   | 0.0                       | 0.0 | 0.0 |
| 10    | 169,121,055     | 169,121,209 | 0        | 0.0 | 0.0   | 0.0                       | 0.0 | 0.0 |
| 11    | 169,122,579     | 169,122,727 | 0        | 0.0 | 0.0   | 0.0                       | 0.0 | 0.0 |
| 12    | 169,127,843     | 169,128,060 | 0        | 0.0 | 0.0   | 0.0                       | 0.0 | 0.0 |
| 13    | 169,131,428     | 169,131,531 | 0        | 0.0 | 0.0   | 0.0                       | 0.0 | 0.0 |
| 14    | 169,143,697     | 169,143,832 | 0        | 0.0 | 0.0   | 0.0                       | 0.0 | 0.0 |
| 15    | 169,381,186     | 169,381,524 | 0        | 0.0 | 0.0   | 0.0                       | 0.0 | 0.0 |
| 16    | 169,663,335     | 169,663,470 | 2        | 1.8 | 0.5   | 0.0                       | 0.0 | 0.0 |

## CEBPA variants

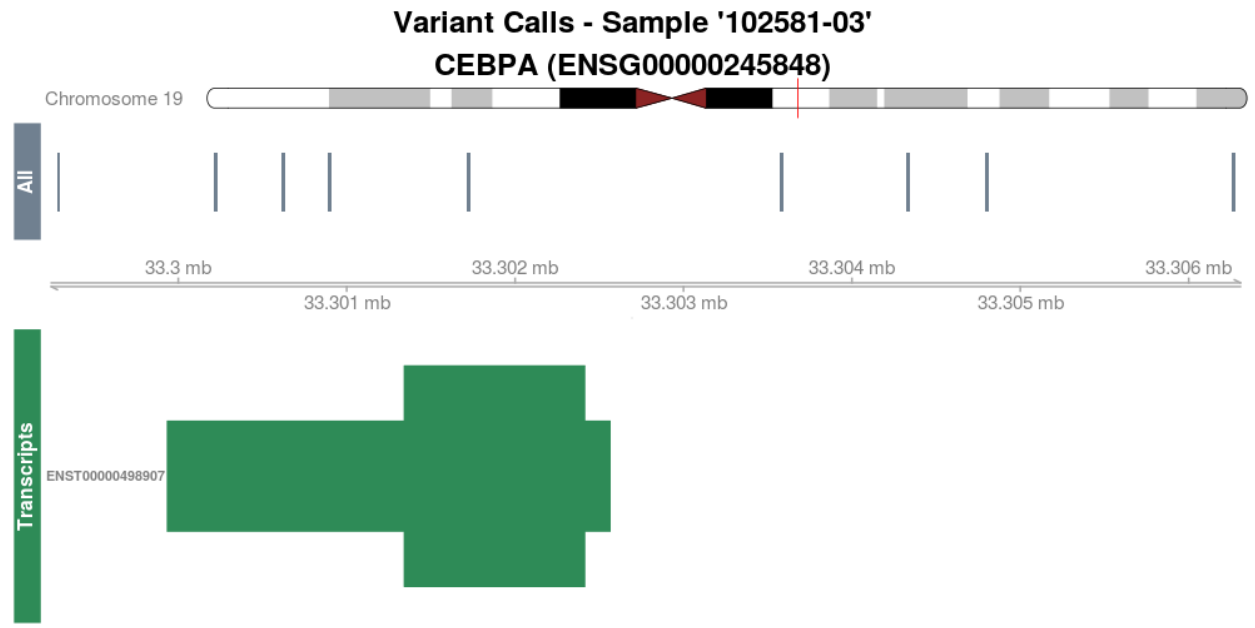

Figure 14 | CEBPA variant calling results

Table 28 | Exon statistics of transcript ENST00000498907 (CEBPA)

| Index | Location (chr19) |            | Coverage |         |       | Fraction covered at least |     |     |
|-------|------------------|------------|----------|---------|-------|---------------------------|-----|-----|
|       | Start            | End        | Median   | Avg     | Stdev | 10x                       | 20x | 30x |
| 1     | 33,299,933       | 33,302,564 | 1,464    | 1,559.4 | 882.0 | 1.0                       | 1.0 | 1.0 |

# Fusion Detection Results

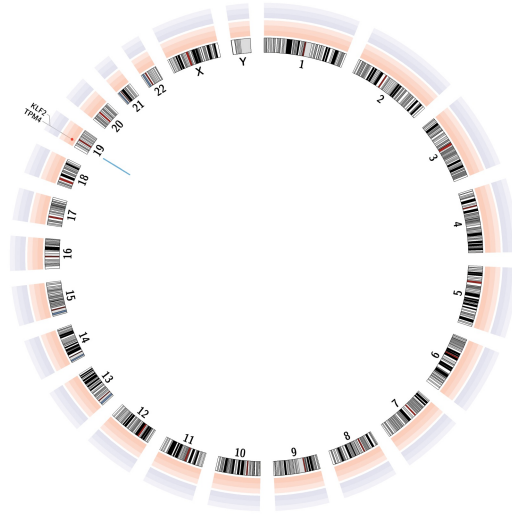

Figure 15 | Intersected fusion candidates

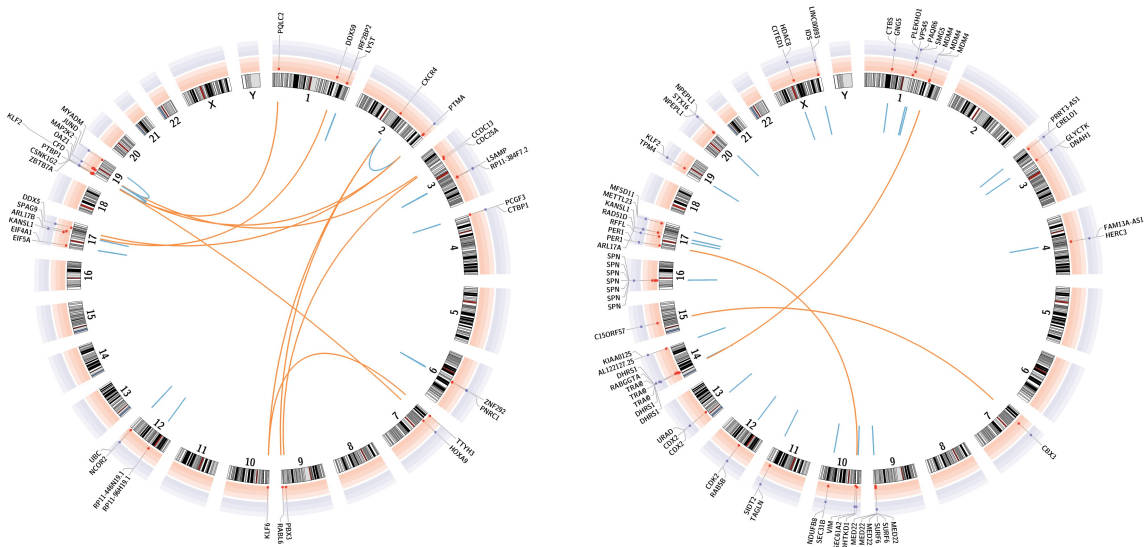

Figure 16 | STAR-Fusion (left) and FusionCatcher (right) fusion candidates

Table 29 | Top 20 intersected fusion candidates

| Fusion name | Fusion type     | Junction reads count | Spanning fragments count |
|-------------|-----------------|----------------------|--------------------------|
| TPM4--KLF2  | ONLY_REF_SPLICE | 6                    | 0                        |



# ITD/PTD Detection Results

## FLT3 ITD

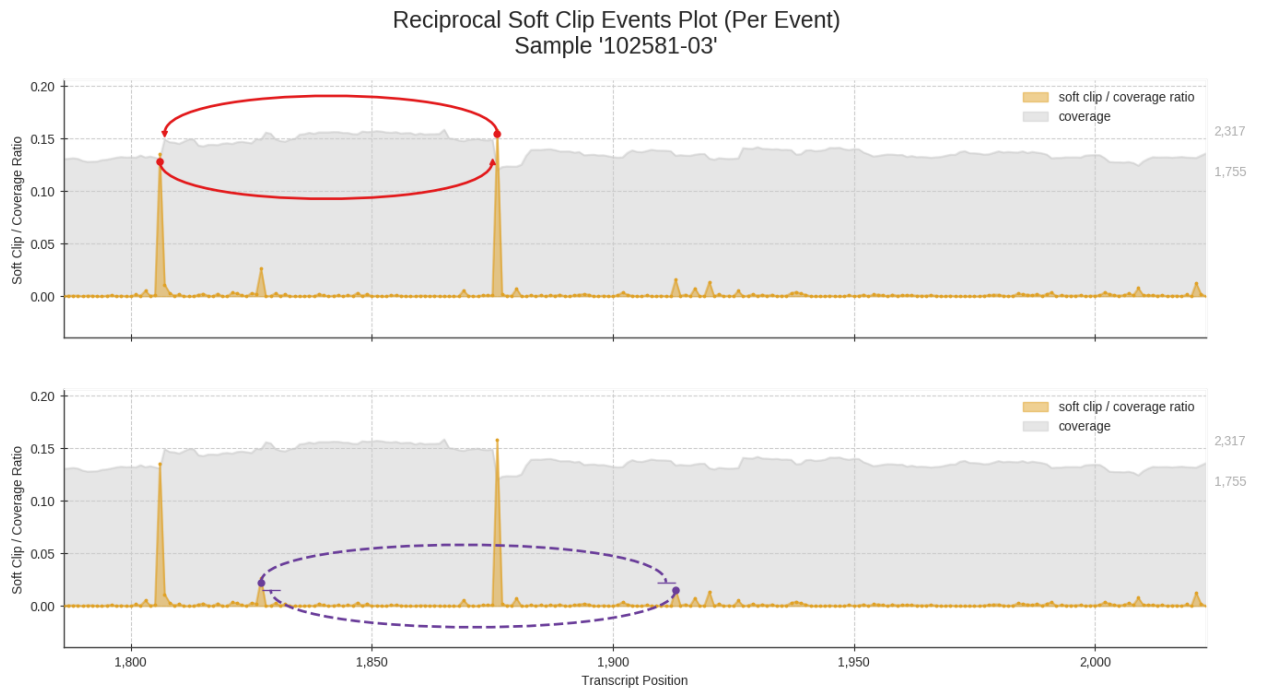

Figure 17 | FLT3 ITD detection results

## KMT2A PTD

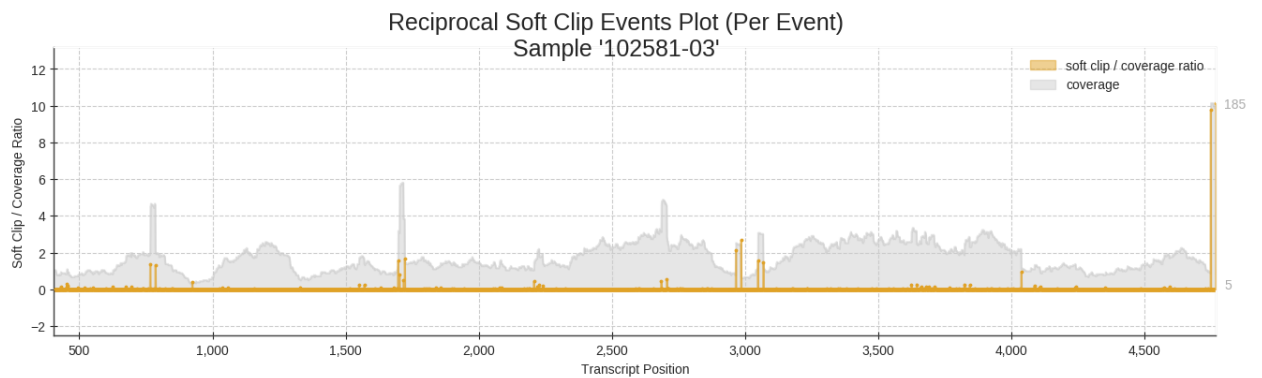

Figure 18 | KMT2A PTD detection results

# Overexpression Analysis Results

Table 30 | Selected exon ratio values

| Exon                      | Base count | Divisor gene | Divisor base count | Ratio | Above threshold |
|---------------------------|------------|--------------|--------------------|-------|-----------------|
| MECOM:169146722-169147734 | 0          | HMBS         | 217,863            | 0     | no              |

## About

Hamlet is developed jointly by the Hematology Department and Human Genetics Department of [Leiden University Medical Center](#). It is written using the [Snakemake workflow system \(v4.0\)](#). The source code can be accessed [here](#).

Front [cover image](#) taken and modified from [The Anatomy & Physiology Book](#) published on [OpenStax](#).
